# Supplementary material for: Scalable electrochemical reduction of sulfoxides to sulfides
Source: Royal Society of Chemistry journal article supplement (doi:10.1039/d1gc00591j), 2021-01-01

## Table of Contents

|                                            |            |
|--------------------------------------------|------------|
| <b>1. General information</b>              | <b>S2</b>  |
| <b>2. Synthesis of sulfoxides</b>          | <b>S3</b>  |
| <b>3. General procedure</b>                | <b>S4</b>  |
| <b>4. Gram-scale reaction</b>              | <b>S5</b>  |
| <b>5. Decagram-scale reaction</b>          | <b>S7</b>  |
| <b>6. Control experiments</b>              | <b>S8</b>  |
| <b>7. Characterization data of sulfide</b> | <b>S10</b> |
| <b>8. References</b>                       | <b>S20</b> |
| <b>9. NMR Spectra</b>                      | <b>S21</b> |

## 1. General information

All the reactions were carried out under N<sub>2</sub> atmosphere using glassware without being predried. Dichloroethane (DCE), aluminum trichloride (AlCl<sub>3</sub>), tetrabutylammonium chloride (<sup>n</sup>Bu<sub>4</sub>NCl), aluminum sheet, graphite felt are all obtained from commercial sources. The electrochemical instrument is HONGSHENGFENG DPS-305BM. Column chromatography was performed on silica gel (200-300 mesh). NMR spectra were recorded in CDCl<sub>3</sub> on 500 MHz spectrometers. <sup>1</sup>H NMR chemical shifts (δ) are reported in parts per million relative to tetramethylsilane (0 ppm). The following abbreviations are used for multiplicities: s = singlet, d = doublet, t = triplet, q = quartet, dd = doublet of doublets, and dt = doublet of triplets, m = multiplet. HRMS were obtained on an Ultima Global spectrometer with an ESI source. Melting points are uncorrected.

## 2. Synthesis of sulfoxides

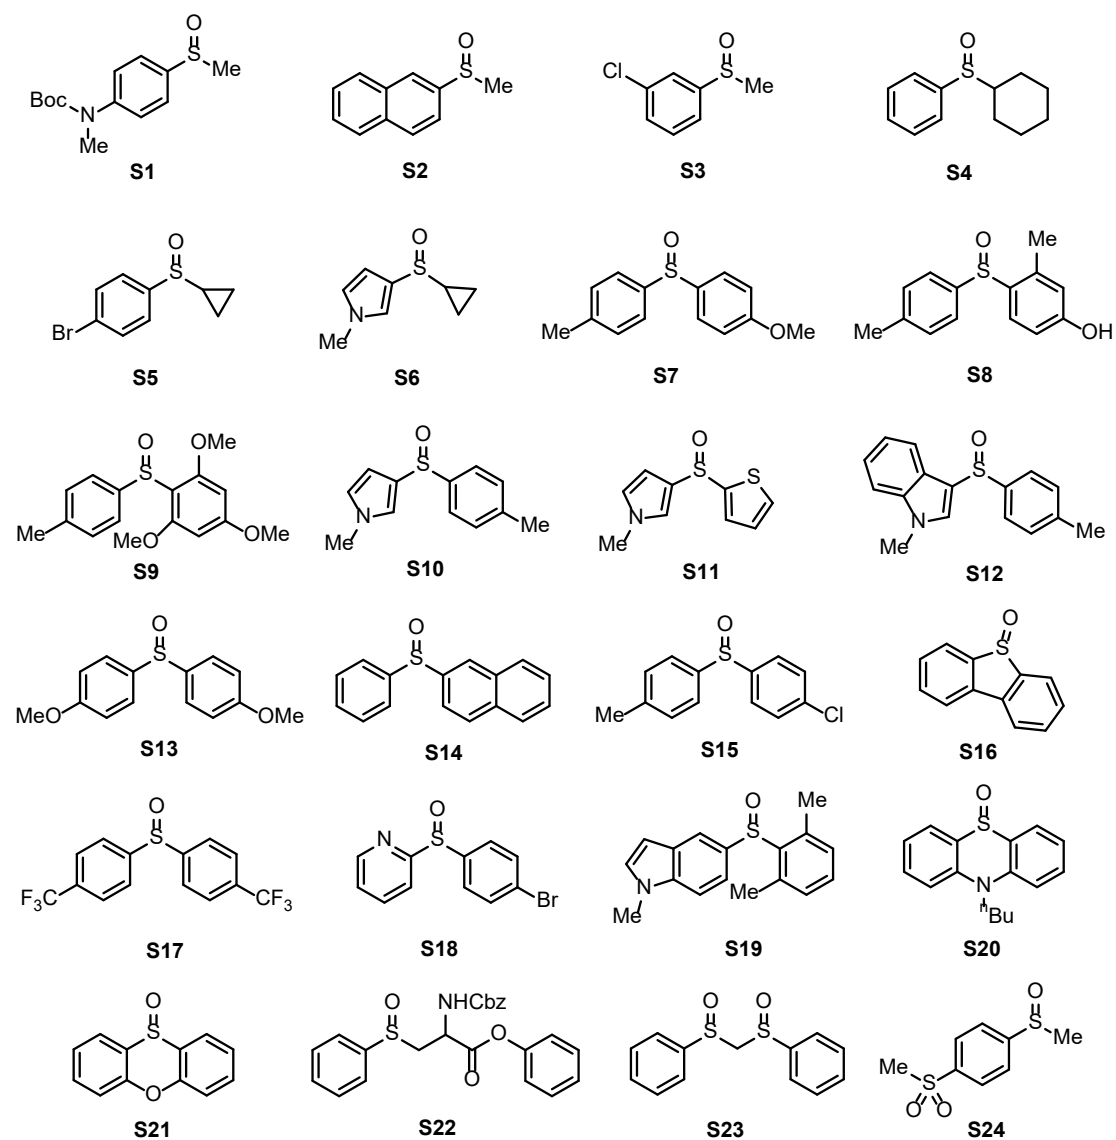

The starting materials sulfoxides **S1-S2**<sup>1</sup>, **S3**<sup>2</sup>, **S4-S5**<sup>3</sup>, **S6-S12**<sup>4</sup>, **S13-S16**<sup>5</sup>, **S17**<sup>6</sup>, **S18**<sup>7</sup>, **S19**<sup>8</sup>, **S20**<sup>9</sup>, **S21**<sup>10</sup>, **S22-S23**<sup>11</sup>, **S24**<sup>12</sup> were prepared according to literature procedure.

### 3. General procedure

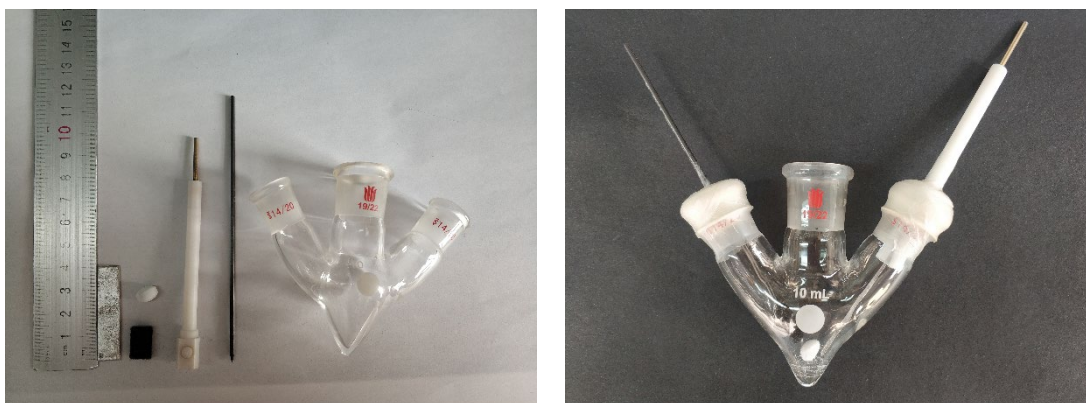

Figure S1. Components required for the reaction

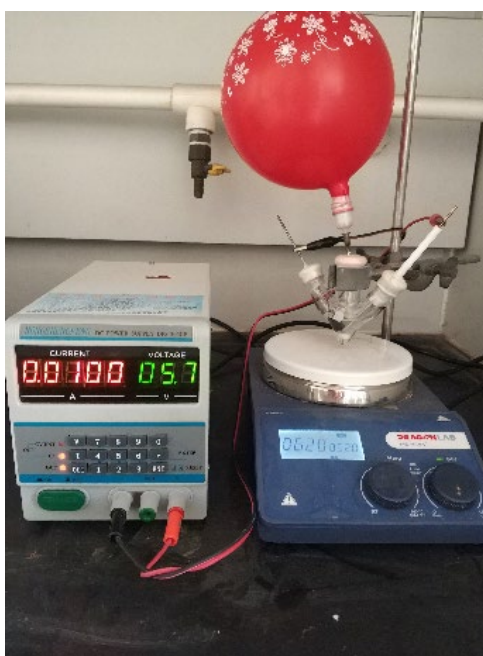

Figure S2. Typical reaction set up

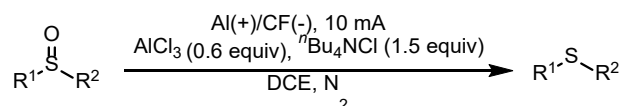

To a solution of sulfoxide (0.4 mmol), AlCl<sub>3</sub> (0.24 mmol, 0.6 equiv), <sup>n</sup>Bu<sub>4</sub>NCl (0.6 mmol, 1.5 equiv), and DCE (5 mL) was equipped with an aluminum sheet (20 × 8 × 2 mm) as the anode and a graphite felt (12 × 8 × 2 mm) as the cathode. The whole cell was undivided cell. The reaction mixture was stirred at a constant current of 10 mA under N<sub>2</sub> at room temperature for 2-6 h. After completion of the reaction (monitored by TLC), 0.5 M HCl (10 mL) was added to quench the reaction and the mixture was

extracted with DCM ( $3 \times 10$  mL). The combined organic layer was dried over anhydrous  $\text{MgSO}_4$ , filtered and concentrated under reduced pressure. The residue was purified by column chromatography on silica gel eluting with petroleum ether to give the corresponding product.

#### 4. Gram-scale reaction

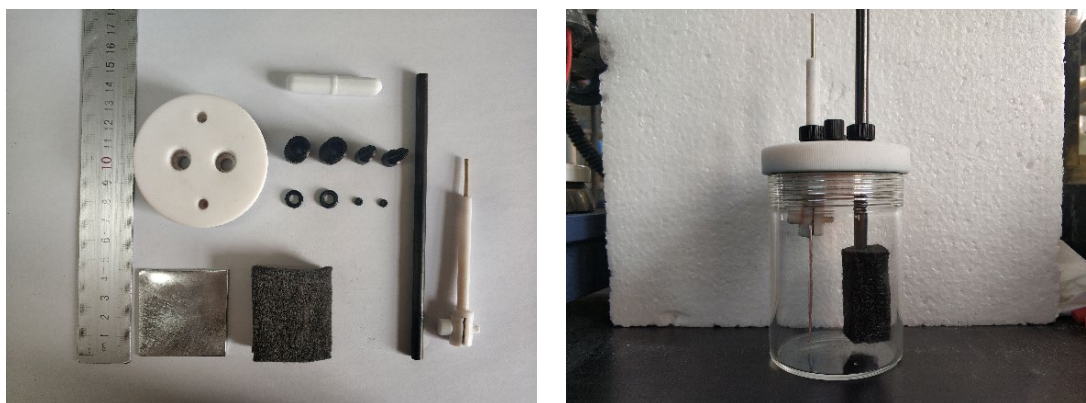

Figure S3. Components required for gram-scale reaction

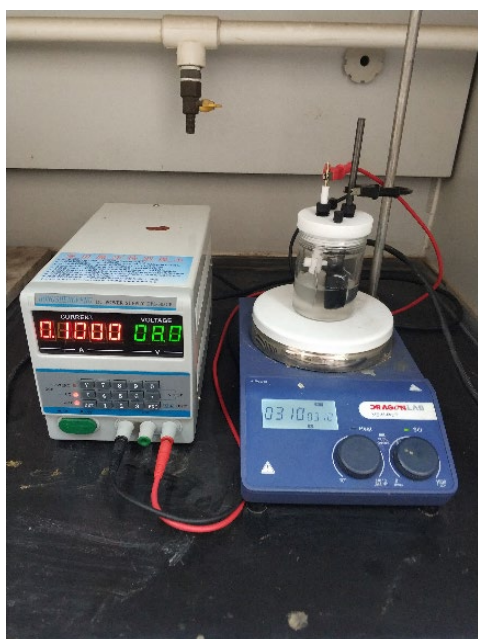

At the beginning of the reaction

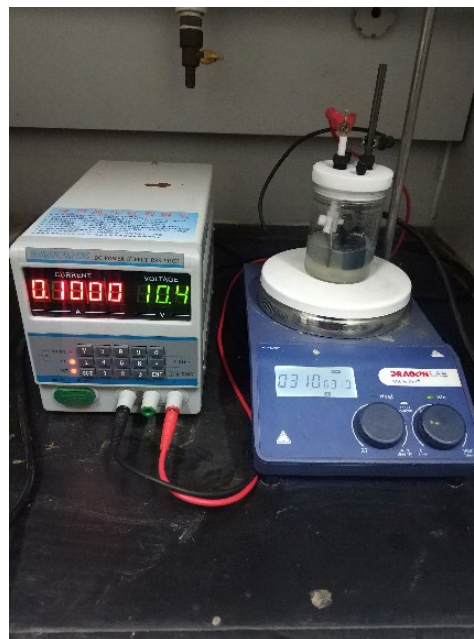

At the end of the reaction

Figure S4. Typical reaction set up for gram-scale reaction

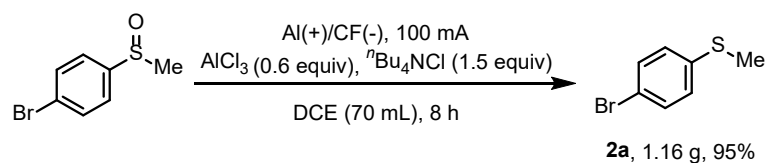

To a solution of 1-bromo-4-(methylsulfinyl)benzene (1.31 g, 6 mmol),  $\text{AlCl}_3$  (0.48 g, 3.6 mmol),  $n\text{Bu}_4\text{NCl}$  (2.5 g, 9 mmol), and DCE (70 mL) was equipped with an aluminum sheet ( $45 \times 30 \times 1$  mm) as the anode and a graphite felt ( $45 \times 30 \times 10$  mm) as the cathode. The reaction was conducted in a 150 mL beaker-type cell (Figures S3 and S4). The reaction mixture was stirred at a constant current of 100 mA under  $\text{N}_2$  at room temperature for 8 h. After completion of the reaction (monitored by TLC), 0.5 M HCl (20 mL) was added to quench the reaction and the mixture was extracted with DCM ( $3 \times 20$  mL). The combined organic layer was dried over anhydrous  $\text{MgSO}_4$ , filtered and concentrated under reduced pressure. The residue was purified by column chromatography on silica gel eluting with petroleum ether to give product **2a** in 95% yield (1.15 g) as a light yellow oil.

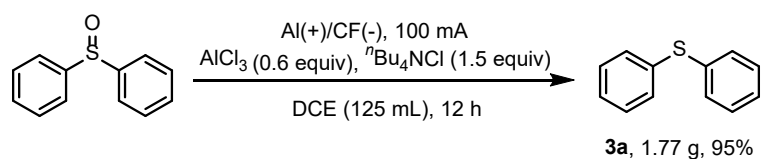

To a solution of diphenyl sulfoxide (2.02 g, 10 mmol),  $\text{AlCl}_3$  (0.8 g, 6 mmol),  $n\text{Bu}_4\text{NCl}$  (4.17 g, 15 mmol), and DCE (125 mL) was equipped with an aluminum sheet ( $45 \times 30 \times 1$  mm) as the anode and a graphite felt ( $45 \times 30 \times 10$  mm) as the cathode. The reaction was conducted in a 150 mL beaker-type cell. The reaction mixture was stirred at a constant current of 100 mA under  $\text{N}_2$  at room temperature for 12 h. After completion of the reaction (monitored by TLC), 0.5 M HCl (20 mL) was added to quench the reaction and the mixture was extracted with DCM ( $3 \times 20$  mL). The combined organic layer was dried over anhydrous  $\text{MgSO}_4$ , filtered and concentrated under reduced pressure. The residue was purified by column chromatography on silica gel eluting with petroleum ether to give product **2a** in 95% yield (1.77 g) as a light yellow oil.

## 5. Decagram-scale reaction

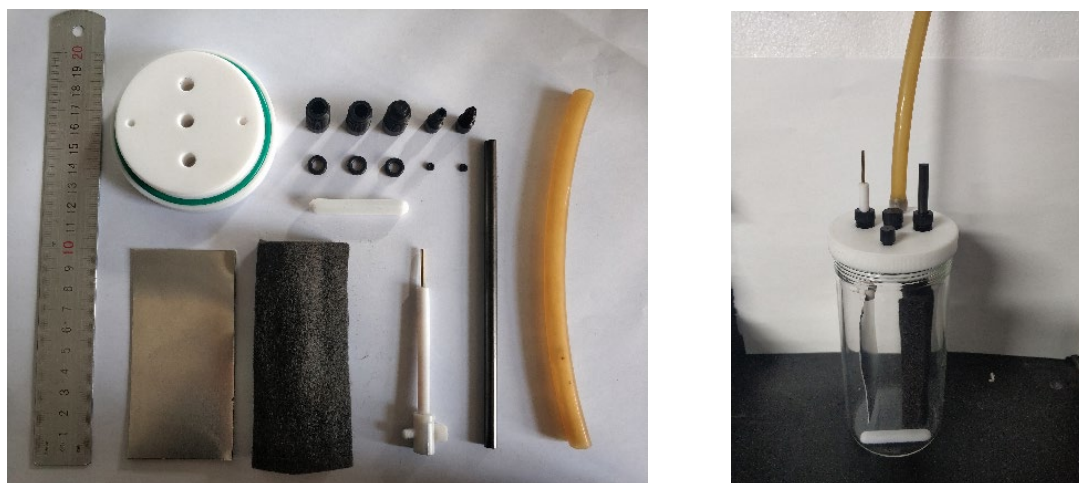

Figure S5. Components required for the decagram-scale reaction

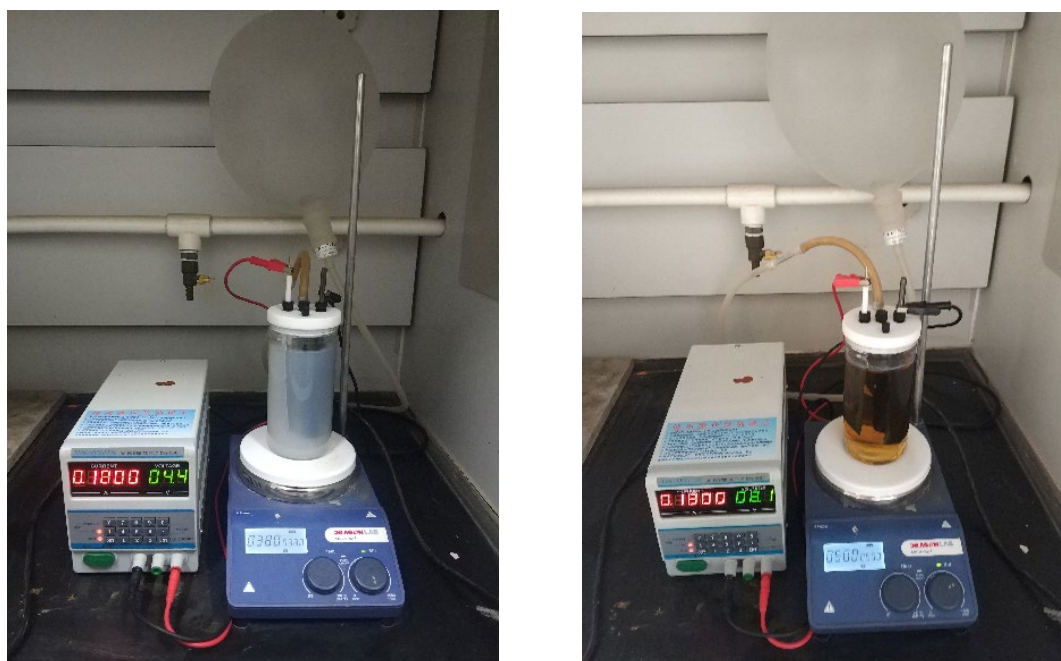

At the beginning of the reaction

At the end of the reaction

Figure S6. Typical reaction set up for the decagram-scale reaction

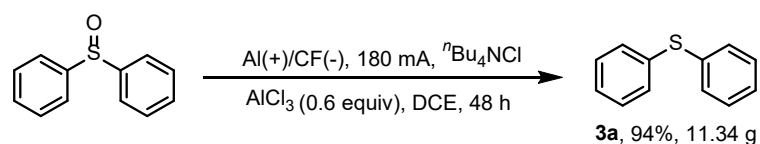

To a solution of diphenyl sulfoxide (13.15 g, 65 mmol),  $\text{AlCl}_3$  (5.2 g, 39 mmol),  ${}^n\text{Bu}_4\text{NCl}$  (27.1 g, 97.5 mmol), and DCE (400 mL) was equipped with an aluminum sheet (50 × 100 × 1 mm) as the anode and a graphite felt (50 × 100 × 10 mm)

as the cathode. The reaction was conducted in a 500 mL beaker-type cell (Figures S5 and S6). The reaction mixture was stirred at a constant current of 180 mA under N<sub>2</sub> at room temperature for 48 h. After completion of the reaction (monitored by TLC), 0.5 M HCl (50 mL) was added to quench the reaction and the mixture was extracted with DCM (3 × 50 mL). The combined organic layer was dried over anhydrous MgSO<sub>4</sub>, filtered and concentrated under reduced pressure. The residue was purified by column chromatography on silica gel eluting with petroleum ether to give product **2a** in 94% yield (11.34 g, Figure S7) as a light yellow oil.

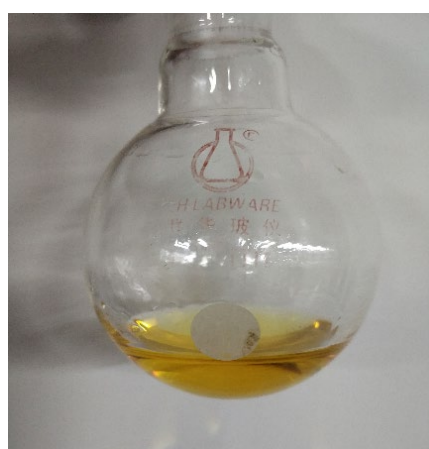

Figure S7. Pure product of **2a**

## 6. Control experiments

### Constant potential electrolysis

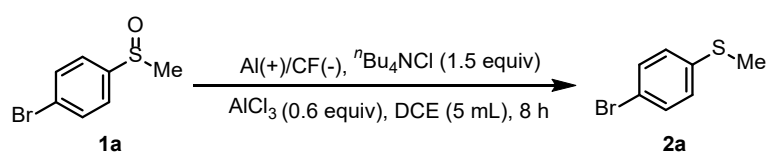

| entry | constant potential                               | yield (%) |
|-------|--------------------------------------------------|-----------|
| 1     | $E_{\text{cathode}} = -2.0 \text{ V vs Ag/AgCl}$ | trace     |
| 2     | $E_{\text{cathode}} = -2.8 \text{ V vs Ag/AgCl}$ | 76        |

The reaction was proceeded under standard conditions with Ag/AgCl as a reference electrode. Cathodic potential was controlled by the electrochemical workstation (Corrtest CS300H). Compound **2a** was obtained by flash column chromatography.



## Divided cell electrolysis

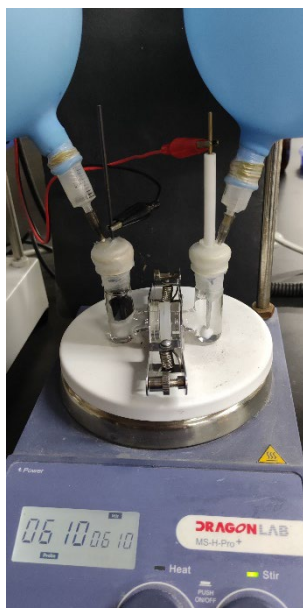

At the beginning of the reaction

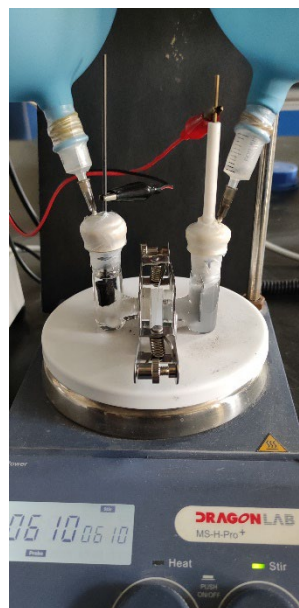

At the end of the reaction

Figure S8. Typical reaction set up of divided cell electrolysis

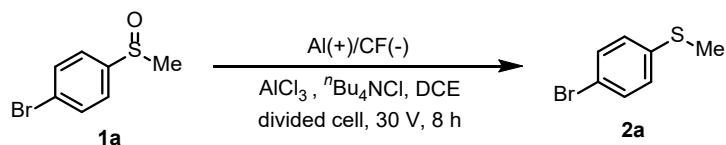

| entry | AlCl <sub>3</sub> in the cathode chamber | yield (%) |
|-------|------------------------------------------|-----------|
| 1     | -                                        | 0         |
| 2     | 0.6 equiv                                | 38        |

The model reaction was carried out in a divided cell equipped with a proton exchange membrane (DuPont). Substrate **1a** (0.4 mmol), AlCl<sub>3</sub> (0.24 mmol, 0.6 equiv), <sup>t</sup>Bu<sub>4</sub>NCl (5 mmol) and DCE (5 mL) were added to the cathode chamber while the anode chamber was added <sup>t</sup>Bu<sub>4</sub>NCl (5 mmol) and DCE (5 mL). The reaction mixture was stirred at a constant cell potential of 30 V at room temperature until the current dropped to 1 mA (8 h). Compound **2a** was obtained by flash column chromatography.

## 7. Characterization data of sulfide

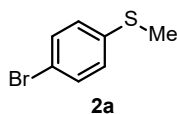

76 mg, 94% yield. Yellow oil. The spectra matched with the previous report.<sup>13</sup>

<sup>1</sup>H NMR (500 MHz, CDCl<sub>3</sub>) δ 7.39 (d, *J* = 8.6 Hz, 2H), 7.11 (d, *J* = 8.6 Hz, 2H), 2.46 (s, 3H).

<sup>13</sup>C NMR (125 MHz, CDCl<sub>3</sub>) δ 137.8, 131.9, 128.2, 118.7, 16.0.

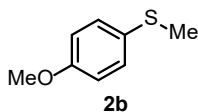

57 mg, 92% yield. Light yellow oil. The spectra matched with the previous report.<sup>14</sup>

<sup>1</sup>H NMR (500 MHz, CDCl<sub>3</sub>) δ 7.29 – 7.25 (m, 2H), 6.90 – 6.82 (m, 2H), 3.79 (s, 3H), 2.45 (s, 3H).

<sup>13</sup>C NMR (125 MHz, CDCl<sub>3</sub>) δ 158.3, 130.3, 128.9, 114.7, 55.5, 18.2.

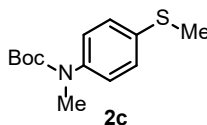

52 mg, 51% yield. Yellow oil. The spectra matched with the previous report.<sup>15</sup>

<sup>1</sup>H NMR (500 MHz, CDCl<sub>3</sub>) δ 7.21 (d, *J* = 8.6 Hz, 2H), 7.15 (d, *J* = 8.3 Hz, 2H), 3.22 (s, 3H), 2.46 (s, 3H), 1.44 (s, 9H).

<sup>13</sup>C NMR (125 MHz, CDCl<sub>3</sub>) δ 154.8, 141.3, 135.1, 127.2, 126.0, 80.4, 37.4, 28.4, 16.4.

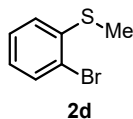

65 mg, 80% yield. Colorless oil. The spectra matched with the previous report.<sup>16</sup>

<sup>1</sup>H NMR (500 MHz, CDCl<sub>3</sub>) δ 7.52 (dd, *J* = 7.9, 1.4 Hz, 1H), 7.32 – 7.26 (m, 1H), 7.13 (dd, *J* = 7.9, 1.5 Hz, 1H), 7.03 – 6.97 (m, 1H), 2.47 (s, 3H).

<sup>13</sup>C NMR (125 MHz, CDCl<sub>3</sub>) δ 139.8, 132.8, 127.9, 125.8, 125.5, 121.9, 15.8.

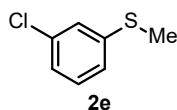

54 mg, 85% yield. Colorless oil. The spectra matched with the previous report.<sup>17</sup>

<sup>1</sup>H NMR (500 MHz, CDCl<sub>3</sub>) δ 7.22 – 7.17 (m, 2H), 7.14 – 7.08 (m, 2H), 2.48 (s, 3H).

<sup>13</sup>C NMR (125 MHz, CDCl<sub>3</sub>) δ 140.8, 134.9, 129.9, 126.0, 125.1, 124.6, 15.7.

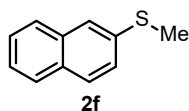

67 mg, 96% yield. White solid. M.p = 124 – 126 °C. The spectra matched with the previous report.<sup>18</sup>

<sup>1</sup>H NMR (500 MHz, CDCl<sub>3</sub>) δ 7.80 (d, *J* = 8.1 Hz, 1H), 7.78 – 7.72 (m, 2H), 7.63 (d, *J* = 1.9 Hz, 1H), 7.53 – 7.46 (m, 1H), 7.46 – 7.38 (m, 2H), 2.61 (s, 3H).

<sup>13</sup>C NMR (125 MHz, CDCl<sub>3</sub>) δ 136.2, 134.0, 131.4, 128.3, 127.8, 126.9, 126.7, 125.8, 125.3, 123.5, 15.9.

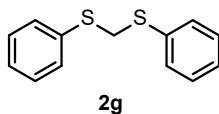

68 mg, 73% yield. White solid. M.p = 39 – 41 °C. The spectra matched with the previous report.<sup>19</sup>

<sup>1</sup>H NMR (500 MHz, CDCl<sub>3</sub>) δ 7.45 – 7.39 (m, 4H), 7.31 (t, *J* = 7.5 Hz, 4H), 7.26 – 7.23 (m, 2H), 4.34 (s, 2H).

<sup>13</sup>C NMR (125 MHz, CDCl<sub>3</sub>) δ 135.1, 130.8, 129.1, 127.3, 40.7.

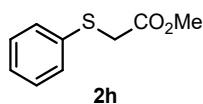

39 mg, 54% yield. Colorless oil. The spectra matched with the previous report.<sup>13</sup>

<sup>1</sup>H NMR (500 MHz, CDCl<sub>3</sub>) δ 7.40 (d, *J* = 7.6 Hz, 2H), 7.30 (dd, *J* = 8.5, 6.8 Hz, 2H), 7.25 – 7.20 (m, 1H), 3.71 (s, 3H), 3.65 (s, 2H).

<sup>13</sup>C NMR (125 MHz, CDCl<sub>3</sub>) δ 170.3, 135.0, 130.0, 129.2, 127.1, 52.6, 36.6.

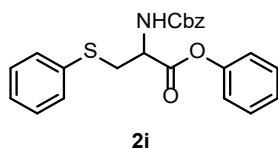

110 mg, 67% yield. White solid. M.p = 71 – 73 °C. The spectra matched with the previous report.<sup>11</sup>

**<sup>1</sup>H NMR** (500 MHz, CDCl<sub>3</sub>) δ 7.45 (d, *J* = 7.5 Hz, 2H), 7.36 – 7.31 (m, 7H), 7.27 (dd, *J* = 8.3, 6.4 Hz, 2H), 7.24 – 7.20 (m, 2H), 6.94 (d, *J* = 7.9 Hz, 2H), 5.64 (d, *J* = 7.9 Hz, 1H), 5.13 – 5.05 (m, 2H), 4.90 – 4.84 (m, 1H), 3.62 – 3.50 (m, 2H).

**<sup>13</sup>C NMR** (125 MHz, CDCl<sub>3</sub>) δ 169.2, 155.6, 150.3, 136.1, 134.6, 131.2, 129.6, 129.4, 128.7, 128.4, 128.2, 127.4, 126.4, 121.4, 67.3, 54.3, 37.2.

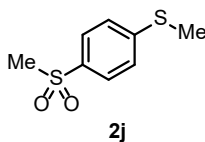

70 mg, 86% yield. White solid. M.p = 97 – 99 °C. The spectra matched with the previous report.<sup>20</sup>

**<sup>1</sup>H NMR** (500 MHz, CDCl<sub>3</sub>) δ 7.80 (d, *J* = 8.6 Hz, 2H), 7.33 (d, *J* = 8.6 Hz, 2H), 3.02 (s, 3H), 2.51 (s, 3H).

**<sup>13</sup>C NMR** (125 MHz, CDCl<sub>3</sub>) δ 147.3, 136.3, 127.7, 125.5, 44.8, 14.8.

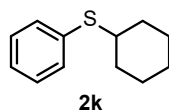

74 mg, 94% yield. Colorless oil. The spectra matched with the previous report.<sup>21</sup>

**<sup>1</sup>H NMR** (500 MHz, CDCl<sub>3</sub>) δ 7.40 (d, *J* = 7.4 Hz, 2H), 7.29 (t, *J* = 7.6 Hz, 2H), 7.22 (t, *J* = 7.4 Hz, 1H), 3.16 – 3.07 (m, 1H), 1.99 (d, *J* = 12.2 Hz, 2H), 1.78 (dd, *J* = 8.7, 3.8 Hz, 2H), 1.66 – 1.57 (m, 1H), 1.41 – 1.25 (m, 5H).

**<sup>13</sup>C NMR** (125 MHz, CDCl<sub>3</sub>) δ 135.3, 132.0, 128.9, 126.7, 46.7, 33.5, 26.2, 25.9.

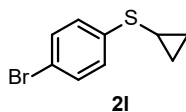

65 mg, 70% yield. Light yellow oil.

**<sup>1</sup>H NMR** (500 MHz, CDCl<sub>3</sub>) δ 7.39 (d, *J* = 8.5 Hz, 2H), 7.23 (d, *J* = 8.5 Hz, 2H), 2.20 – 2.13 (m, 1H), 1.12 – 1.03 (m, 2H), 0.72 – 0.66 (m, 2H).

**<sup>13</sup>C NMR** (125 MHz, CDCl<sub>3</sub>) δ 138.3, 131.8, 128.1, 118.6, 12.2, 8.7.

**HRMS** (ESI-TOF, [M + H<sup>+</sup>]): calcd for C<sub>9</sub>H<sub>9</sub>BrS, 228.9687, found 228.9692.

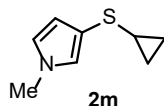

33 mg, 54% yield. Yellow oil.

**<sup>1</sup>H NMR** (500 MHz, CDCl<sub>3</sub>) δ 6.68 (t, *J* = 2.0 Hz, 1H), 6.58 (t, *J* = 2.5 Hz, 1H), 6.24 – 6.19 (m, 1H), 3.63 (s, 3H), 2.13 – 2.06 (m, 1H), 0.86 – 0.77 (m, 2H), 0.67 – 0.61 (m, 2H).

**<sup>13</sup>C NMR** (125 MHz, CDCl<sub>3</sub>) δ 124.6, 122.5, 113.3, 112.8, 36.5, 17.1, 8.4.

**HRMS** (ESI-TOF, [M + H<sup>+</sup>]): calcd for C<sub>8</sub>H<sub>11</sub>NS, 154.0690, found 154.0689.

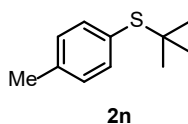

33 mg, 46% yield. Colorless oil. The spectra matched with the previous report.<sup>22</sup>

**<sup>1</sup>H NMR** (500 MHz, CDCl<sub>3</sub>) δ 7.42 (d, *J* = 8.0 Hz, 2H), 7.14 (d, *J* = 7.7 Hz, 2H), 2.36 (s, 3H), 1.27 (s, 9H).

**<sup>13</sup>C NMR** (125 MHz, CDCl<sub>3</sub>) δ 138.9, 137.5, 129.4, 129.3, 45.7, 31.0, 21.4.

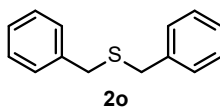

55 mg, 64% yield. Colorless oil. The spectra matched with the previous report.<sup>14</sup>

**<sup>1</sup>H NMR** (500 MHz, CDCl<sub>3</sub>) δ 7.55 – 6.65 (m, 10H), 3.62 (s, 4H).

**<sup>13</sup>C NMR** (125 MHz, CDCl<sub>3</sub>) δ 138.3, 129.1, 128.6, 127.1, 35.7.

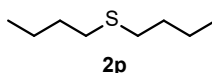

52 mg, 88% yield. Colorless oil. The spectra matched with the previous report.<sup>14</sup>

**<sup>1</sup>H NMR** (500 MHz, CDCl<sub>3</sub>) δ 2.50 (dd, *J* = 8.1, 6.8 Hz, 4H), 1.59 – 1.53 (m, 4H), 1.44 – 1.36 (m, 4H), 0.91 (t, *J* = 7.3 Hz, 6H).

$^{13}\text{C}$  NMR (125 MHz,  $\text{CDCl}_3$ )  $\delta$  32.0, 22.2, 13.9.

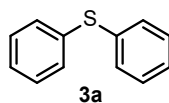

67 mg, 90% yield. Light yellow oil. The spectra matched with the previous report.<sup>13</sup>

$^1\text{H}$  NMR (500 MHz,  $\text{CDCl}_3$ )  $\delta$  7.34 (d,  $J = 7.2$  Hz, 4H), 7.29 (t,  $J = 7.5$  Hz, 4H), 7.25 – 7.22 (m, 2H).

$^{13}\text{C}$  NMR (125 MHz,  $\text{CDCl}_3$ )  $\delta$  135.9, 131.2, 129.3, 127.2.

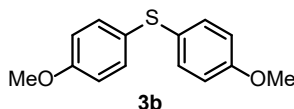

99 mg, 94% yield. Light yellow oil. The spectra matched with the previous report.<sup>21</sup>

$^1\text{H}$  NMR (500 MHz,  $\text{CDCl}_3$ )  $\delta$  7.29 (d,  $J = 8.7$  Hz, 4H), 6.84 (d,  $J = 8.7$  Hz, 4H), 3.79 (s, 6H).

$^{13}\text{C}$  NMR (125 MHz,  $\text{CDCl}_3$ )  $\delta$  159.1, 132.8, 127.6, 114.9, 55.5.

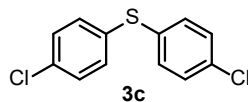

53 mg, 52% yield. White solid. M.p = 87 – 89 °C. The spectra matched with the previous report.<sup>23</sup>

$^1\text{H}$  NMR (500 MHz,  $\text{CDCl}_3$ )  $\delta$  7.30 – 7.23 (m, 8H).

$^{13}\text{C}$  NMR (125 MHz,  $\text{CDCl}_3$ )  $\delta$  134.1, 133.6, 132.4, 129.6.

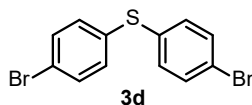

77 mg, 56% yield. White solid. M.p = 112 – 114 °C. The spectra matched with the previous report.<sup>23</sup>

$^1\text{H}$  NMR (500 MHz,  $\text{CDCl}_3$ )  $\delta$  7.46 – 7.38 (m, 4H), 7.22 – 7.15 (m, 4H).

$^{13}\text{C}$  NMR (125 MHz,  $\text{CDCl}_3$ )  $\delta$  134.6, 132.7, 132.6, 121.6.

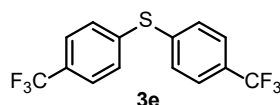

52 mg, 40% yield. Colorless oil. The spectra matched with the previous report.<sup>16</sup>

**<sup>1</sup>H NMR** (500 MHz, CDCl<sub>3</sub>) δ 7.6 (d, *J* = 8.2 Hz, 4H), 7.5 (d, *J* = 8.3 Hz, 4H).

**<sup>13</sup>C NMR** (125 MHz, CDCl<sub>3</sub>) δ 139.7, 131.2, 129.8 (q, *J* = 32.8 Hz), 126.4 (d, *J* = 3.7 Hz), 124.0 (q, *J* = 272.1 Hz).

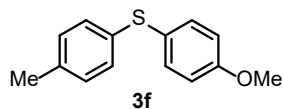

90 mg, 98% yield. Yellow oil. The spectra matched with the previous report.<sup>24</sup>

**<sup>1</sup>H NMR** (500 MHz, CDCl<sub>3</sub>) δ 7.39 (d, *J* = 8.7 Hz, 2H), 7.16 (d, *J* = 8.3 Hz, 2H), 7.09 (d, *J* = 8.2 Hz, 2H), 6.89 (d, *J* = 8.7 Hz, 2H), 3.82 (s, 3H), 2.32 (s, 3H).

**<sup>13</sup>C NMR** (125 MHz, CDCl<sub>3</sub>) δ 159.5, 136.2, 134.5, 129.9, 129.5, 125.7, 115.0, 55.4, 21.1.

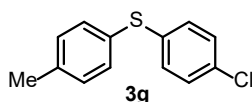

84 mg, 90% yield. White solid. M.p = 110 – 112 °C. The spectra matched with the previous report.<sup>23</sup>

**<sup>1</sup>H NMR** (500 MHz, CDCl<sub>3</sub>) δ 7.33 – 7.29 (m, 2H), 7.23 (d, *J* = 8.6 Hz, 2H), 7.17 (dd, *J* = 10.9, 8.3 Hz, 4H), 2.36 (s, 3H).

**<sup>13</sup>C NMR** (125 MHz, CDCl<sub>3</sub>) δ 138.2, 136.1, 132.6, 132.4, 130.9, 130.8, 130.3, 129.3, 21.3.

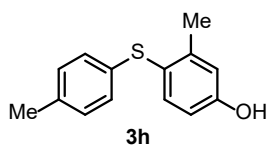

28 mg, 30% yield. Light red oil.

**<sup>1</sup>H NMR** (500 MHz, CDCl<sub>3</sub>) δ 7.34 (d, *J* = 8.3 Hz, 1H), 7.08 – 6.98 (m, 4H), 6.78 (d, *J* = 2.8 Hz, 1H), 6.70 – 6.64 (m, 1H), 5.27 – 5.10 (m, 1H), 2.33 (s, 3H), 2.30 (s, 3H).

**<sup>13</sup>C NMR** (125 MHz, CDCl<sub>3</sub>) δ 156.1, 143.6, 136.8, 135.5, 134.4, 129.9, 128.0, 124.1, 117.8, 114.0, 21.0.

**HRMS** (ESI-TOF, [M - H<sup>+</sup>]): calcd for C<sub>14</sub>H<sub>14</sub>OS, 229.0693, found 229.0702.

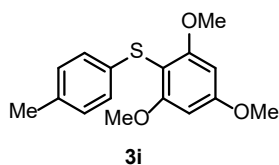

71 mg, 84% yield. Yellow solid. M.p = 90 – 92 °C

**<sup>1</sup>H NMR** (500 MHz, CDCl<sub>3</sub>) δ 7.00 – 6.90 (m, 4H), 6.21 (s, 2H), 3.86 (s, 3H), 3.81 (s, 6H), 2.25 (s, 3H).

**<sup>13</sup>C NMR** (125 MHz, CDCl<sub>3</sub>) δ 162.9, 162.6, 135.1, 134.2, 129.4, 126.1, 99.4, 91.3, 56.4, 55.5, 21.0.

**HRMS** (ESI-TOF, [M + Na<sup>+</sup>]): calcd for C<sub>16</sub>H<sub>18</sub>O<sub>3</sub>S, 313.0874, found 313.0872.

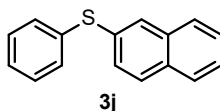

91 mg, 96% yield. Yellow oil. The spectra matched with the previous report.<sup>18</sup>

**<sup>1</sup>H NMR** (500 MHz, CDCl<sub>3</sub>) δ 7.86 (s, 1H), 7.84 – 7.80 (m, 1H), 7.77 (dd, *J* = 16.2, 8.93 Hz, 2H), 7.52 – 7.45 (m, 2H), 7.45 – 7.38 (m, 3H), 7.33 (t, *J* = 7.4 Hz, 2H), 7.28 (d, *J* = 7.2 Hz, 1H).

**<sup>13</sup>C NMR** (125 MHz, CDCl<sub>3</sub>) δ 136.0, 133.9, 133.2, 132.4, 131.1, 130.0, 129.4, 129.0, 128.9, 127.9, 127.6, 127.2, 126.7, 126.3.

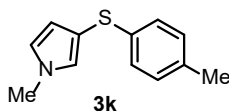

59 mg, 73% yield. Yellow oil.

**<sup>1</sup>H NMR** (500 MHz, CDCl<sub>3</sub>) δ 7.08 (d, *J* = 8.0 Hz, 2H), 7.03 (d, *J* = 8.0 Hz, 2H), 6.81 (s, 1H), 6.66 (d, *J* = 2.6 Hz, 1H), 6.25 (dd, *J* = 2.9, 1.5 Hz, 1H), 3.68 (s, 3H), 2.29 (s, 3H).

**<sup>13</sup>C NMR** (125 MHz, CDCl<sub>3</sub>) δ 137.2, 134.5, 129.5, 127.5, 126.3, 123.2, 114.8, 109.1, 36.6, 21.0.

**HRMS** (ESI-TOF, [M + H<sup>+</sup>]): calcd for C<sub>12</sub>H<sub>13</sub>NS, 204.0847, found 204.0845.

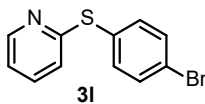



46 mg, 42% yield. Yellow oil. The spectra matched with the previous report.<sup>25</sup>

**<sup>1</sup>H NMR** (500 MHz, CDCl<sub>3</sub>) δ 8.42 (d, *J* = 7.0 Hz, 1H), 7.54 (d, *J* = 8.5 Hz, 2H), 7.50 – 7.46 (m, 1H), 7.44 (d, *J* = 8.5 Hz, 2H), 7.02 (dd, *J* = 7.5, 4.9 Hz, 1H), 6.95 (d, *J* = 8.0 Hz, 1H).

**<sup>13</sup>C NMR** (125 MHz, CDCl<sub>3</sub>) δ 160.5, 149.9, 137.0, 136.3, 132.9, 130.5, 123.6, 121.9, 120.4.

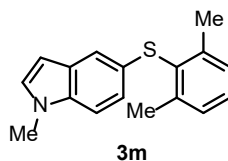

74 mg, 69% yield. Yellow solid. M.p = 82 – 84 °C.

**<sup>1</sup>H NMR** (500 MHz, CDCl<sub>3</sub>) δ 7.24 – 7.20 (m, 2H), 7.18 (d, *J* = 7.6 Hz, 3H), 7.01 – 6.94 (m, 2H), 6.33 (d, *J* = 3.1 Hz, 1H), 3.74 (s, 3H), 2.48 (s, 6H).

**<sup>13</sup>C NMR** (125 MHz, CDCl<sub>3</sub>) δ 143.7, 135.2, 132.8, 129.4, 129.4, 128.8, 128.4, 127.4, 121.5, 119.1, 109.9, 100.5, 33.0, 22.2.

**HRMS** (ESI-TOF, [M + H<sup>+</sup>]): calcd for C<sub>17</sub>H<sub>17</sub>NS, 268.1160, found 268.1157.

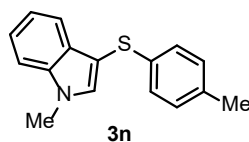

60 mg, 63% yield. White solid. M.p = 74 – 76 °C.

**<sup>1</sup>H NMR** (500 MHz, CDCl<sub>3</sub>) δ 7.59 (d, *J* = 7.4 Hz, 1H), 7.35 (d, *J* = 7.7 Hz, 1H), 7.29 – 7.21 (m, 2H), 7.13 (t, *J* = 7.2 Hz, 1H), 7.05 – 6.86 (m, 4H), 3.80 (s, 3H), 2.29 – 2.13 (m, 3H).

**<sup>13</sup>C NMR** (125 MHz, CDCl<sub>3</sub>) δ 137.6, 136.1, 135.0, 134.6, 130.0, 129.6, 126.3, 122.6, 120.5, 119.9, 109.8, 101.4, 33.2, 21.0.

**HRMS** (ESI-TOF, [M + H<sup>+</sup>]): calcd for C<sub>16</sub>H<sub>15</sub>NS, 254.1003, found 254.1007.

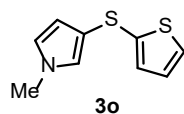

43 mg, 56% yield. Yellow oil.

**<sup>1</sup>H NMR** (500 MHz, CDCl<sub>3</sub>) δ 7.21 (dd, *J* = 5.3, 1.4 Hz, 1H), 7.05 (dd, *J* = 3.6, 1.4 Hz, 1H), 6.90 (dd, *J* = 5.3, 3.6 Hz, 1H), 6.79 (t, *J* = 2.1 Hz, 1H), 6.57 (t, *J* = 2.5 Hz, 1H), 6.25 (dd, *J* = 2.8, 1.7 Hz, 1H), 3.63 (s, 3H).

**<sup>13</sup>C NMR** (125 MHz, CDCl<sub>3</sub>) δ 139.4, 129.5, 127.4, 125.8, 122.8, 113.3, 112.9, 36.6.

**HRMS** (ESI-TOF, [M + H<sup>+</sup>]): calcd for C<sub>9</sub>H<sub>9</sub>NS<sub>2</sub>, 196.0255, found 196.0253.

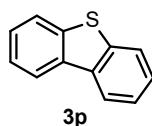

43 mg, 58% yield. White solid. M.p = 87 – 89 °C. The spectra matched with the previous report.<sup>26</sup>

**<sup>1</sup>H NMR** (500 MHz, CDCl<sub>3</sub>) δ 8.20 – 8.14 (m, 2H), 7.90 – 7.85 (m, 2H), 7.50 – 7.45 (m, 4H).

**<sup>13</sup>C NMR** (125 MHz, CDCl<sub>3</sub>) δ 139.4, 135.6, 126.7, 124.4, 122.8, 121.6.

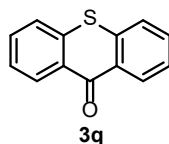

71 mg, 84% yield. Yellow solid. M.p = 207 – 209 °C. The spectra matched with the previous report.<sup>27</sup>

**<sup>1</sup>H NMR** (500 MHz, CDCl<sub>3</sub>) δ 8.64 – 8.56 (m, 2H), 7.63 – 7.58 (m, 2H), 7.58 – 7.53 (m, 2H), 7.49 – 7.44 (m, 2H).

**<sup>13</sup>C NMR** (125 MHz, CDCl<sub>3</sub>) δ 180.1, 137.4, 132.4, 130.0, 129.4, 126.4, 126.1.

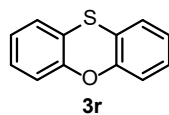

69 mg, 86% yield. White solid. M.p = 54 – 56 °C. The spectra matched with the previous report.<sup>18</sup>

**<sup>1</sup>H NMR** (500 MHz, CDCl<sub>3</sub>) δ 7.16 – 7.12 (m, 2H), 7.10 (dd, *J* = 8.0, 1.5 Hz, 2H), 7.05 – 6.98 (m, 4H).

**<sup>13</sup>C NMR** (125 MHz, CDCl<sub>3</sub>) δ 152.3, 127.8, 126.9, 124.6, 120.2, 117.9.

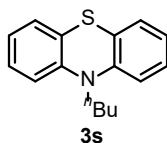

96 mg, 94% yield. Light yellow oil. The spectra matched with the previous report.<sup>28</sup>

**<sup>1</sup>H NMR** (500 MHz, CDCl<sub>3</sub>) δ 7.15 (d, *J* = 7.3 Hz, 4H), 6.89 (d, *J* = 9.2 Hz, 4H), 3.86 (s, 2H), 1.84 – 1.77 (m, 2H), 1.51 – 1.43 (m, 2H), 0.95 (t, *J* = 7.3 Hz, 3H).

**<sup>13</sup>C NMR** (125 MHz, CDCl<sub>3</sub>) δ 145.4, 127.5, 127.3, 125.1, 122.4, 115.6, 47.3, 29.2, 20.3, 14.0.

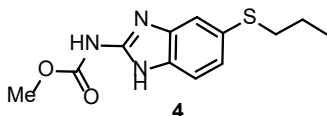

80 mg, 74% yield. Yellow solid. The spectra matched with the previous report.<sup>29</sup>

**<sup>1</sup>H NMR** (500 MHz, DMSO-*d*<sub>6</sub>) δ 11.78 (s, 2H), 7.45 (s, 1H), 7.35 (s, 1H), 7.10 (s, 1H), 3.77 (s, 3H), 2.85 (t, *J* = 7.1 Hz, 2H), 1.53 (m, 2H), 0.96 (s, 3H).

**<sup>13</sup>C NMR** (125 MHz, DMSO-*d*<sub>6</sub>) δ 154.7, 147.8, 136.7, 135.3, 126.9, 124.1, 115.9, 114.2, 52.5, 36.7, 22.1, 13.1.

**HRMS** (ESI-TOF, [M + H<sup>+</sup>]): calcd for C<sub>12</sub>H<sub>15</sub>N<sub>3</sub>O<sub>2</sub>S, 266.0963, found 266.0967.

## 8. References

1. Y. Uetake, T. Niwa and T. Hosoya, *Org. Lett.*, 2016, **18**, 2758–2761.
2. I. Bassanini, E. E. Ferrandi, M. Vanoni, G. Ottolina, S. Riva, M. Crotti, E. Brenna and D. Monti, *Eur. J. Org. Chem.*, 2017, **47**, 7186–7189.
3. W. Mao, M. Ning, Z. Liu, Q. Zhu, Y. Leng and A. Zhang, *Bioorg. Med. Chem.*, 2012, **20**, 2982–2991.
4. Y.-Z. Ji, H.-J. Li, H.-R. Yang, Z.-Y. Zhang, L.-J. Xie and Y.-C. Wu, *Synlett*, 2020, **31**, 349–354.
5. X. Li, Y. Sun, X. Huang, L. Zhang, L. Kong and B. Peng, *Org. Lett.*, 2017, **19**, 838–841.
6. M. Frings, C. Bolm, A. Blum and C. Gnamm, *Eur. J. Med. Chem.*, 2017, **126**, 225–245.
7. J. Mruk, L. Pazderski, J. Scianowski and A. Wojtczak, *Inorganica Chim. Acta.*, 2020, **500**, 119–182.
8. Y. Yoshida, S. Otsuka, K. Nogi and H. Yorimitsu, *Org. Lett.*, 2018, **20**, 1134–1137.
9. E. M. Gayakwad, V. V. Patil and G. S. Shankarling, *New J. Chem.*, 2016, **40**, 223–230.
10. A. Shokrolahi, A. Zali and M. H. Keshavarz, *Chin. J. Catal.*, 2010, **31**, 1427–1432.
11. P. Acosta-Guzman, C. Mahecha-Mahecha and D. Gamba-Sanchez, *Chem. Eur. J.*, 2020, **26**, 10348–10354.
12. P. A. Joseph, S. Priyadarshini, M. L. Kantam and B. Sreedhar, *Tetrahedron Lett.*, 2013, **69**, 8276–8283.
13. A. K. Clarke, A. Parkin, R. J. K. Taylor, W. P. Unsworth and J. A. R. Ashton, *ACS Catal.*, 2020, **10**, 5814–5820.
14. B. Basu, S. Paul and A. K. Nanda, *Green Chem.*, 2010, **12**, 767–771.
15. Y. Uetake, T. Niwa and T. Hosoya, *Org. Lett.*, 2016, **18**, 2758–2761.
16. C. O. Kinen, L. I. Rossi and R. H. Rossi, *Green Chem.*, 2009, **11**, 223–228.
17. P. Hanson, R. A. A. J. Hendrickx and J. R. L. Smith, *Org. Biomol. Chem.*, 2008, **6**, 745–761.
18. F. Ding, Y. Jiang, S. Gan, R. L. Bao, K. Lin and L. Shi, *Eur. J. Org. Chem.*, 2017, **24**, 3427–3430.
19. Q. Chen, G. Yu and Y. Huo, *Org. Biomol. Chem.*, 2018, **16**, 4086–4089.
20. S. Chen, Y. Li, M. Wang and X. Jiang, *Green Chem.*, 2020, **22**, 322–326.
21. T. Itoh and T. Mase, *Org. Lett.*, 2004, **6**, 4587–4590.
22. F. Gelat, J.-F. Lohier, A.-C. Gaumont and S. Perrio, *Adv. Synth. Catal.*, 2015, **357**, 2011–2016.
23. H. Yang, C. Xi, Z. Miao and R. Chen, *Eur. J. Org. Chem.*, 2011, **18**, 3353–3360.
24. S. Jammi, S. Sakthivel, L. Rout, T. Mukherjee, S. Mandal, R. Mitra, P. Saha and T. Punniyamurthy, *J. Org. Chem.*, 2009, **74**, 1971–1976.
25. B. Sreedhar, P. S. Reddy and M. A. Reddy, *Synthesis*, 2009, **10**, 1732–1738.
26. G. K. S. Prakash, C. Weber, S. Chacko and G. A. Olah, *Org. Lett.*, 2007, **9**, 1863–1866.
27. J. Zhao and R. C. Larock, *Org. Lett.*, 2005, **7**, 4273–4275.
28. S. H. Kim, Y. W. Kim, C. Sakong, J. Namgoong, S. W. Park, M. J. Ko, C. H. Lee, W. I. Lee and J. P. Kim, *Org. Lett.*, 2011, **13**, 5784–5787.
29. H. L. Sandoval, M. E. Londono-Lemos, R. Garza-Velasco, I. Poblano-Melendez, P. Granada-Macias, I. Gracia-Mora and N. Barba-Behrens, *J. Inorg. Biochem.*, 2008, **102**, 1267–1276.

## 9. NMR Spectra

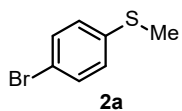

$^1\text{H}$  NMR  
500 MHz  
 $\text{CDCl}_3$

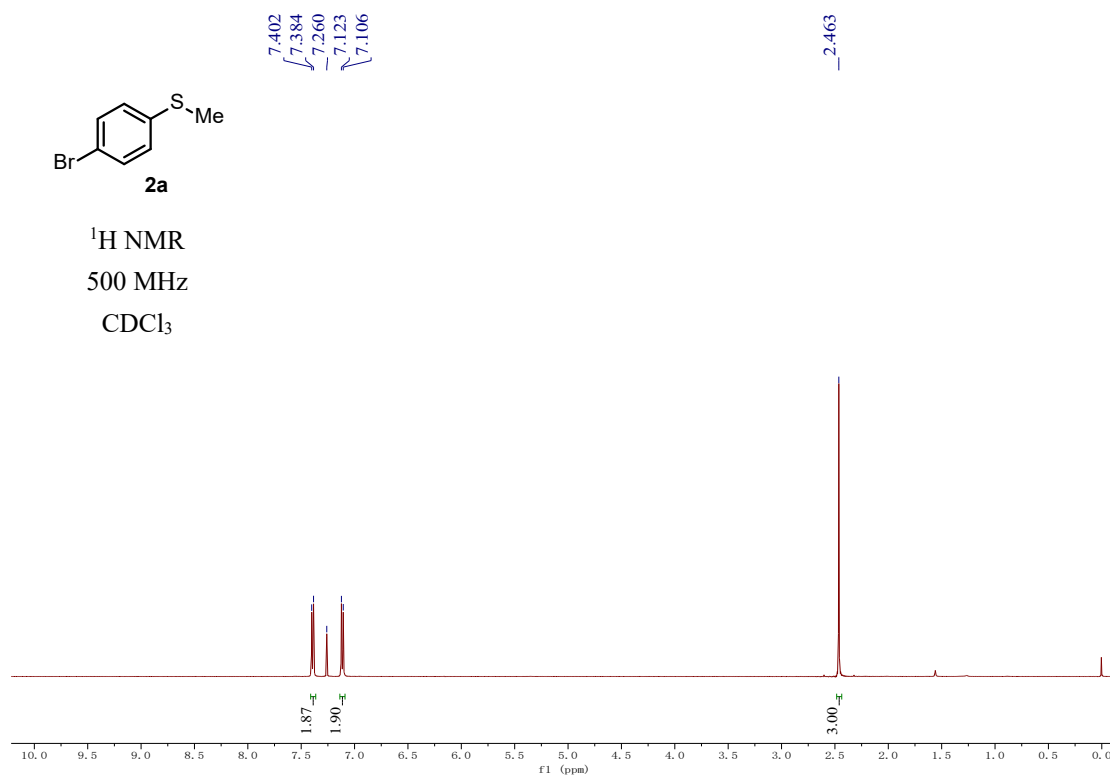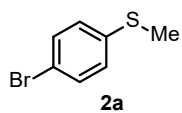

$^{13}\text{C}$  NMR  
125 MHz  
 $\text{CDCl}_3$

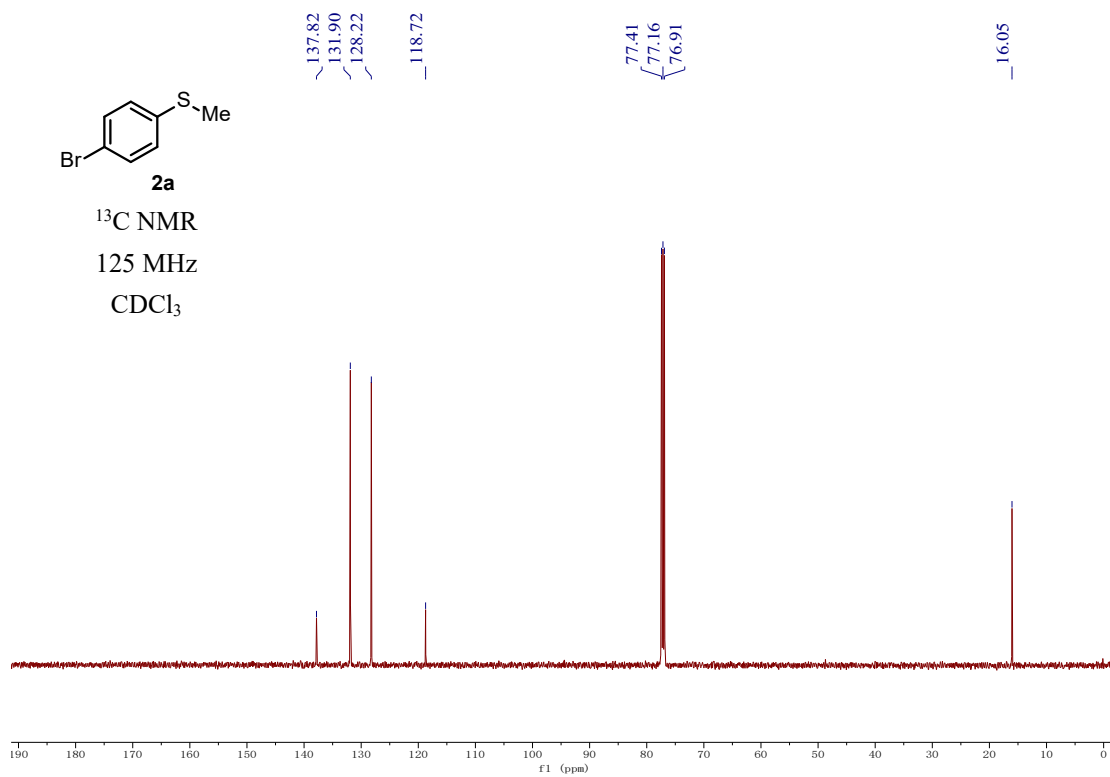

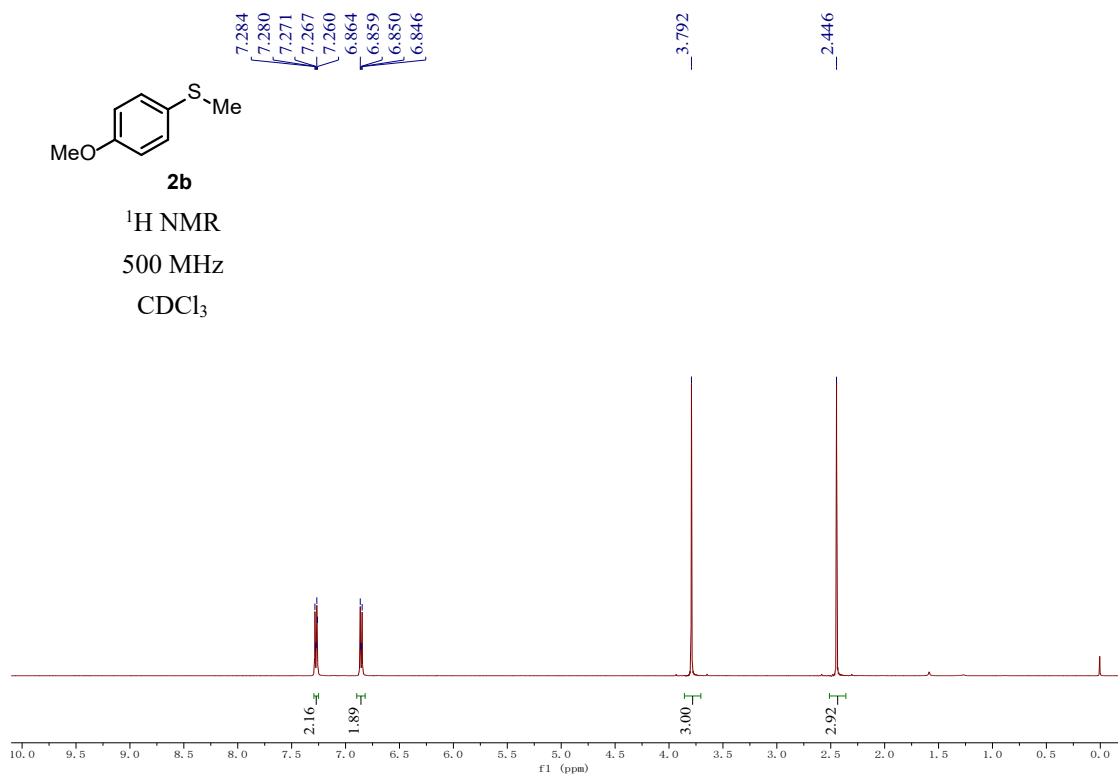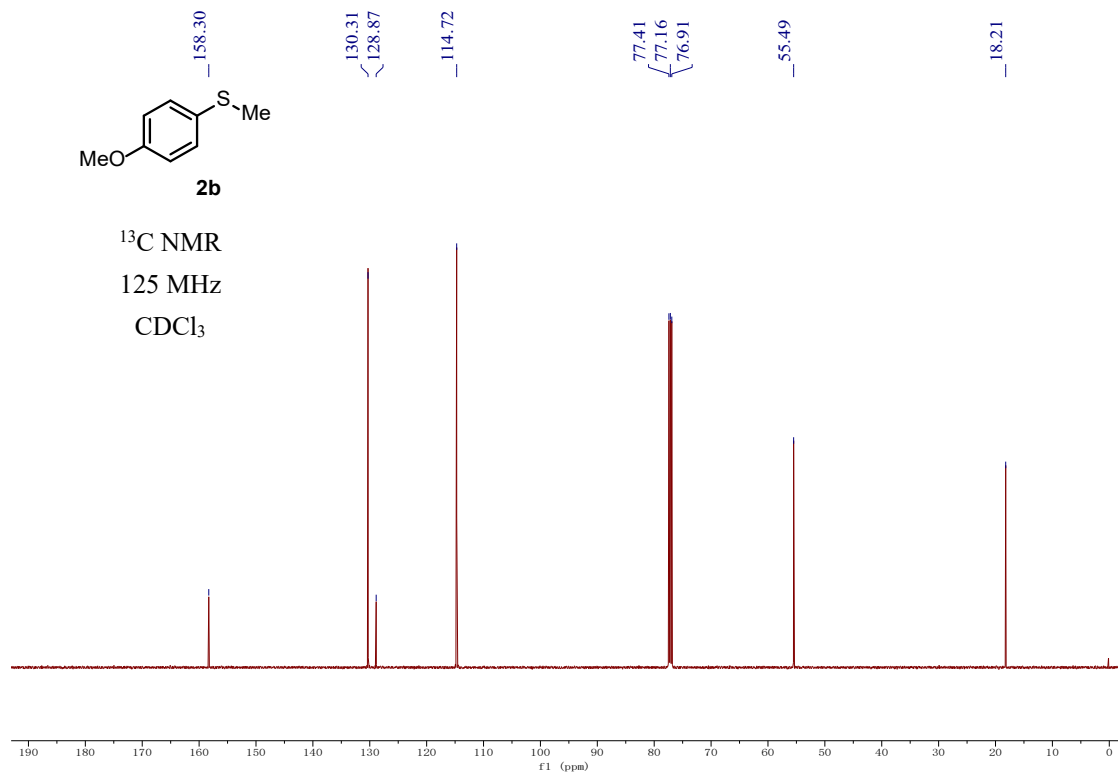

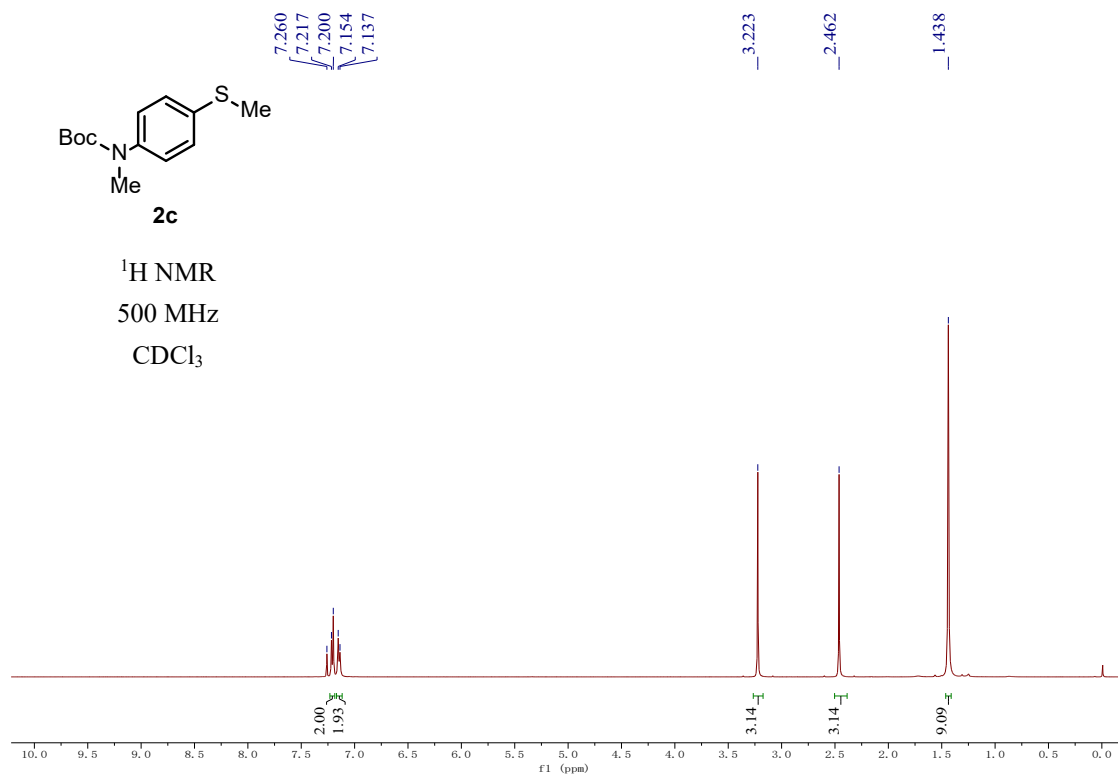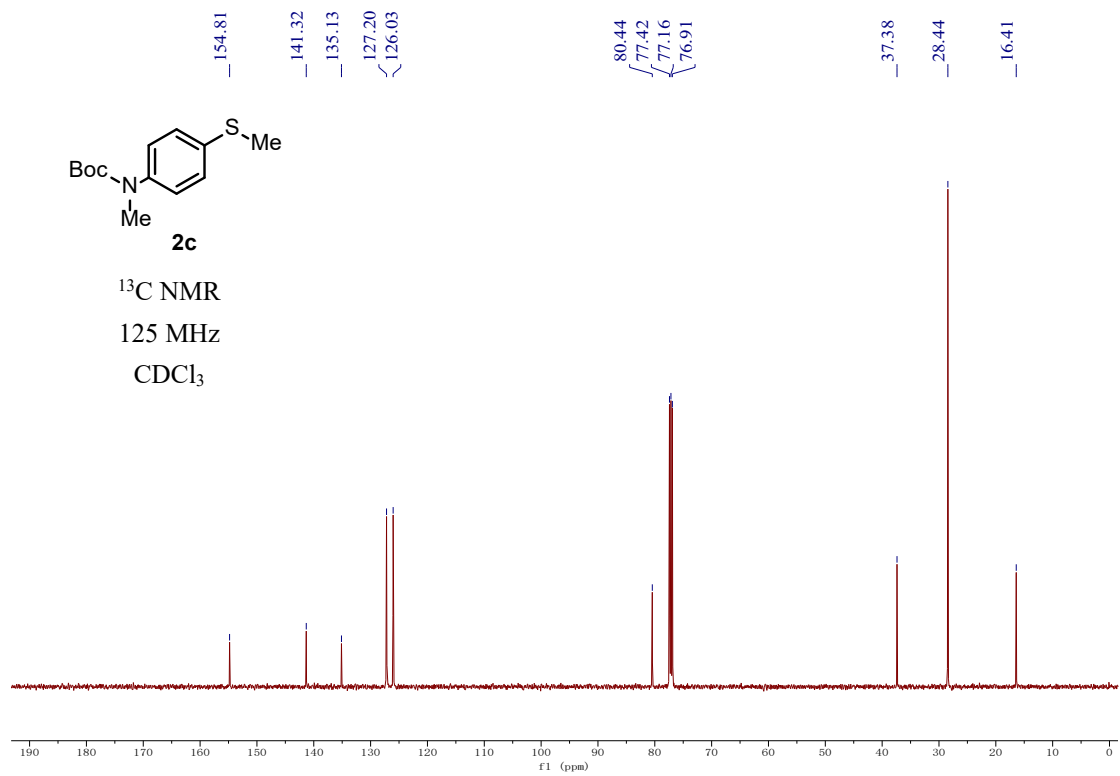

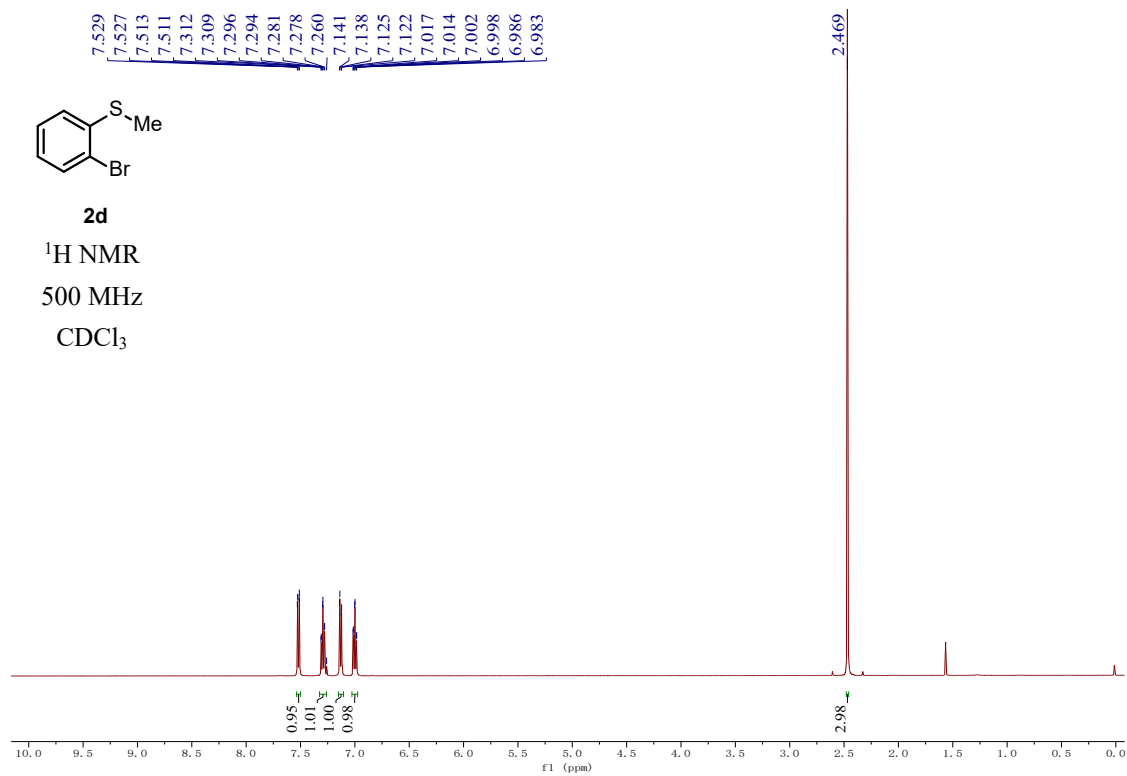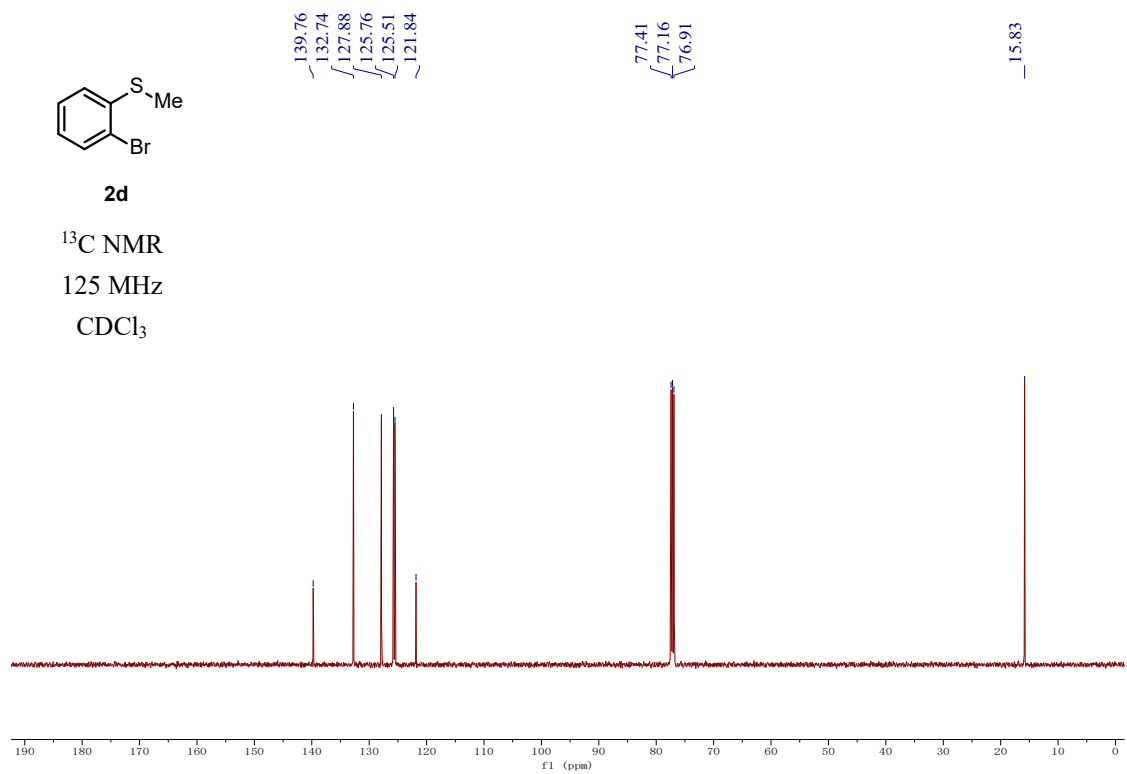



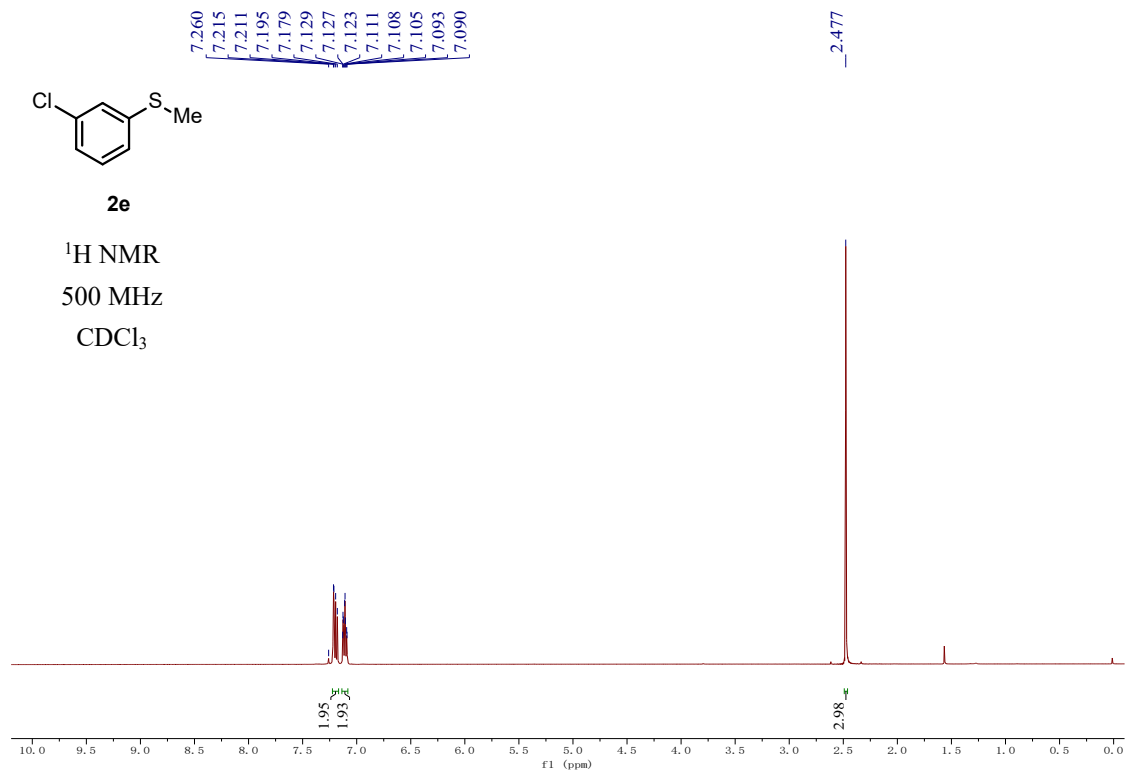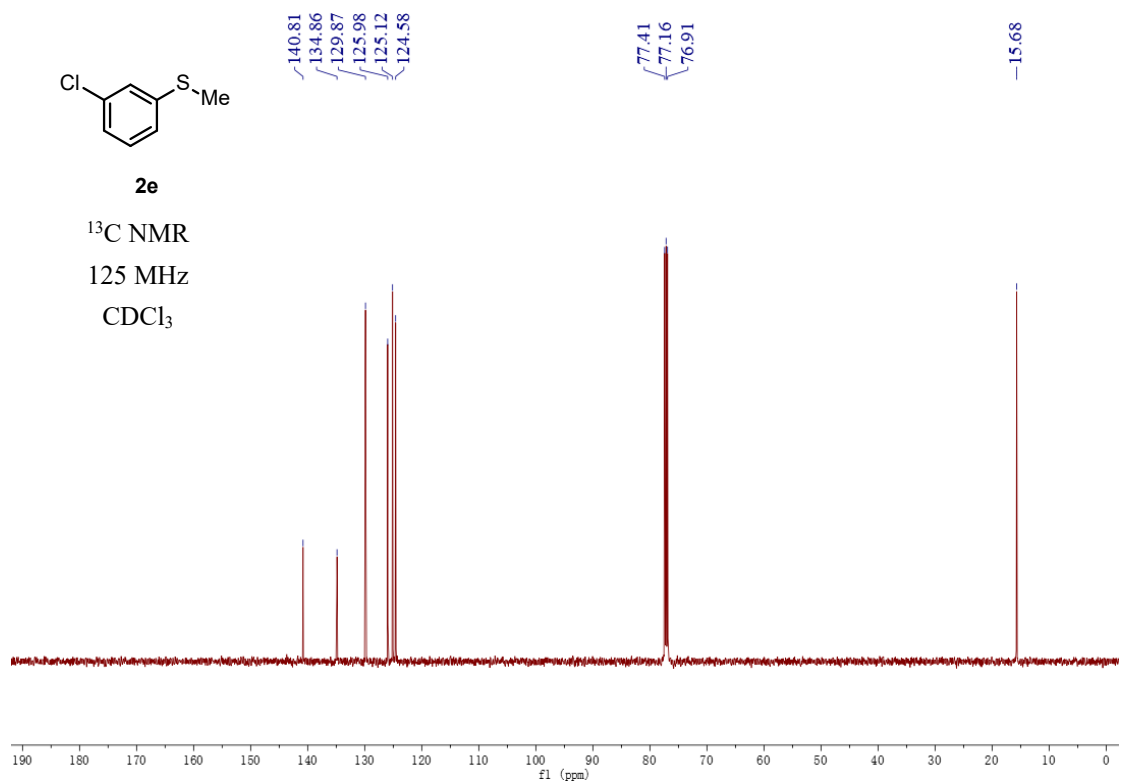

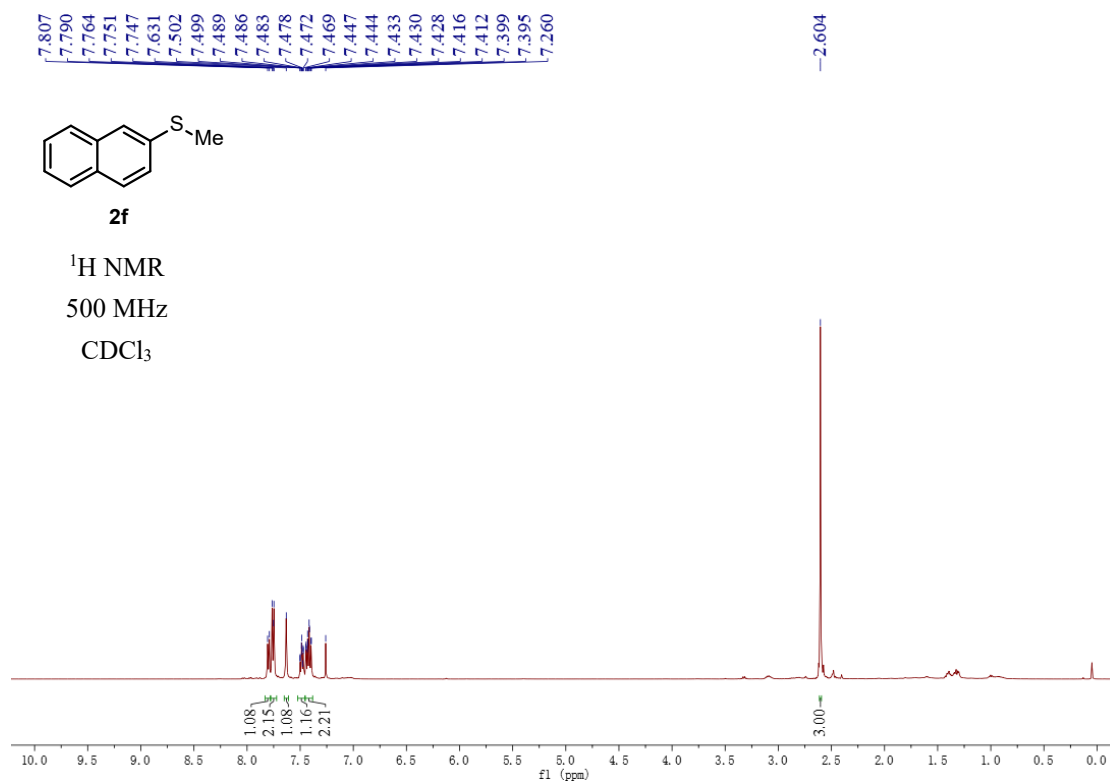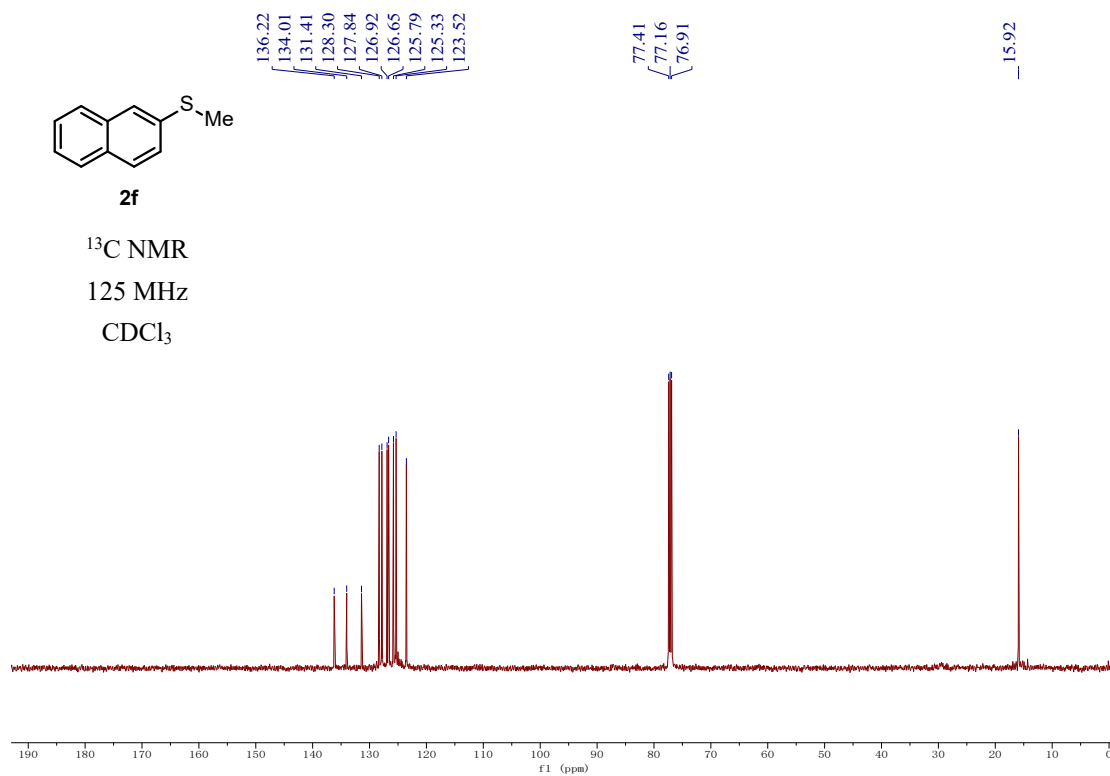

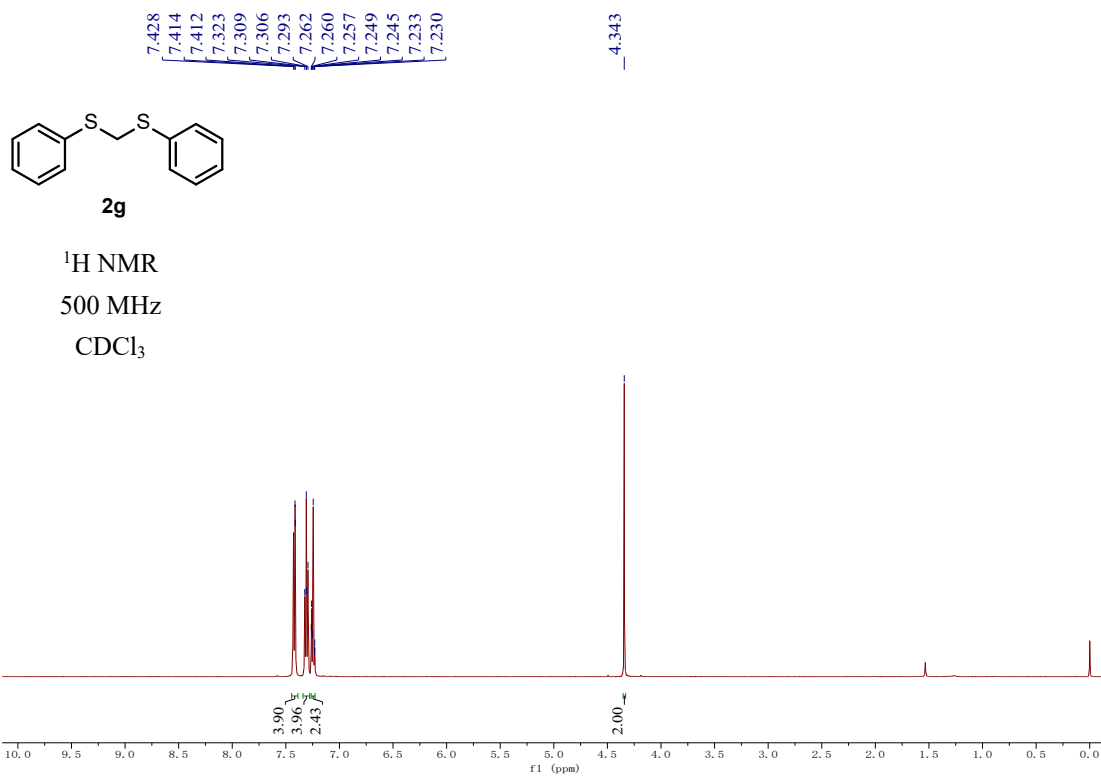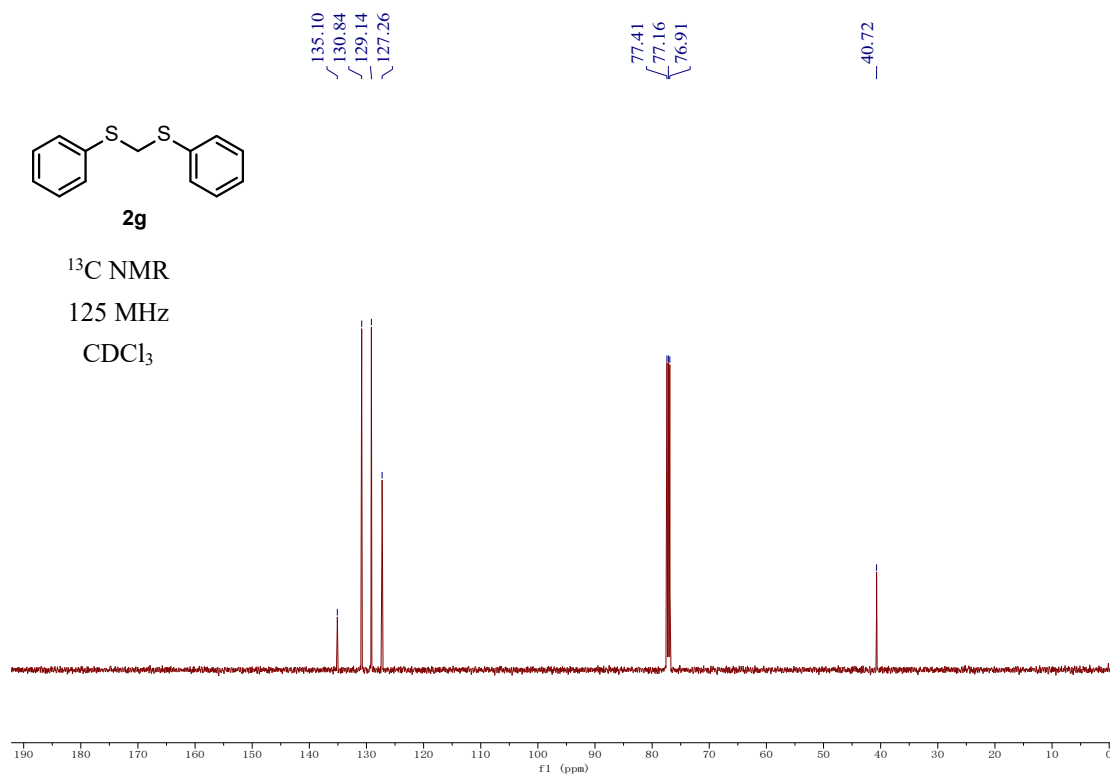

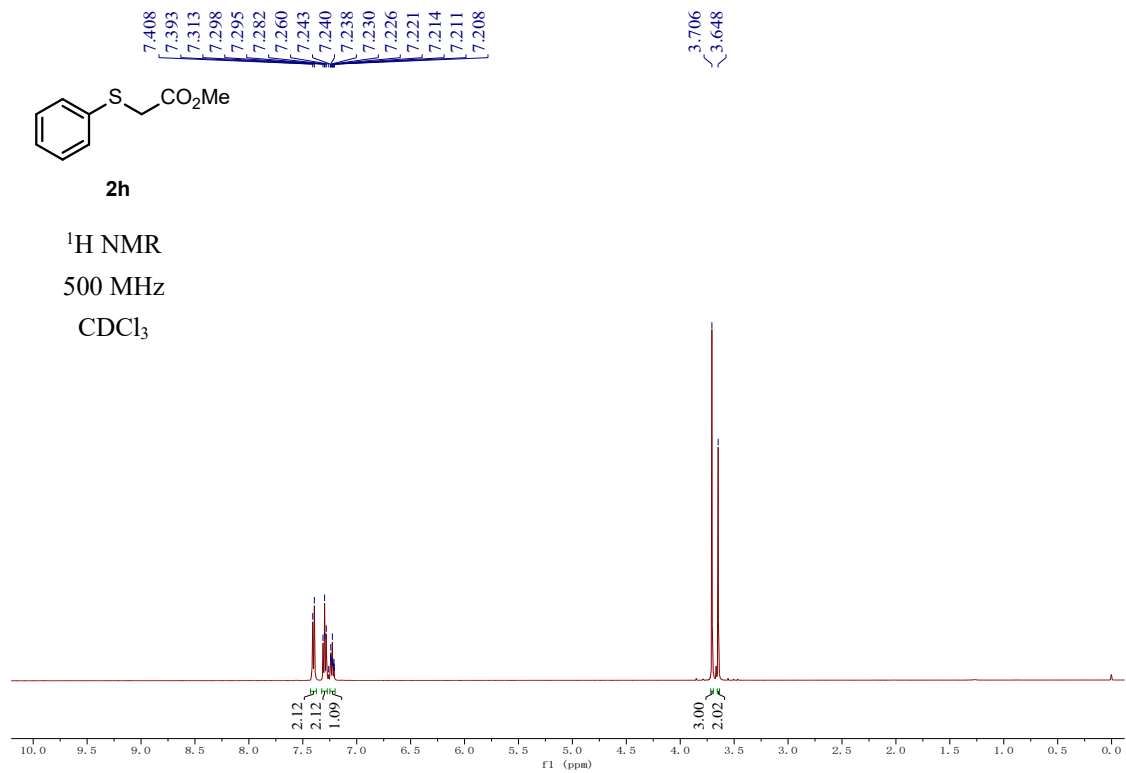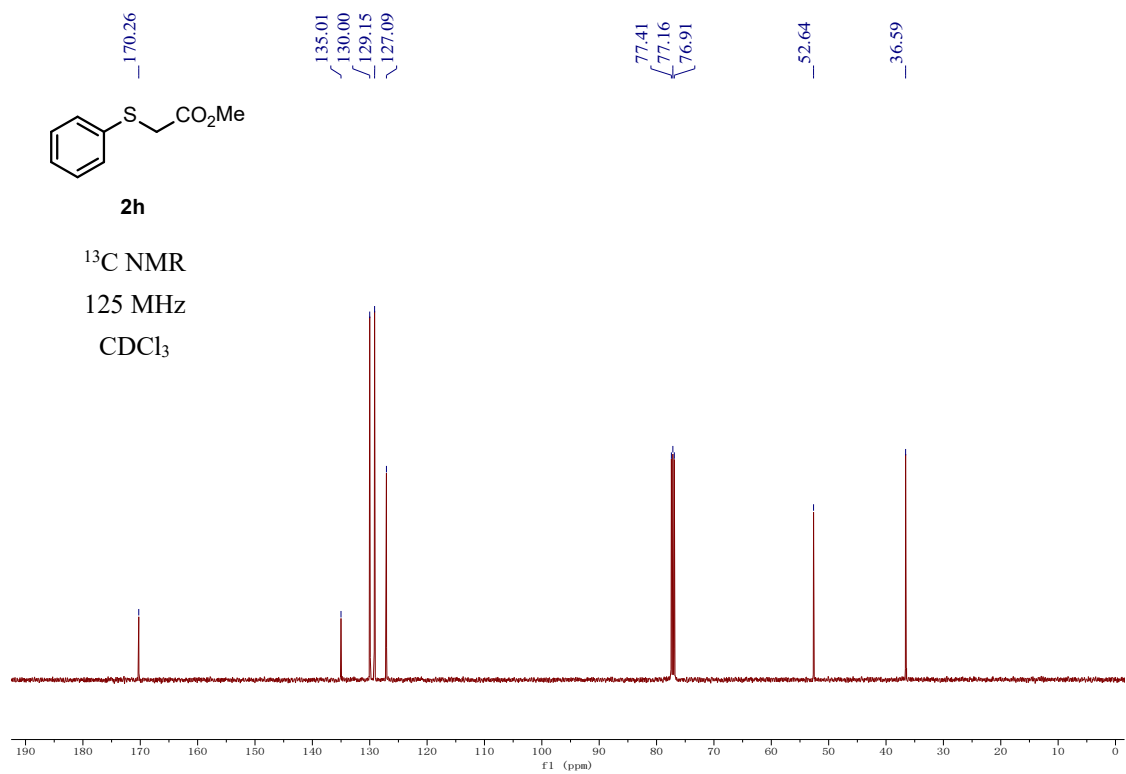

7.454  
7.439  
7.351  
7.341  
7.334  
7.323  
7.320  
7.287  
7.284  
7.270  
7.266  
7.258  
7.255  
7.243  
7.236  
7.222  
7.207  
6.950  
6.934  
5.649  
5.634  
5.111  
5.086  
5.076  
5.052  
4.893  
4.883  
4.877  
4.873  
4.867  
4.857  
3.611  
3.601  
3.583  
3.573  
3.547  
3.537  
3.519  
3.508

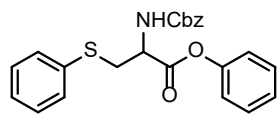

**2i**

<sup>1</sup>H NMR

500 MHz

CDCl<sub>3</sub>

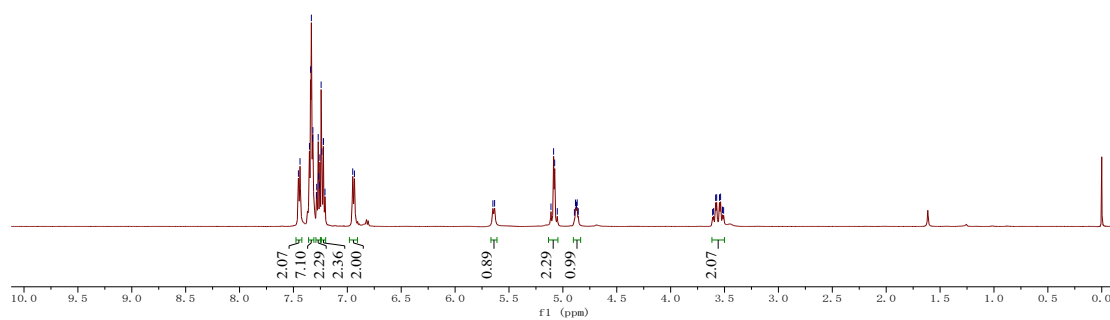

169.16  
155.65  
150.35  
136.13  
134.56  
131.23  
129.57  
129.36  
128.67  
128.37  
128.23  
127.40  
126.37  
121.36  
77.42  
77.16  
76.91  
67.30  
54.28  
37.19

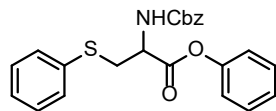

**2i**

<sup>13</sup>C NMR

125 MHz

CDCl<sub>3</sub>

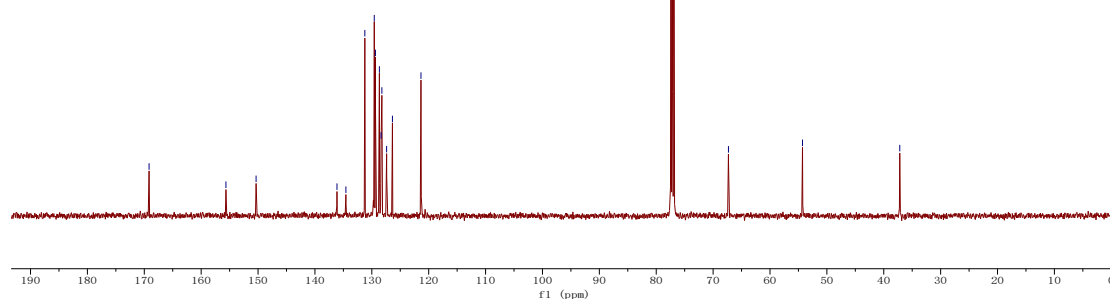

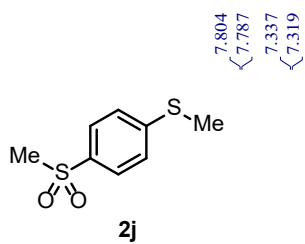

<sup>1</sup>H NMR  
 500 MHz  
 CDCl<sub>3</sub>

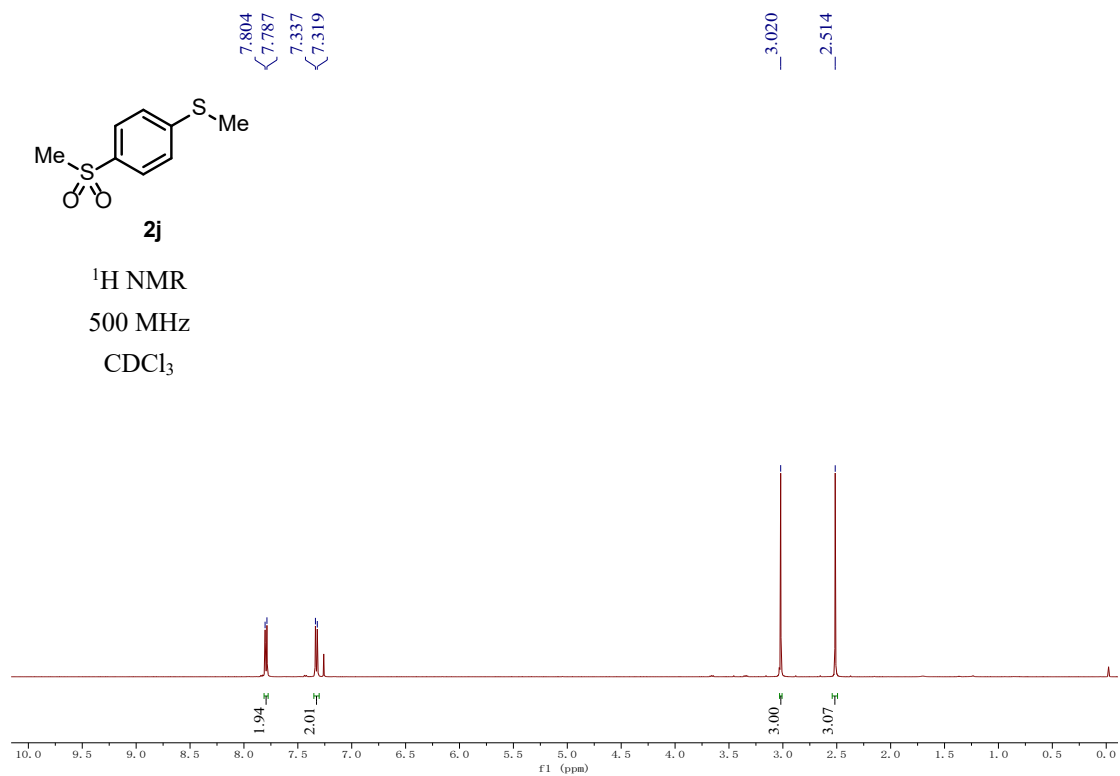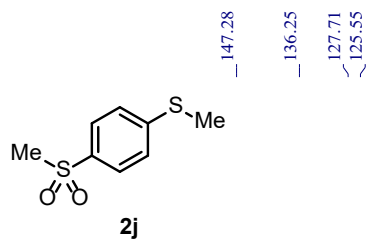

<sup>13</sup>C NMR  
 125 MHz  
 CDCl<sub>3</sub>

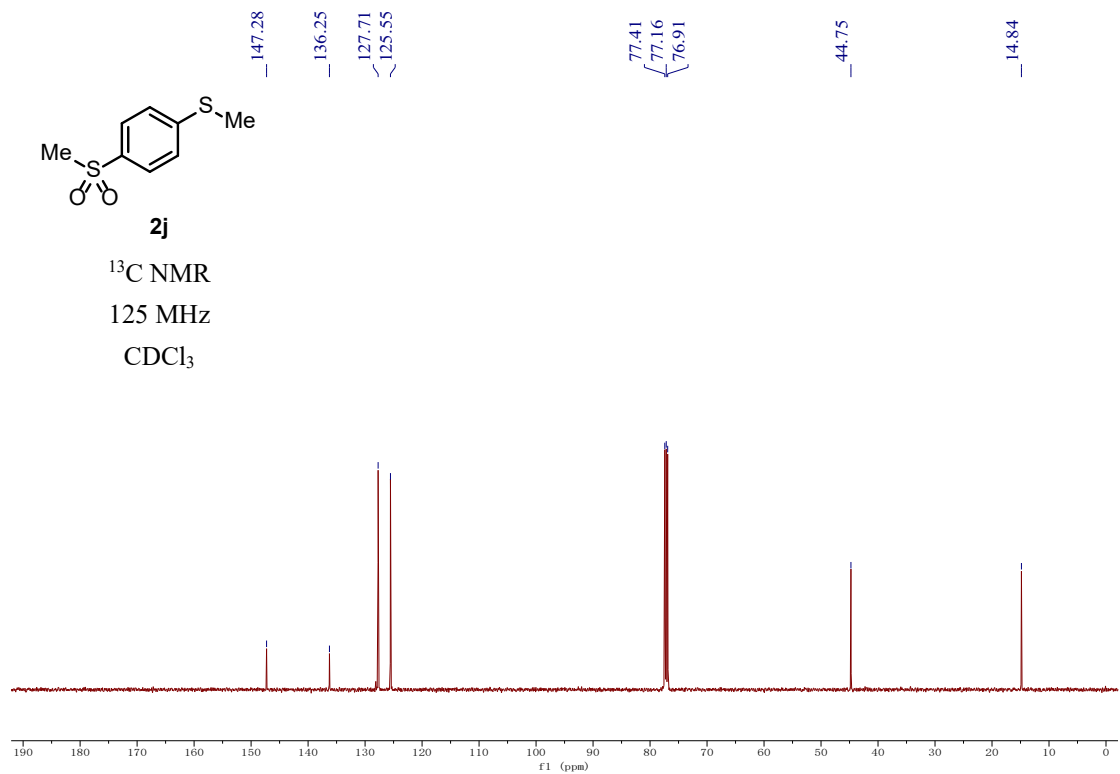

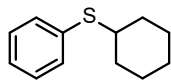

**2k**

<sup>1</sup>H NMR  
500 MHz  
CDCl<sub>3</sub>

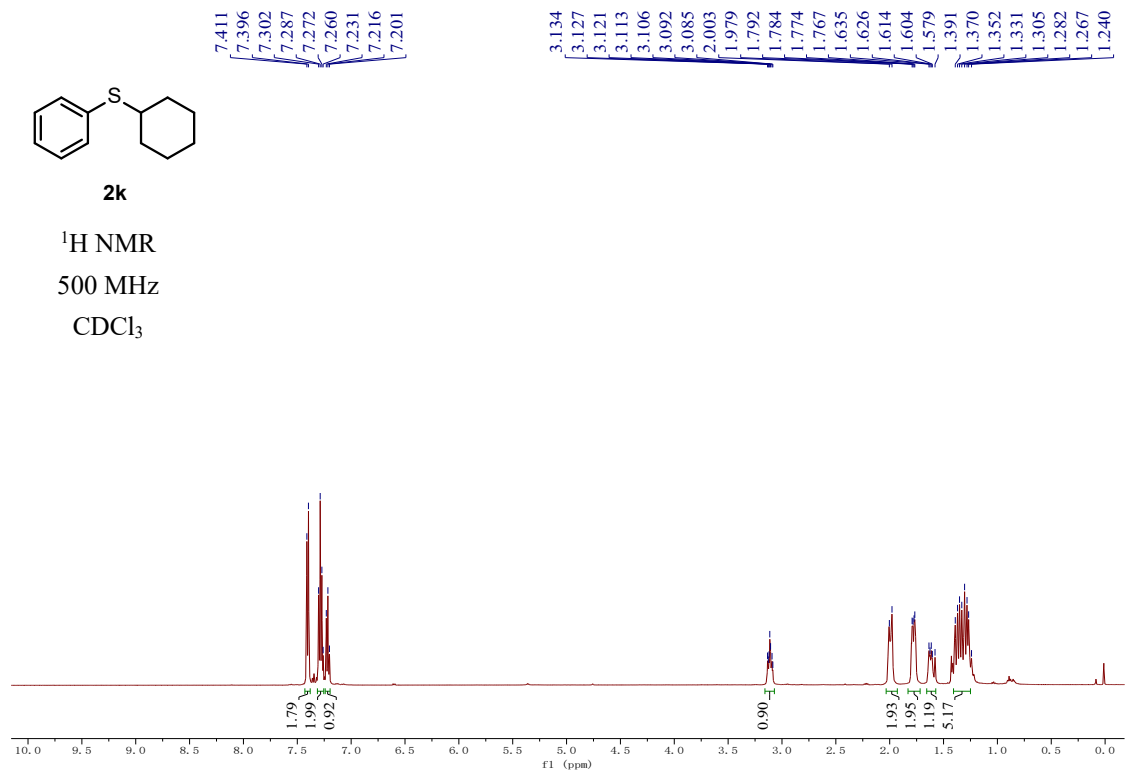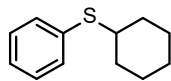

**2k**

<sup>13</sup>C NMR  
125 MHz  
CDCl<sub>3</sub>

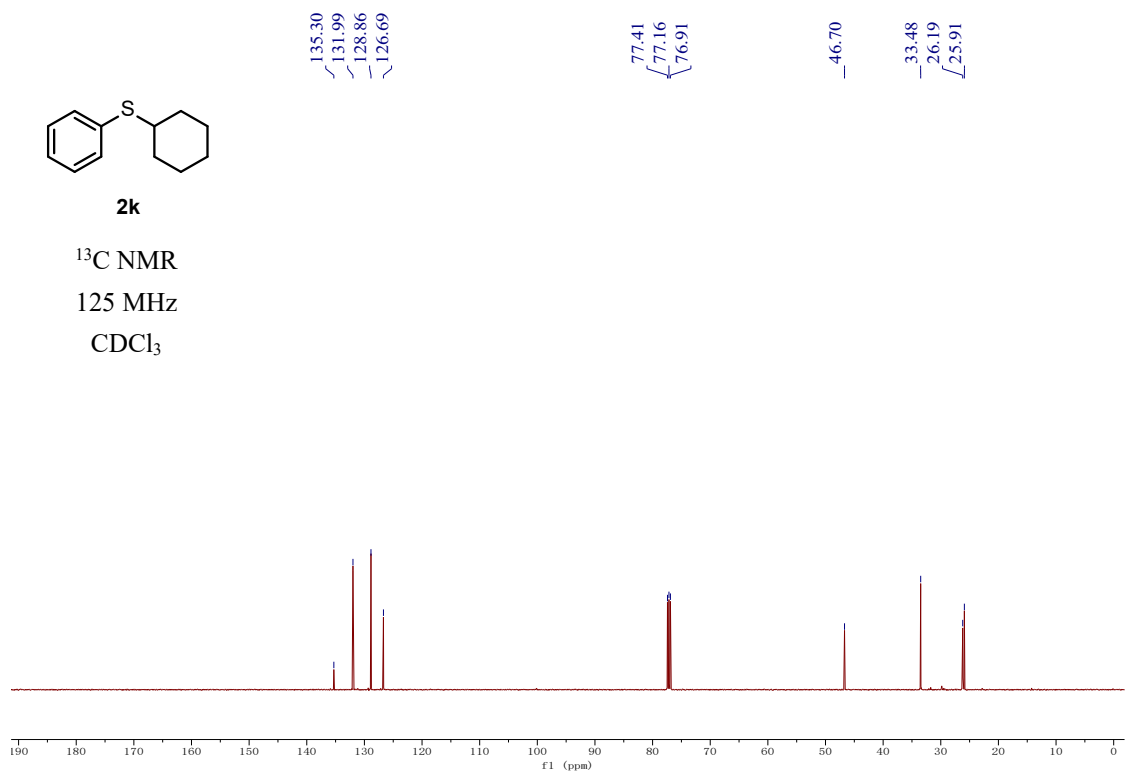

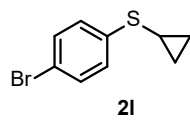

<sup>1</sup>H NMR  
500 MHz  
CDCl<sub>3</sub>

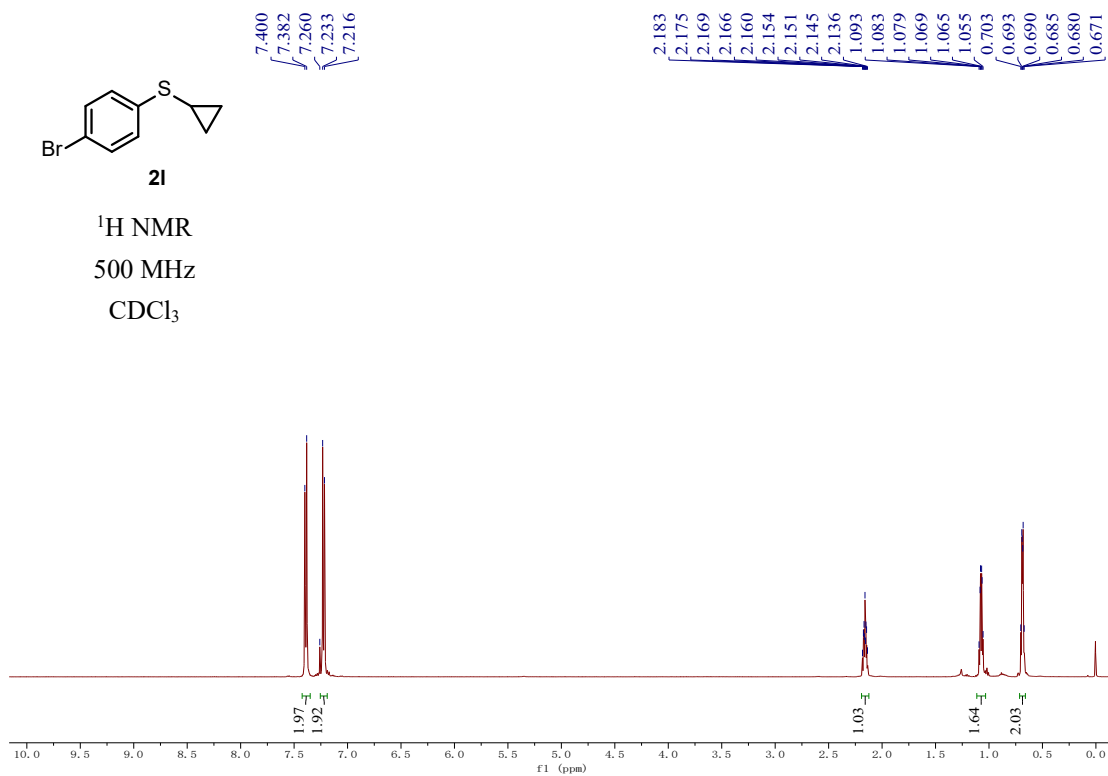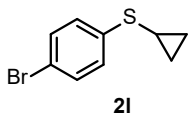

<sup>13</sup>C NMR  
125 MHz  
CDCl<sub>3</sub>

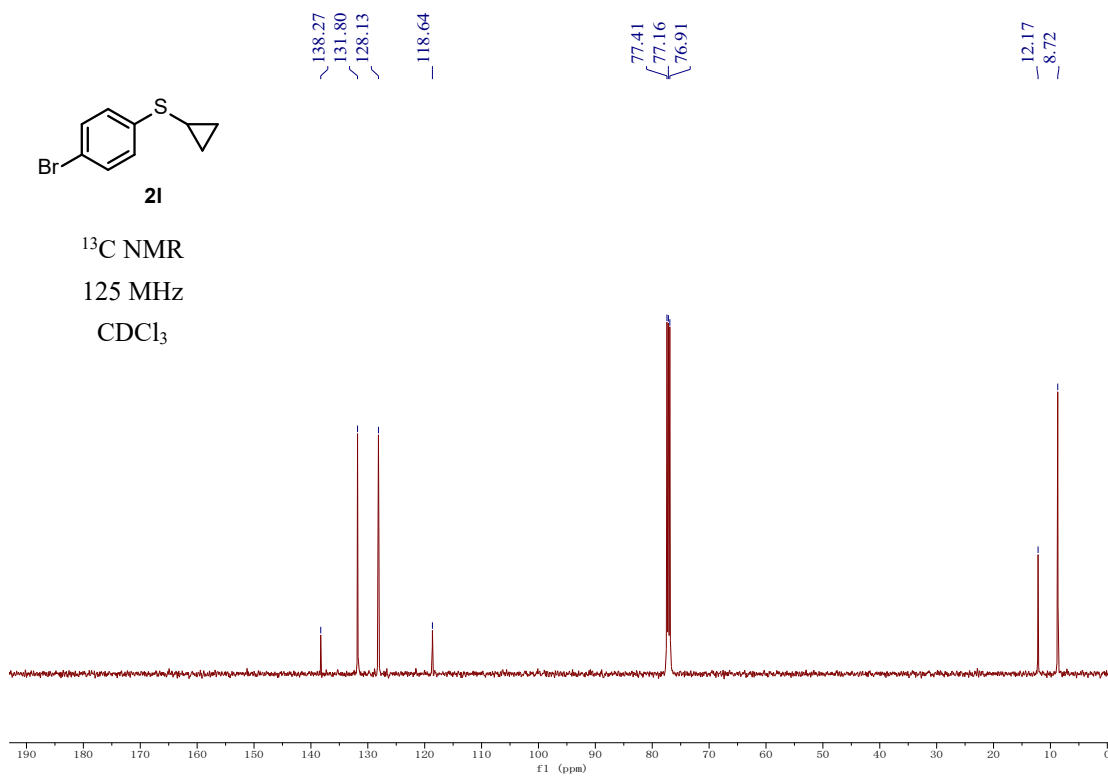



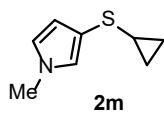

<sup>1</sup>H NMR  
 500 MHz  
 CDCl<sub>3</sub>

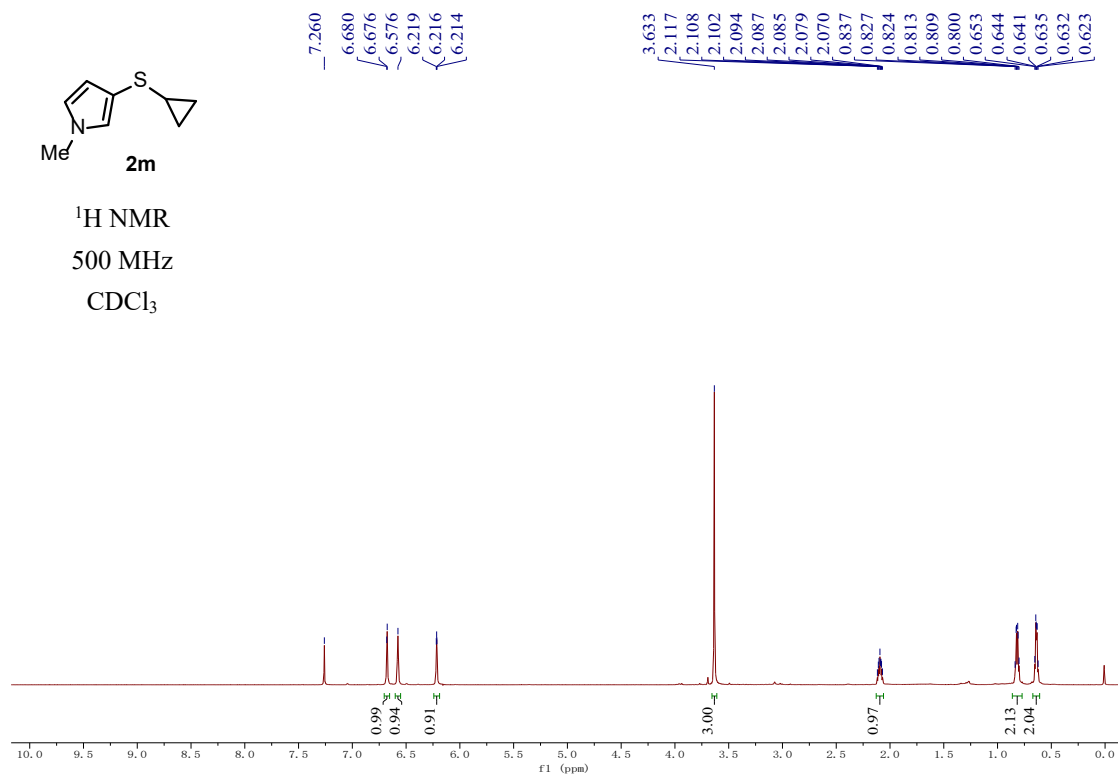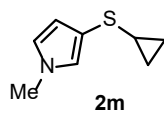

<sup>13</sup>C NMR  
 125 MHz  
 CDCl<sub>3</sub>

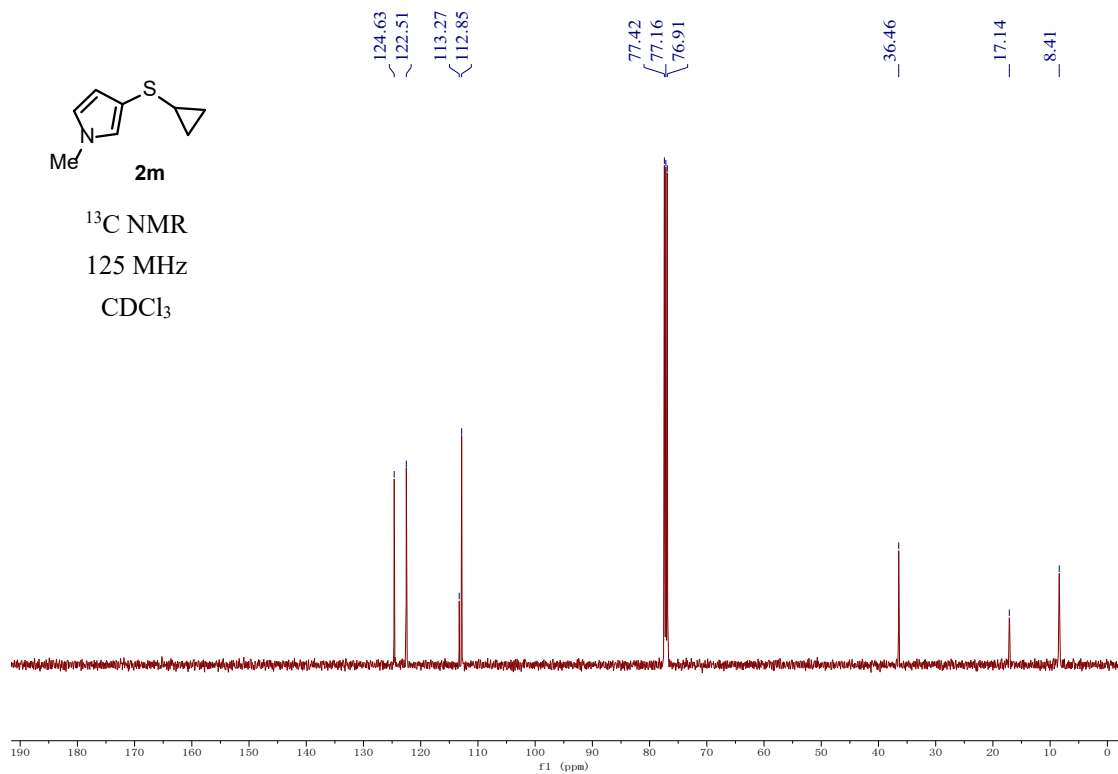

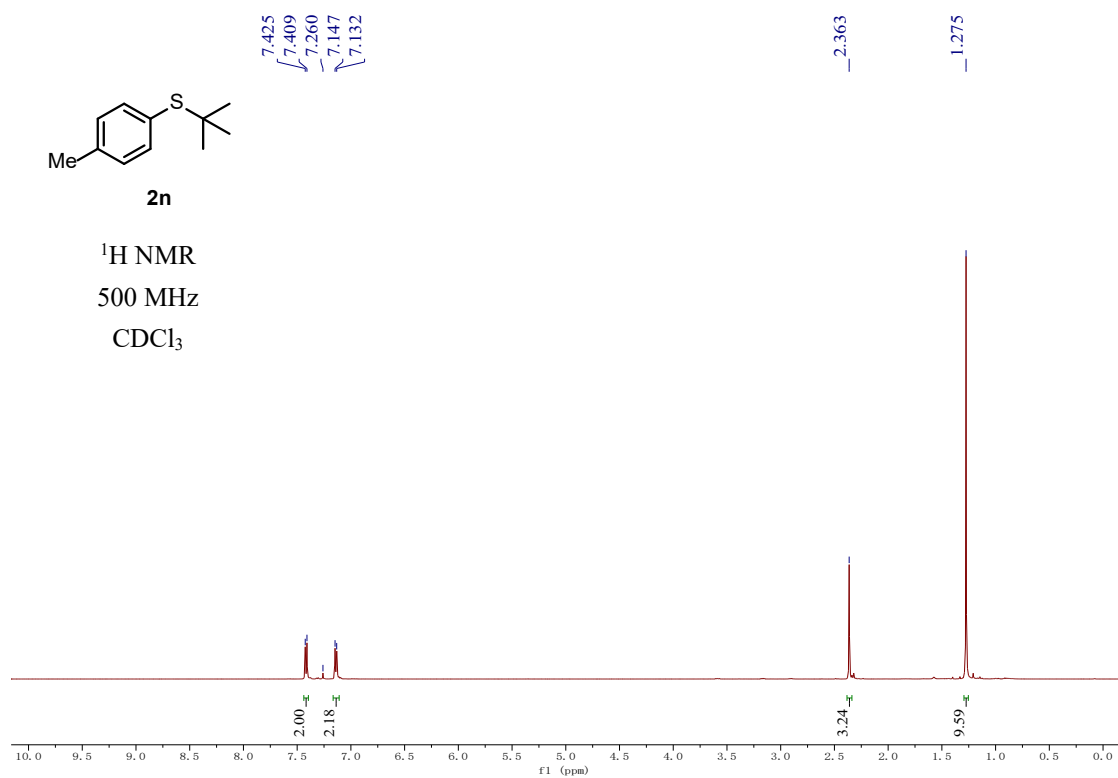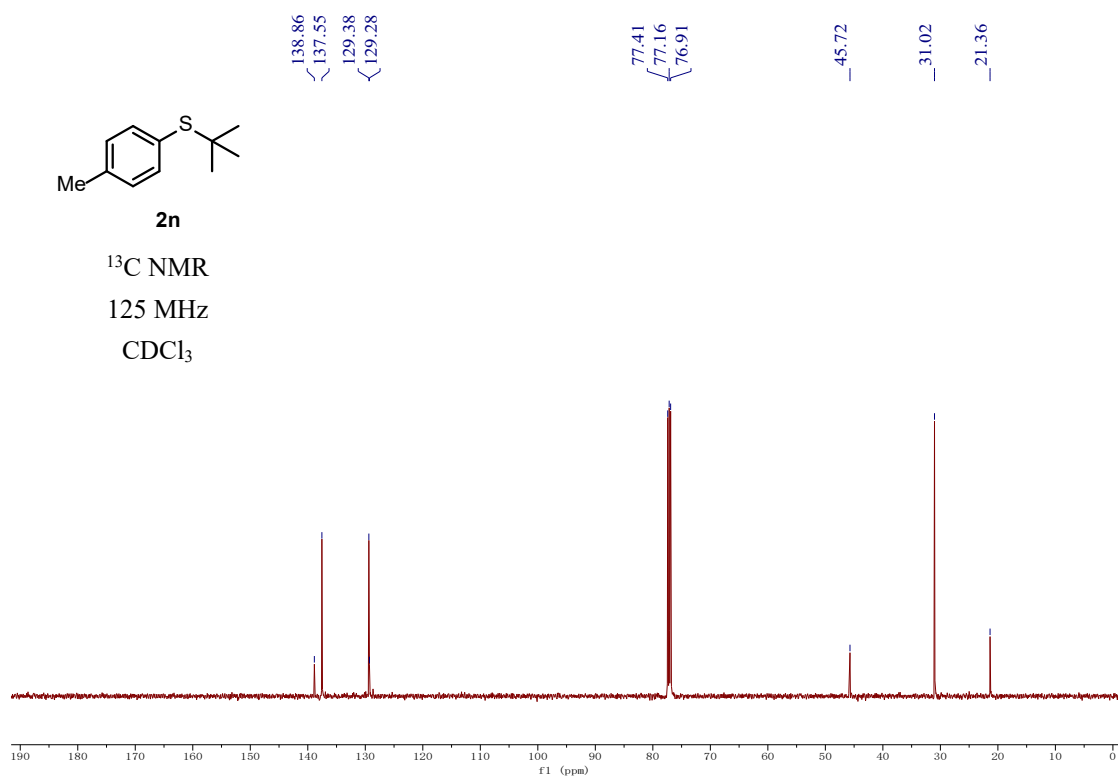

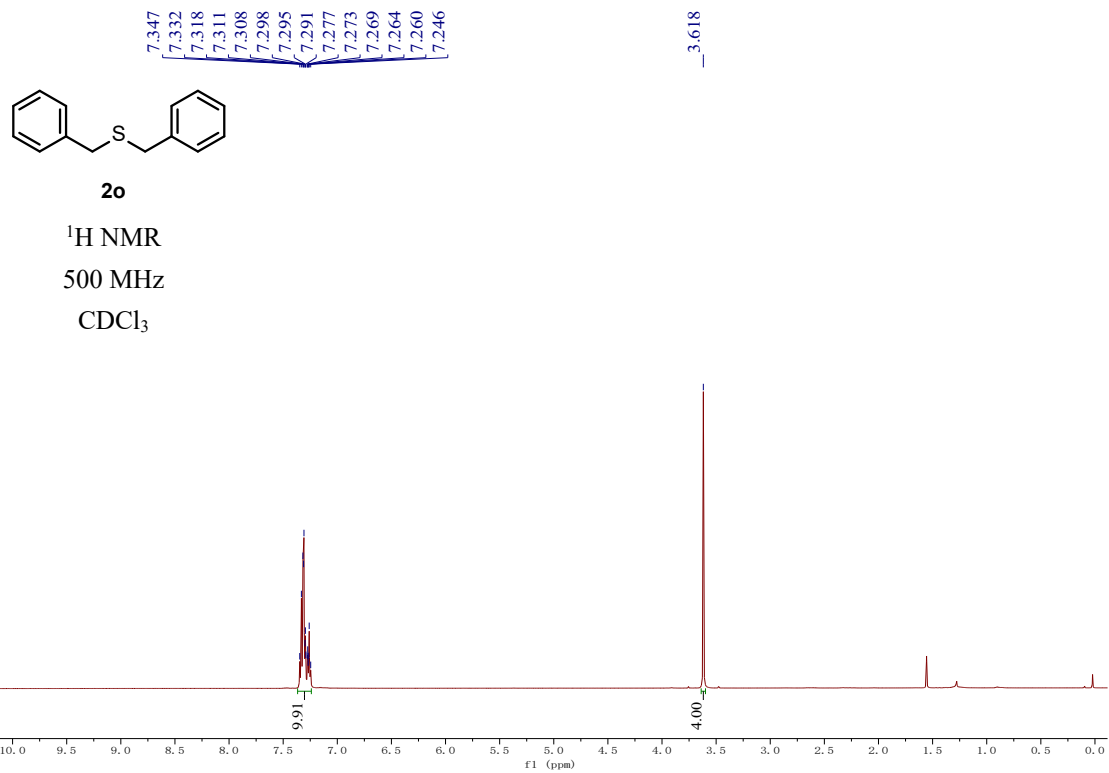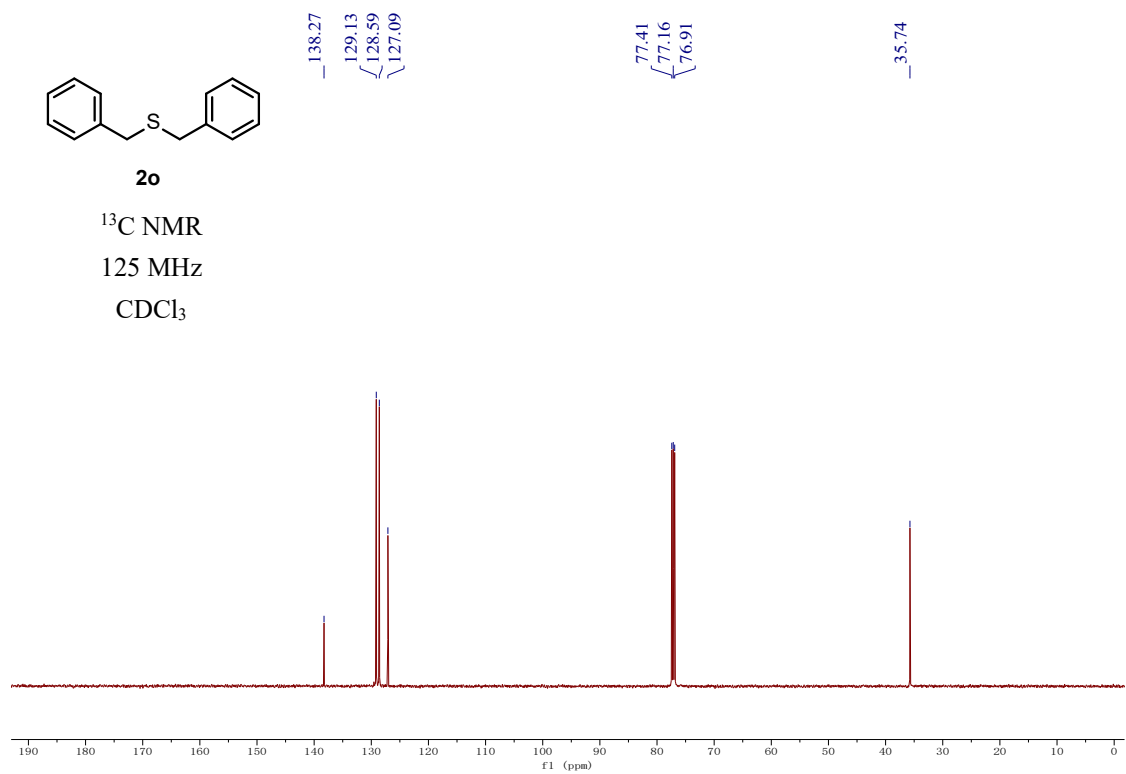

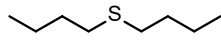

**2p**

<sup>1</sup>H NMR

500 MHz

CDCl<sub>3</sub>

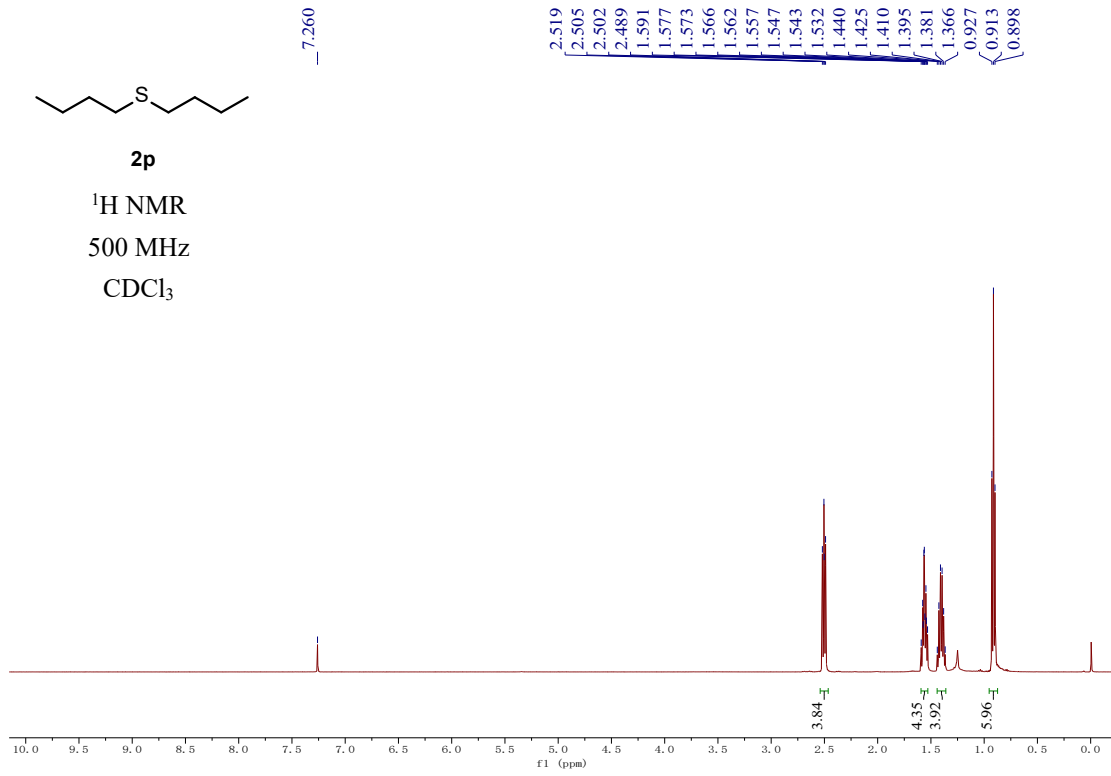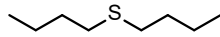

**2p**

<sup>13</sup>C NMR

125 MHz

CDCl<sub>3</sub>

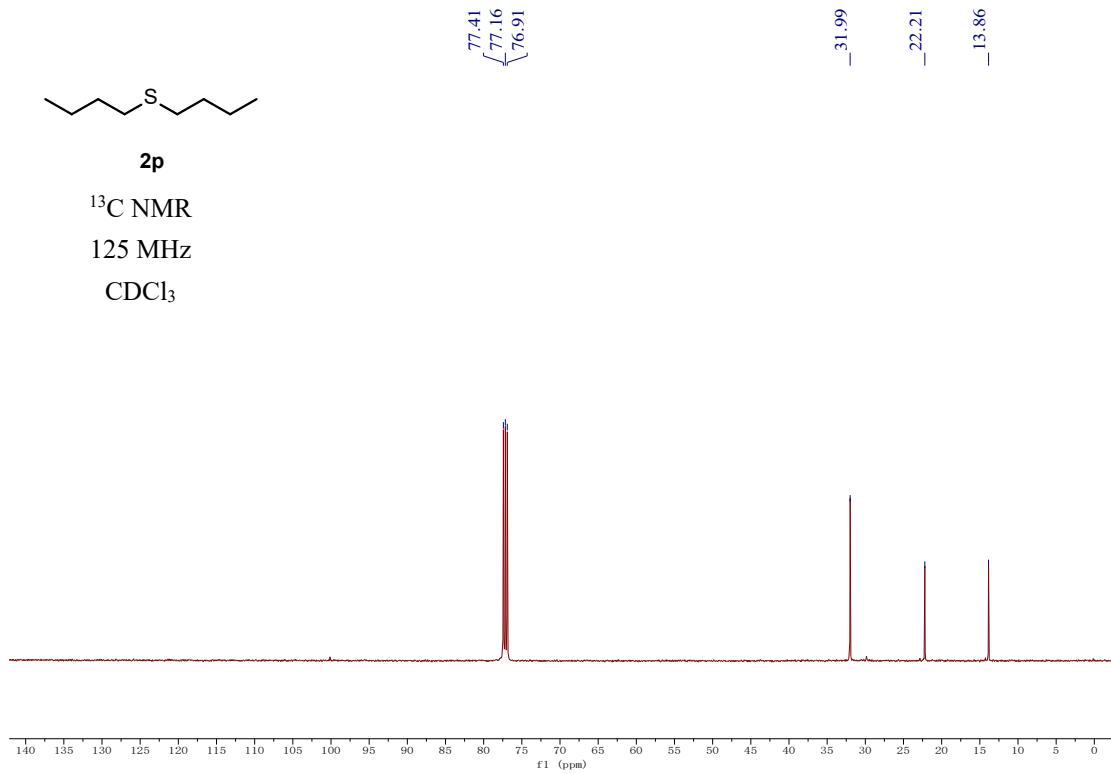

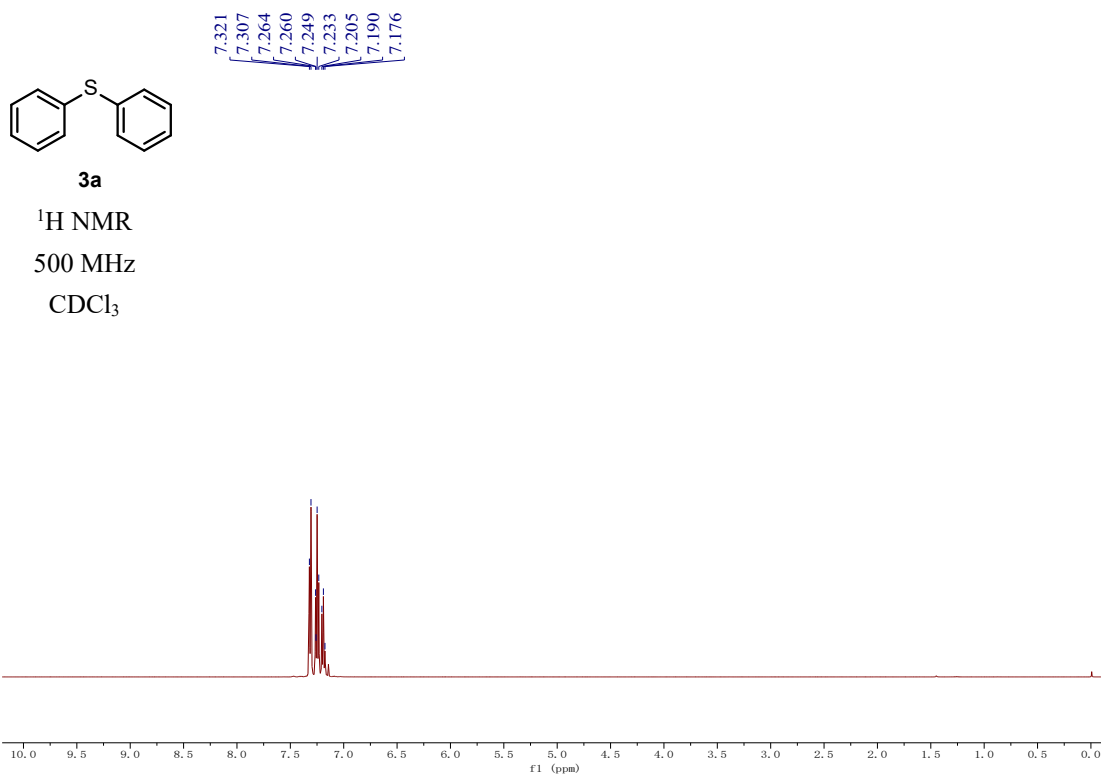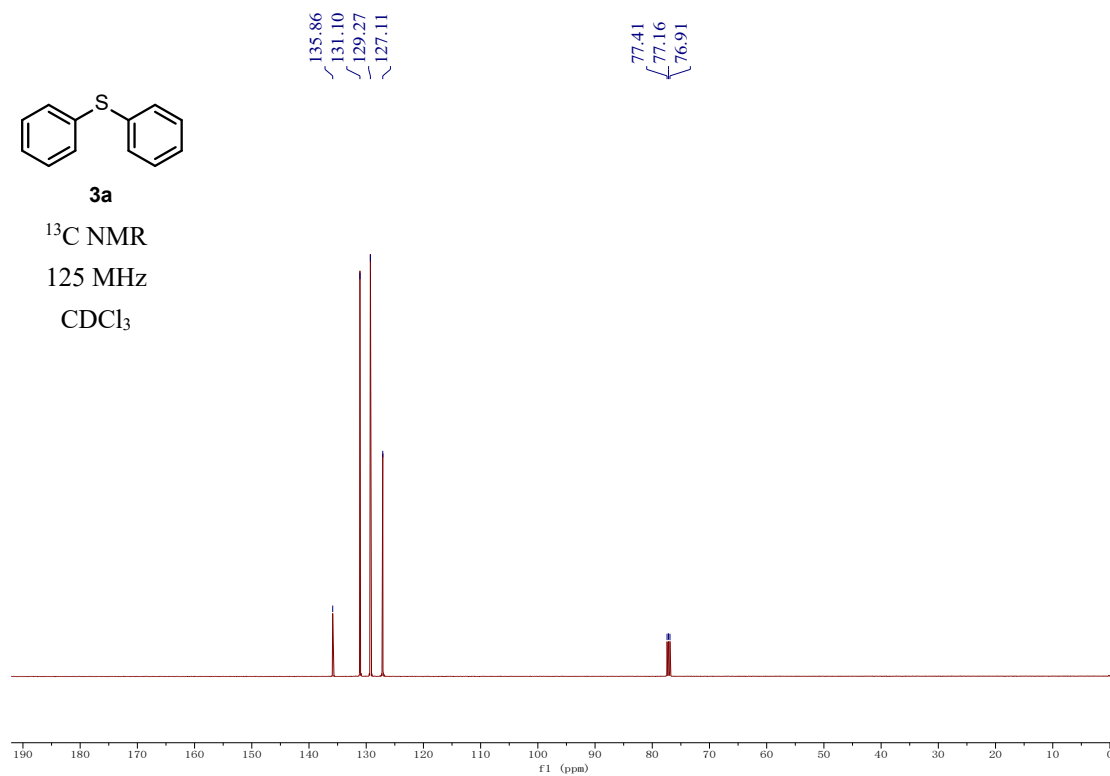

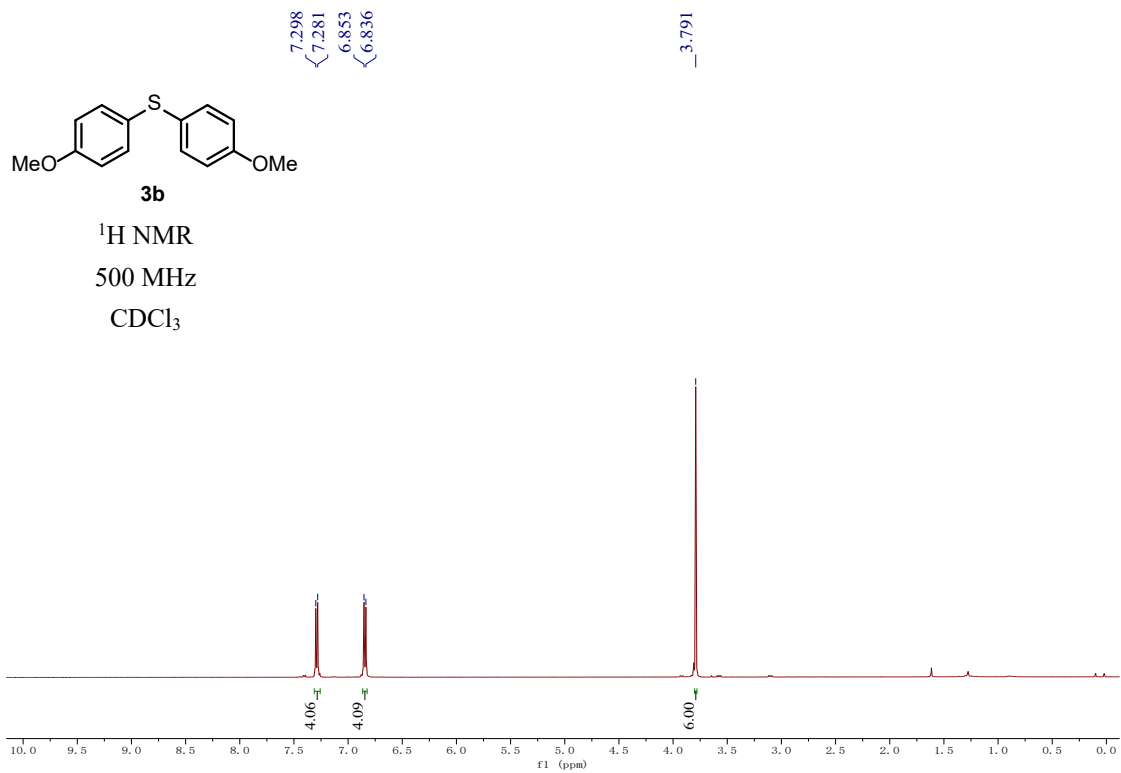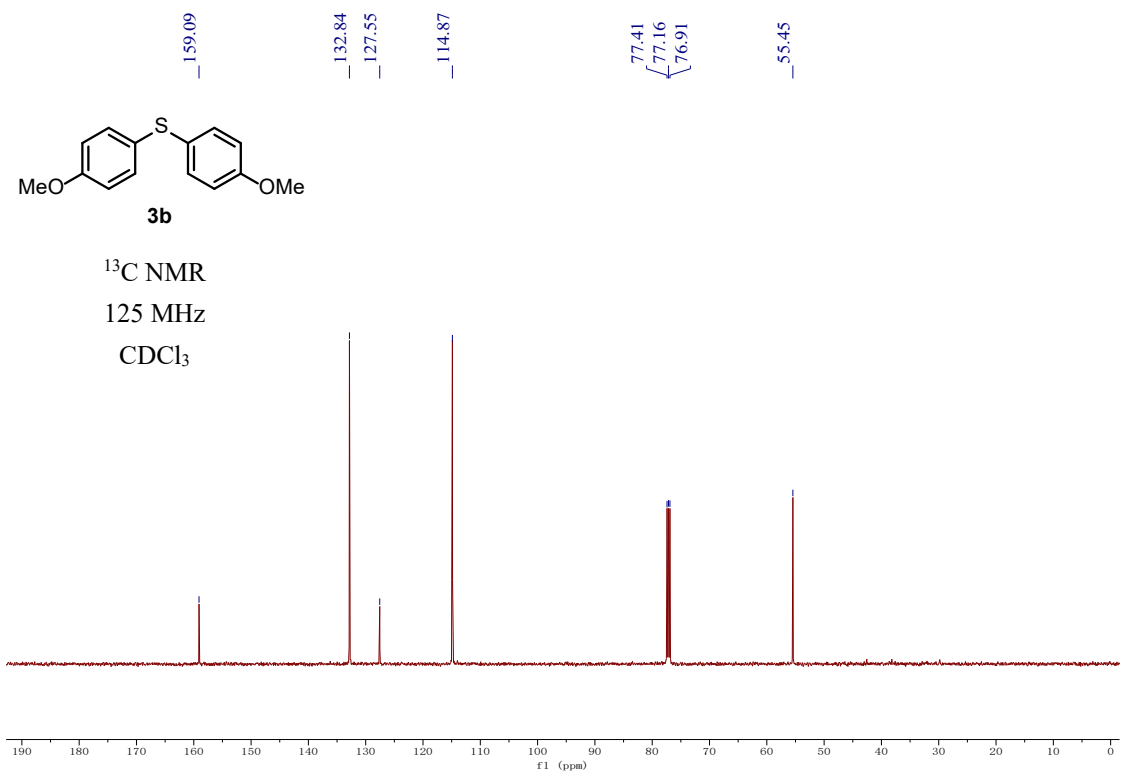

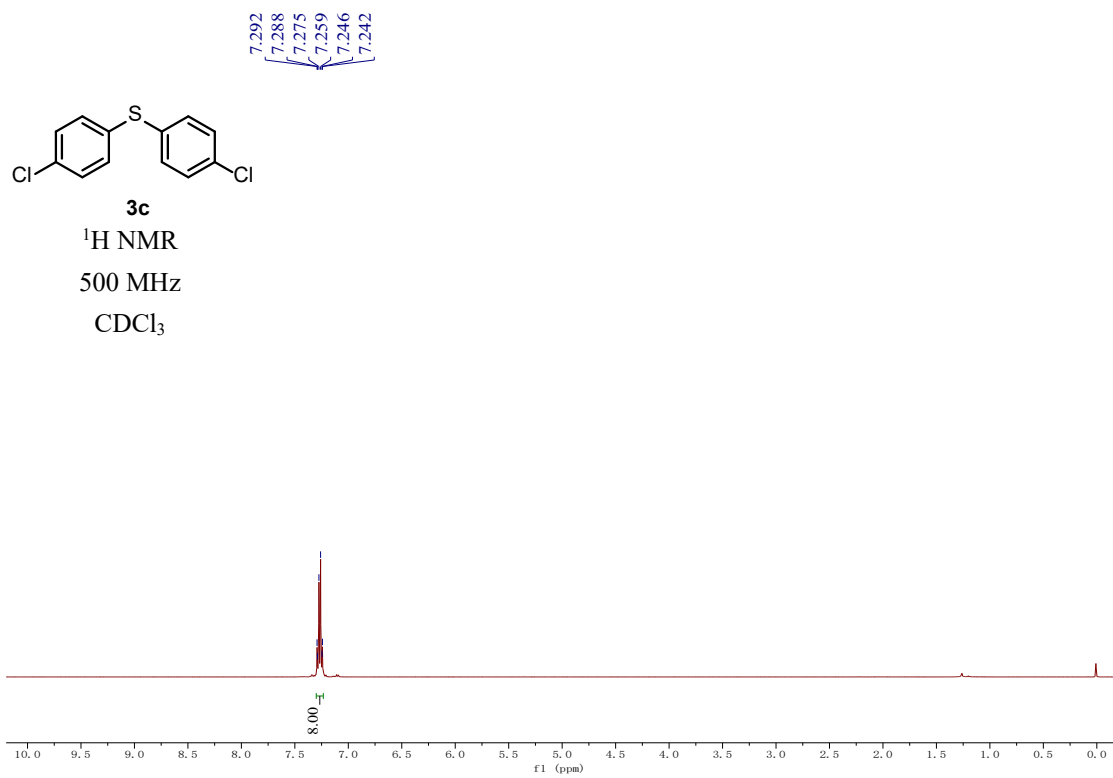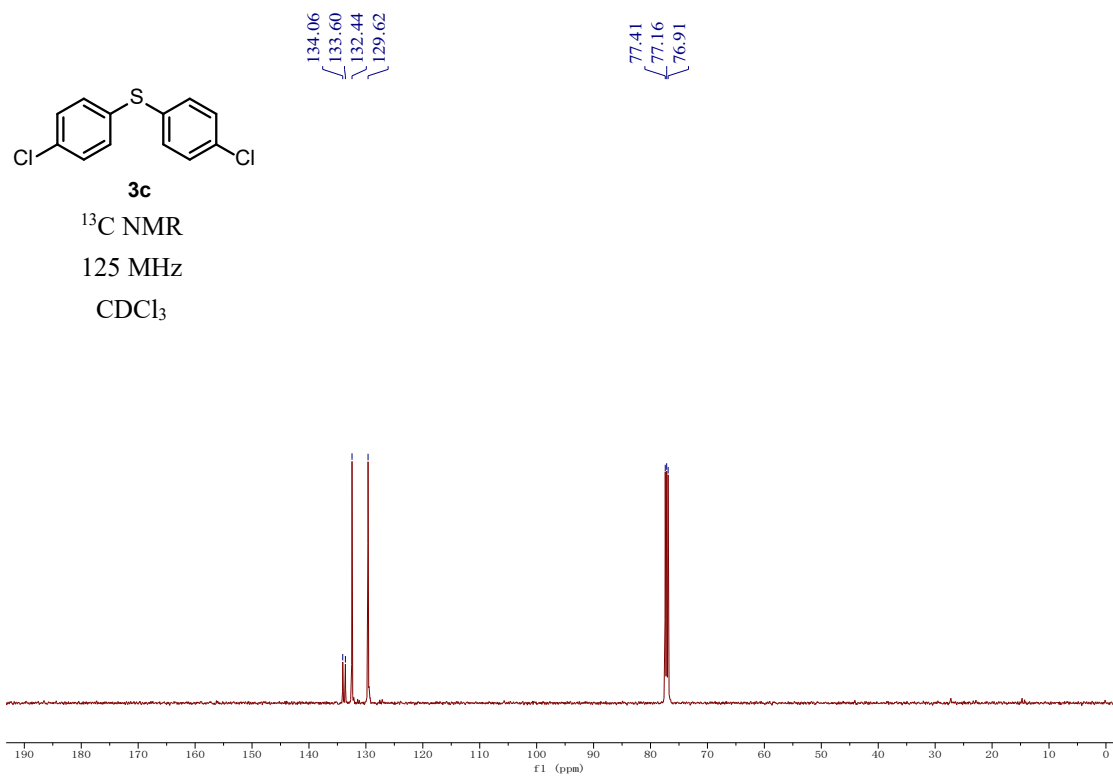

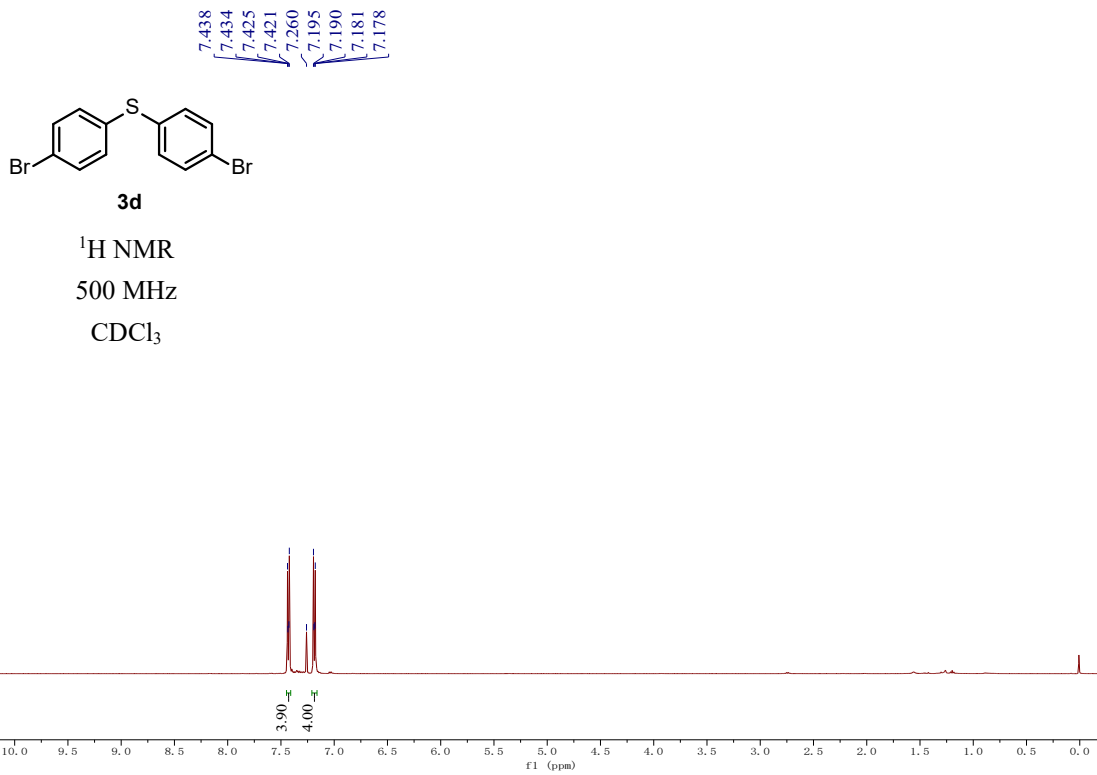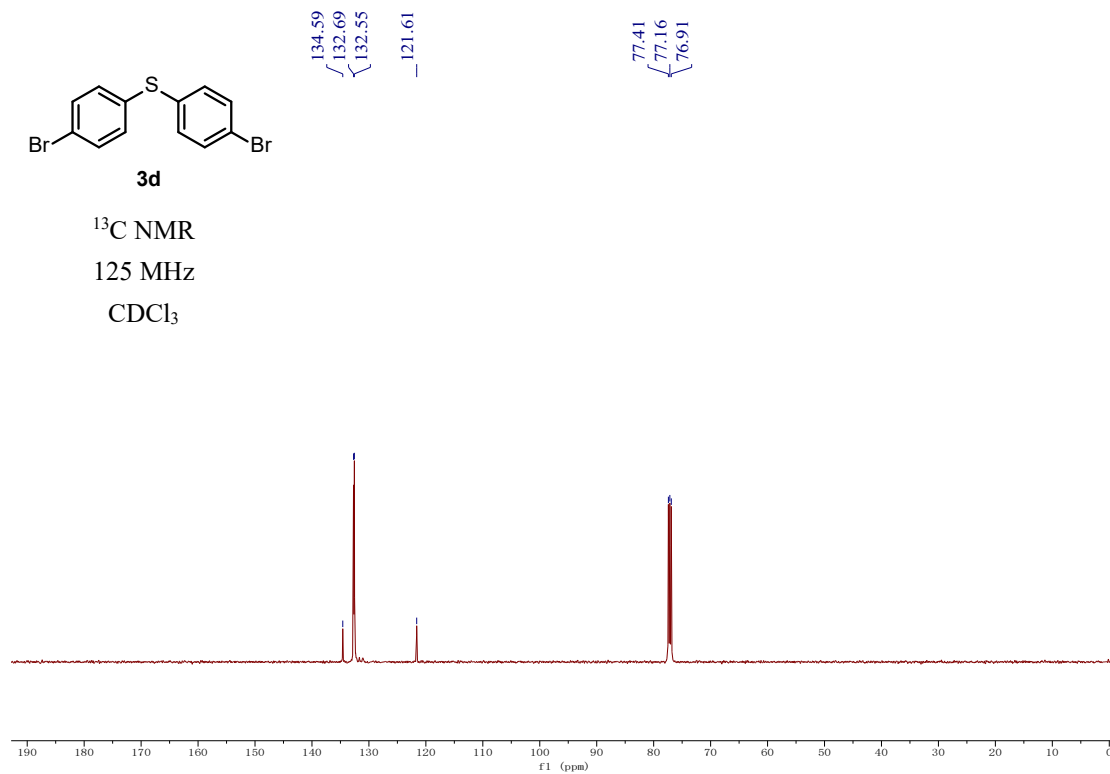



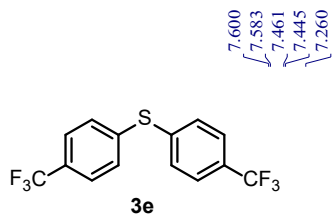

<sup>1</sup>H NMR  
500 MHz  
CDCl<sub>3</sub>

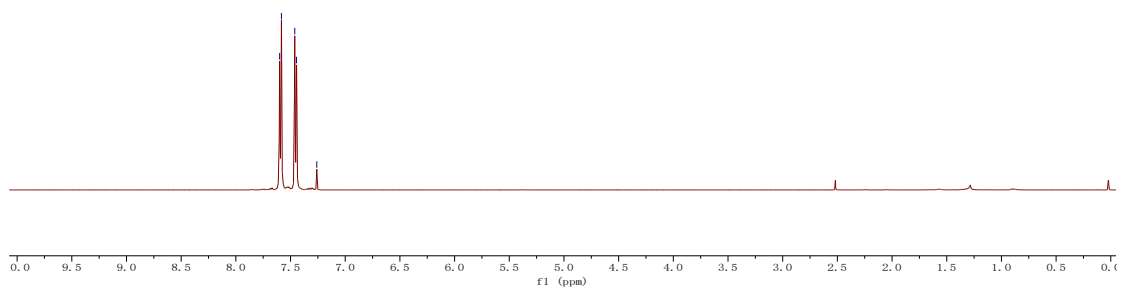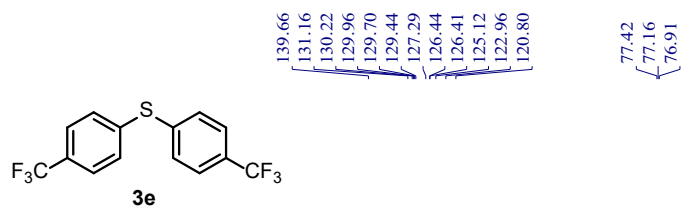

<sup>13</sup>C NMR  
125 MHz  
CDCl<sub>3</sub>

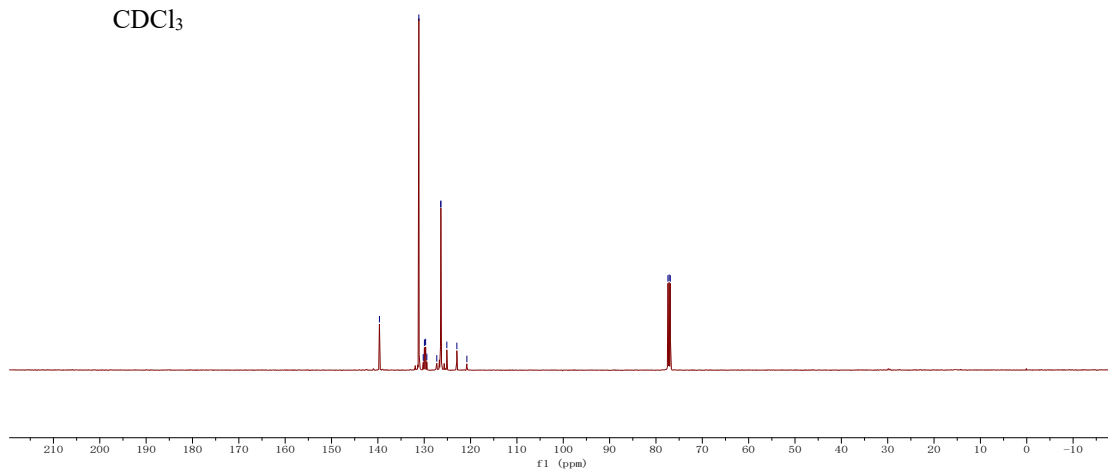

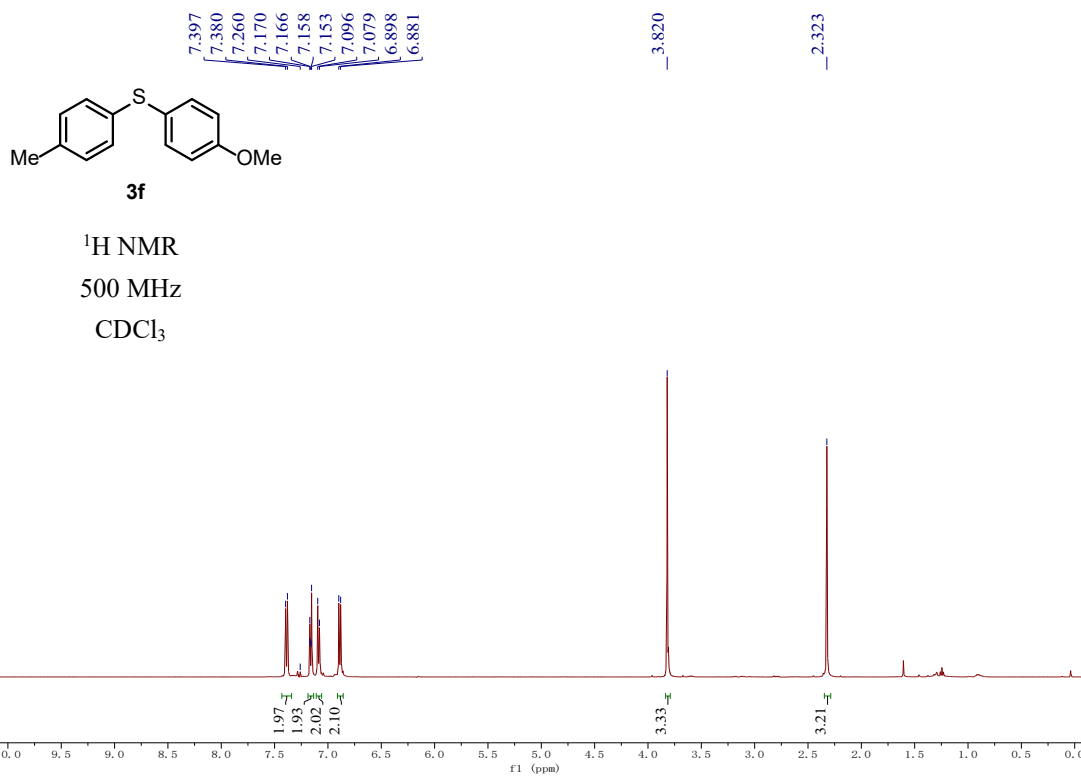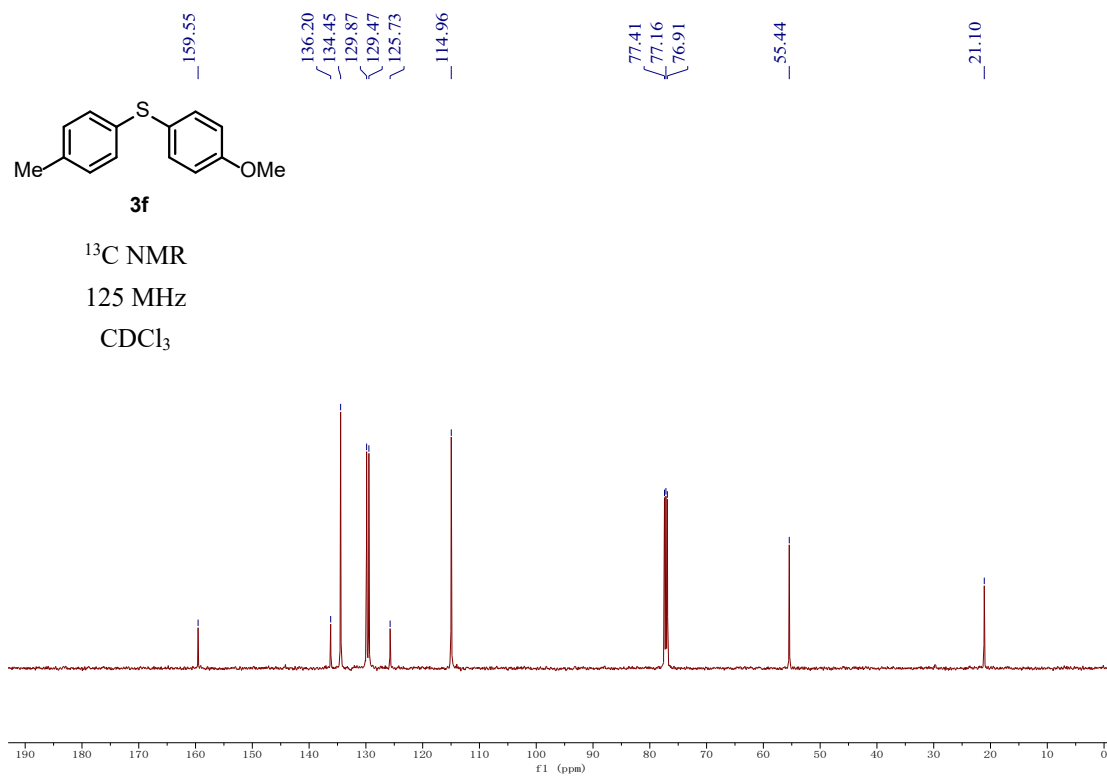

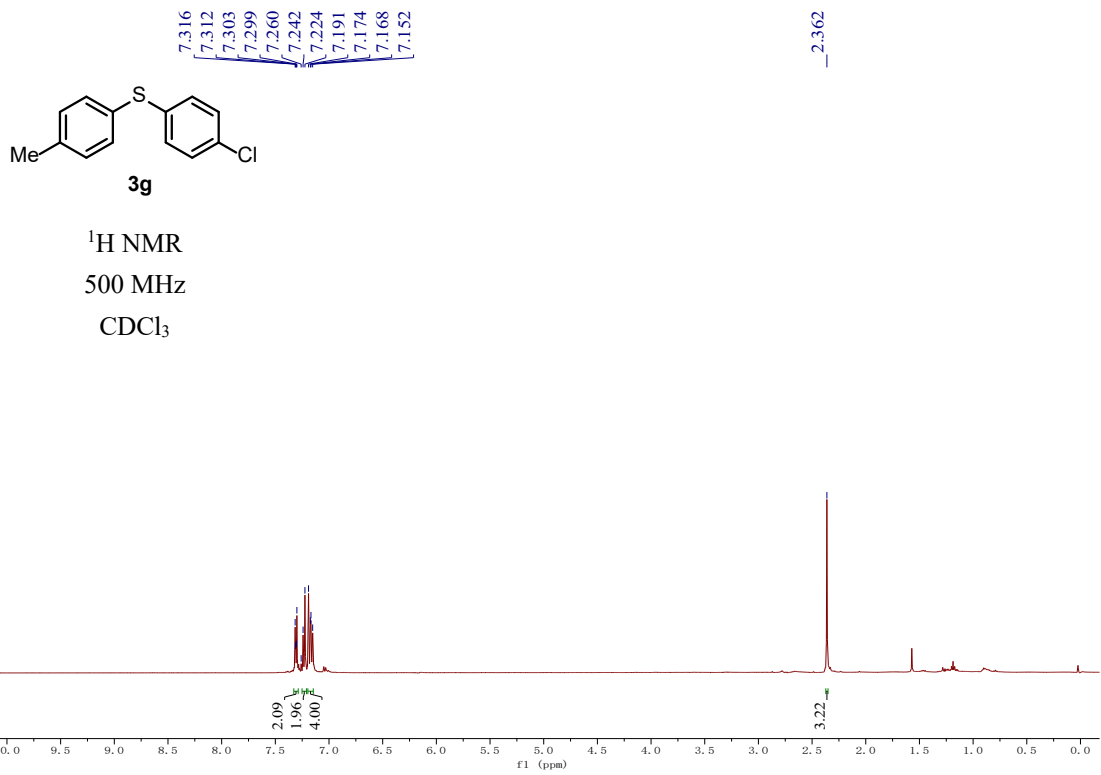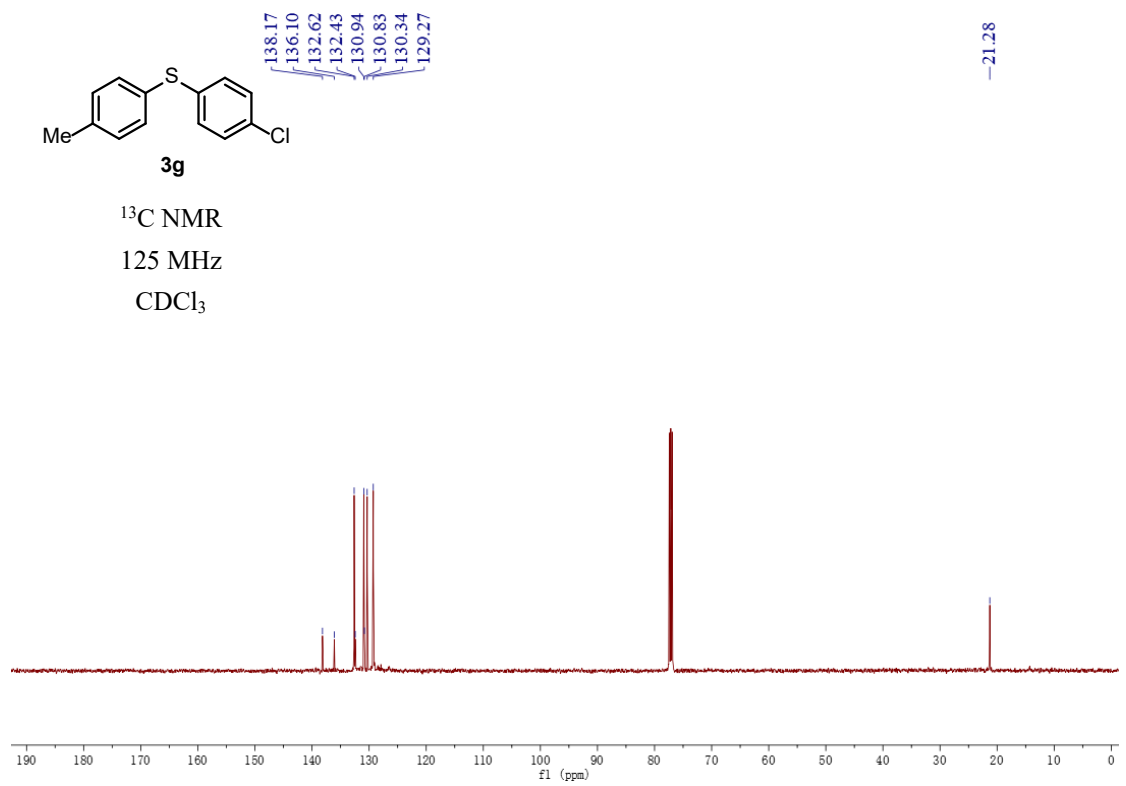

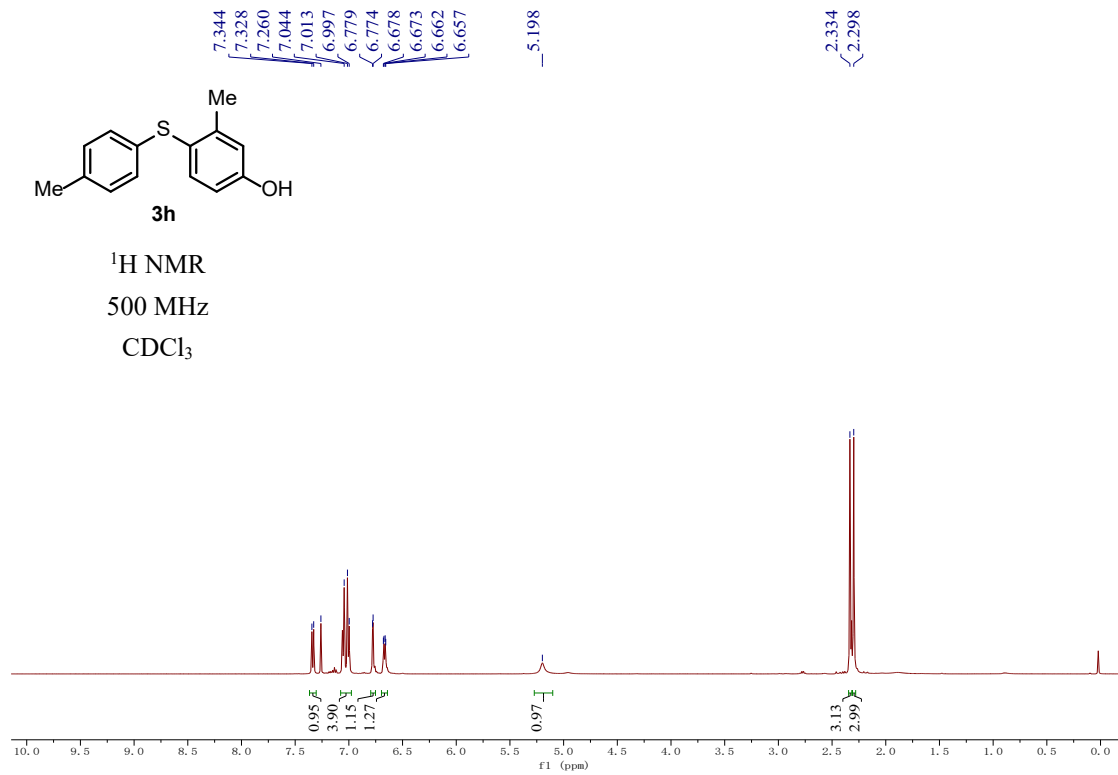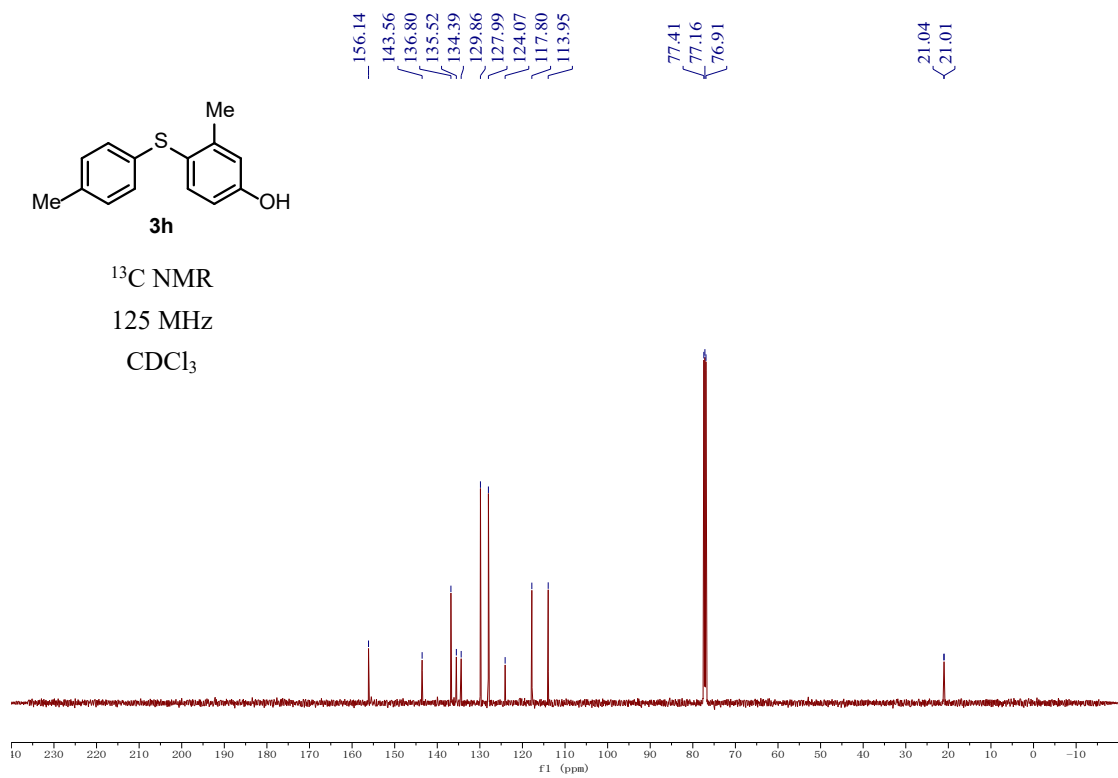

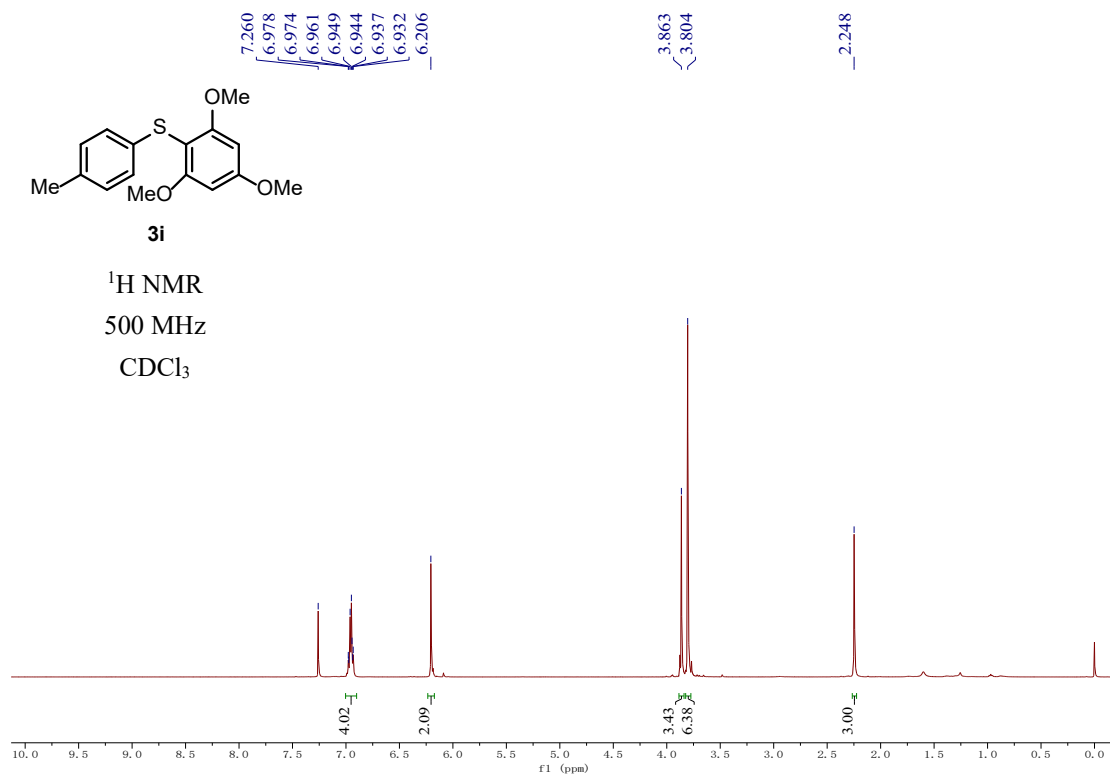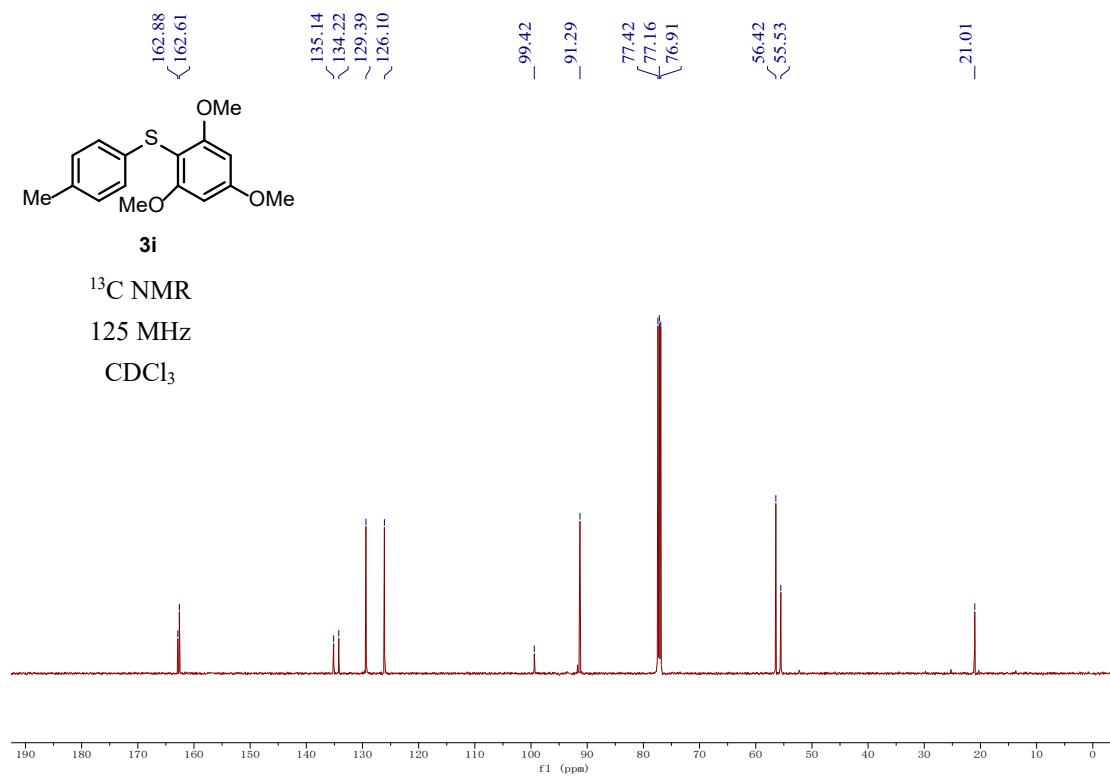

7.802  
7.828  
7.816  
7.809  
7.791  
7.774  
7.759  
7.753  
7.741  
7.507  
7.497  
7.493  
7.486  
7.478  
7.475  
7.465  
7.441  
7.437  
7.424  
7.420  
7.413  
7.409  
7.398  
7.395  
7.393  
7.344  
7.330  
7.326  
7.314  
7.288  
7.273  
7.260

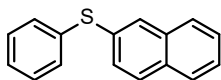

**3j**

<sup>1</sup>H NMR

500 MHz

CDCl<sub>3</sub>

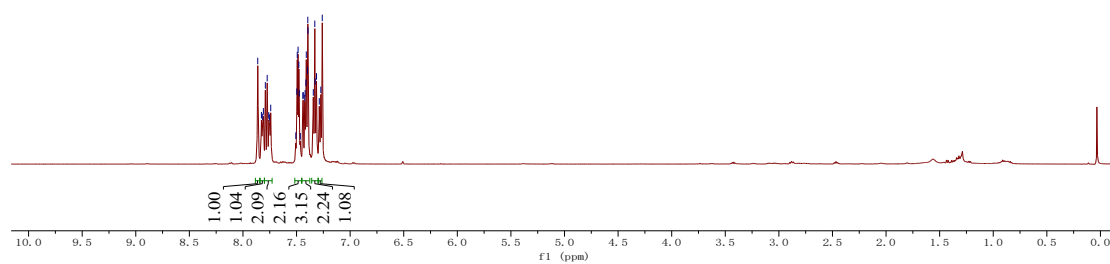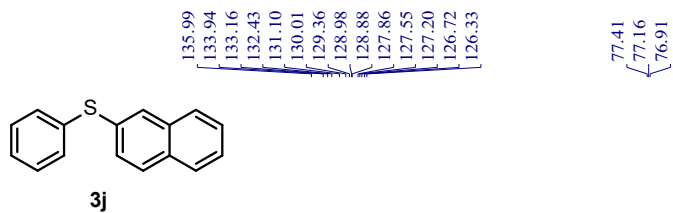

**3j**

<sup>13</sup>C NMR

125 MHz

CDCl<sub>3</sub>

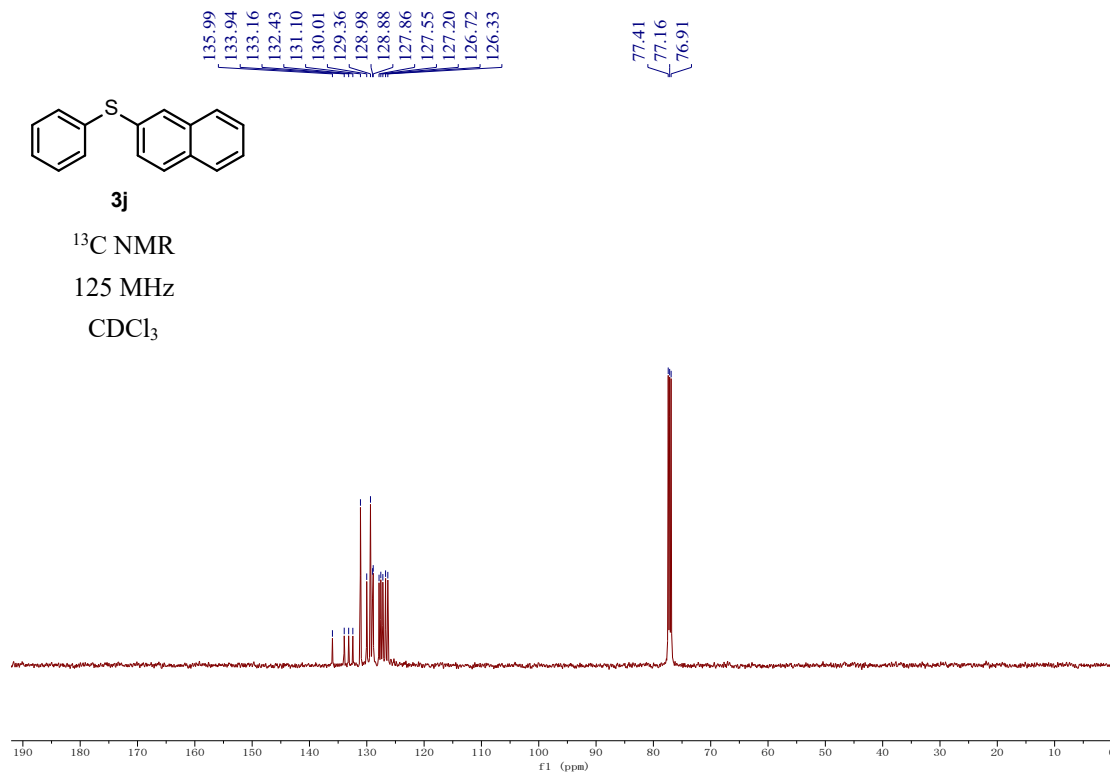

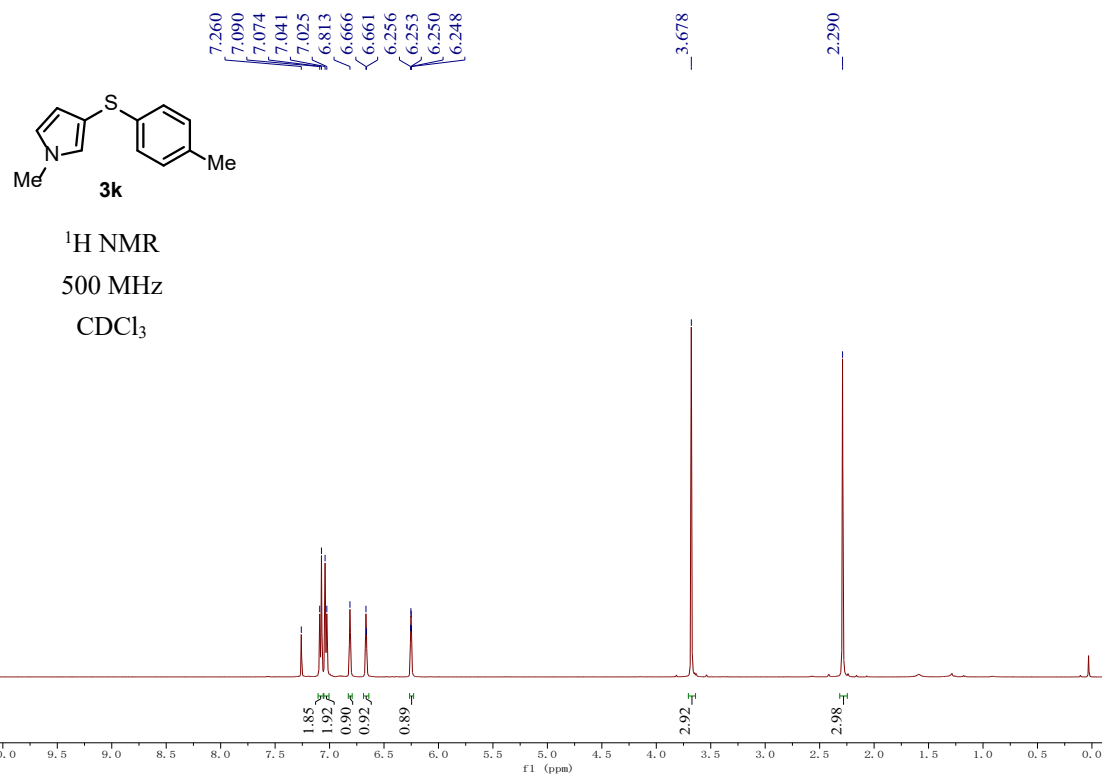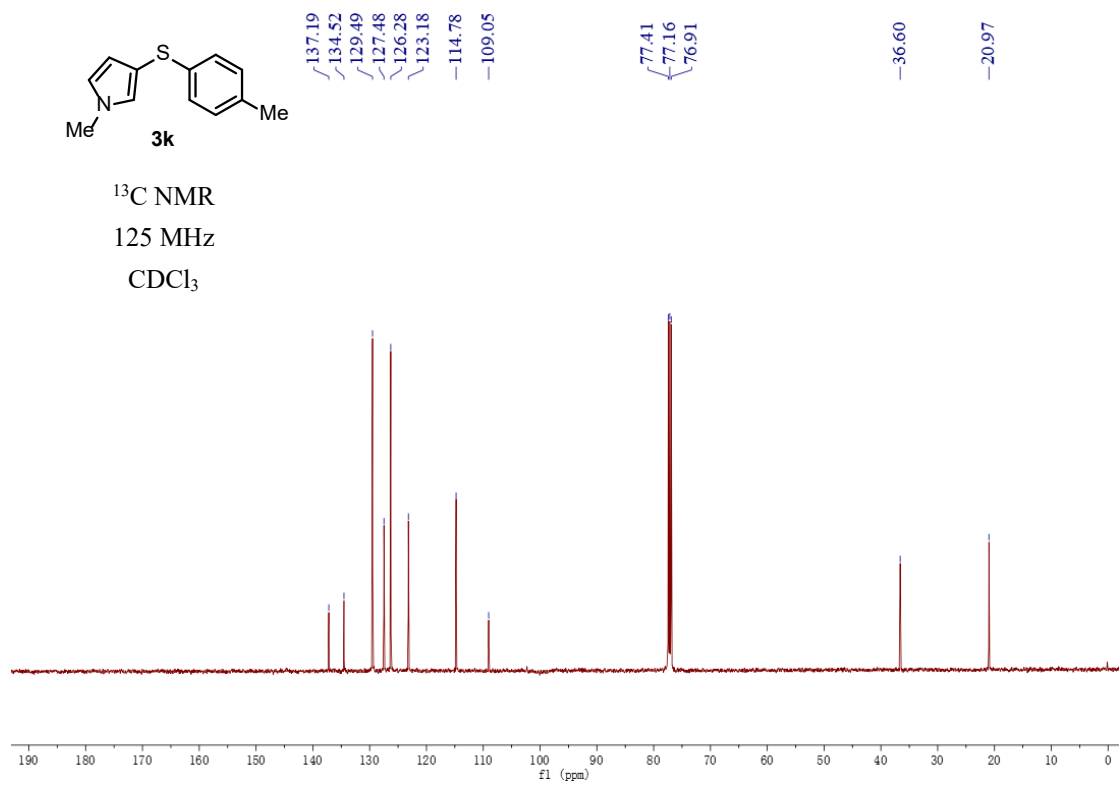

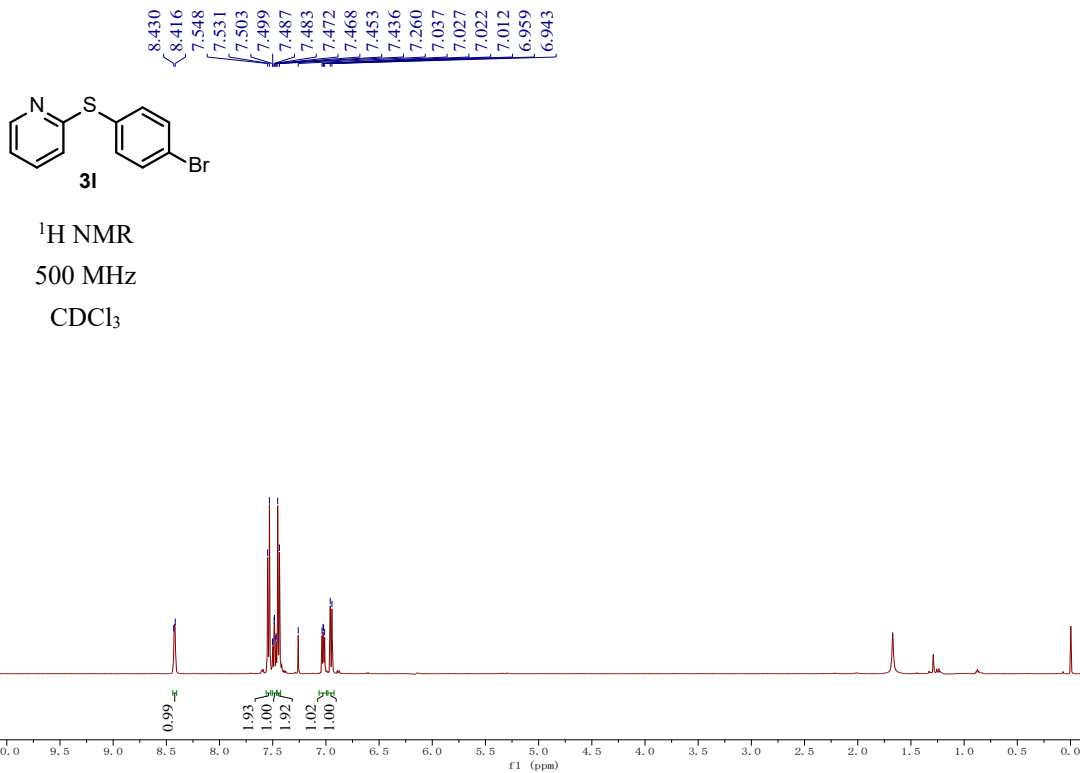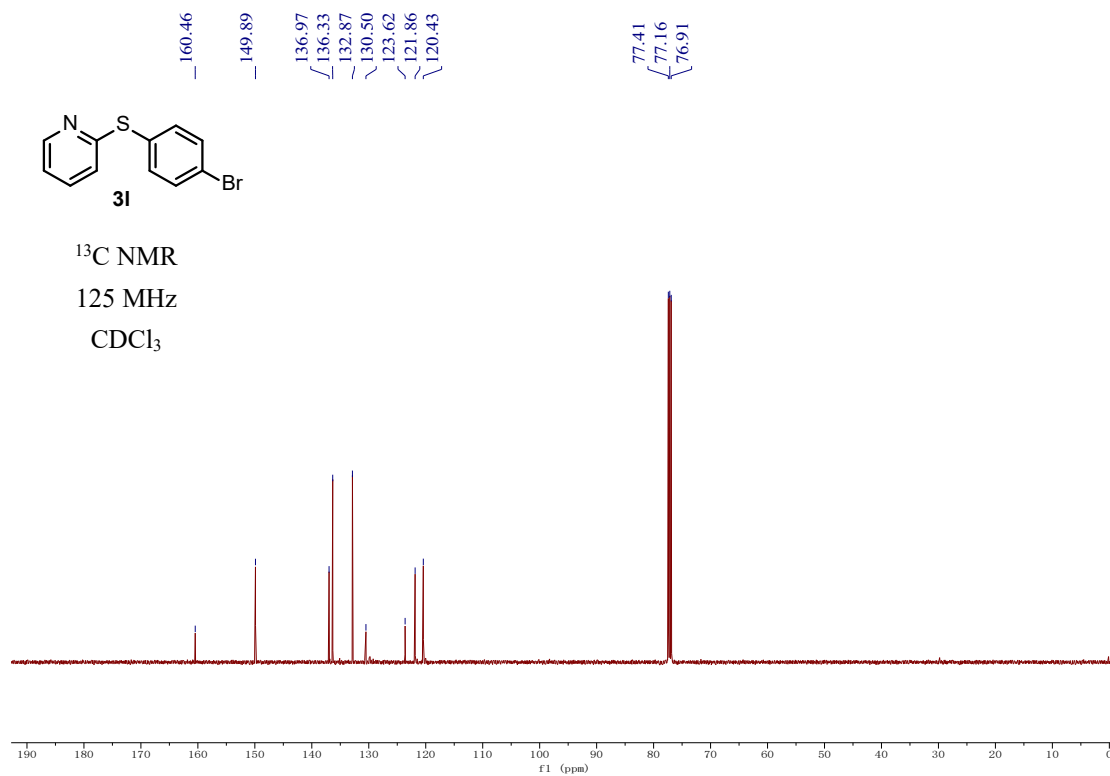



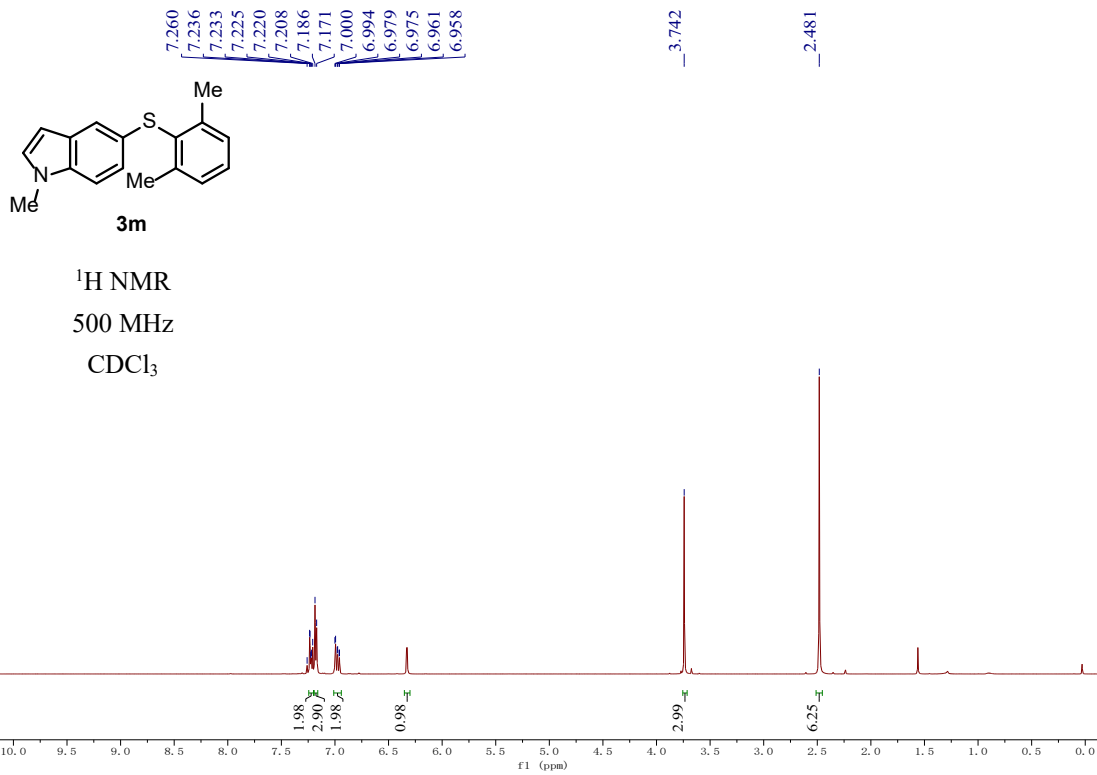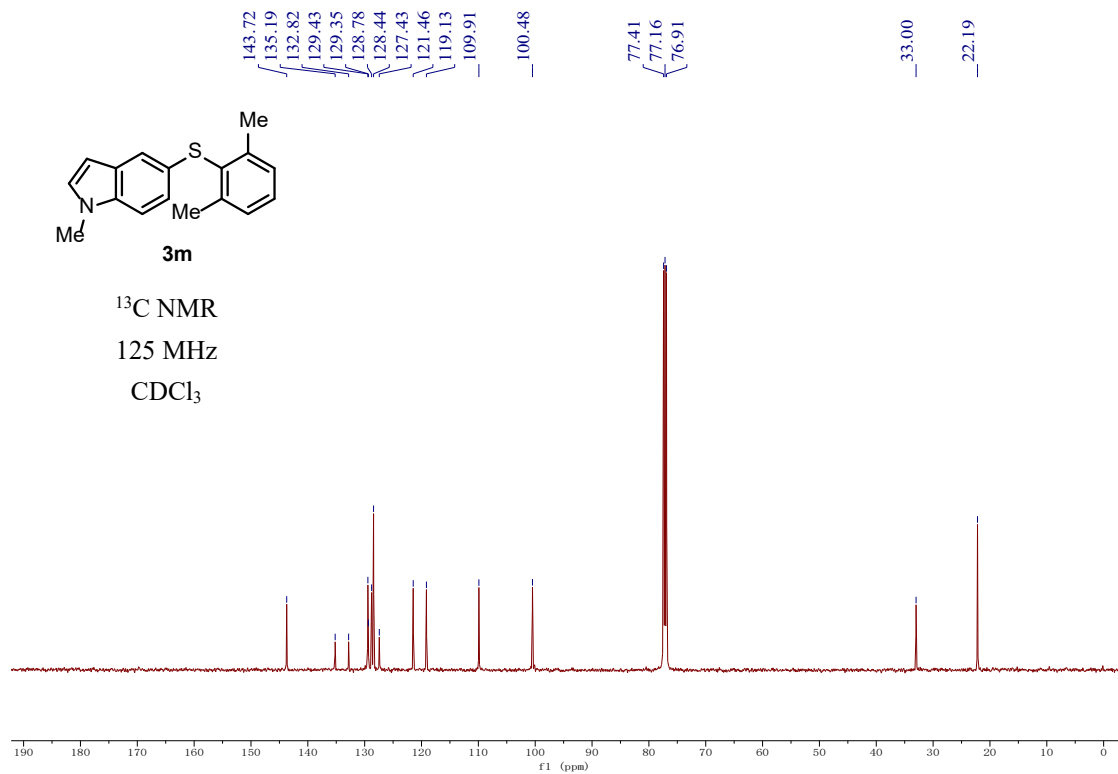

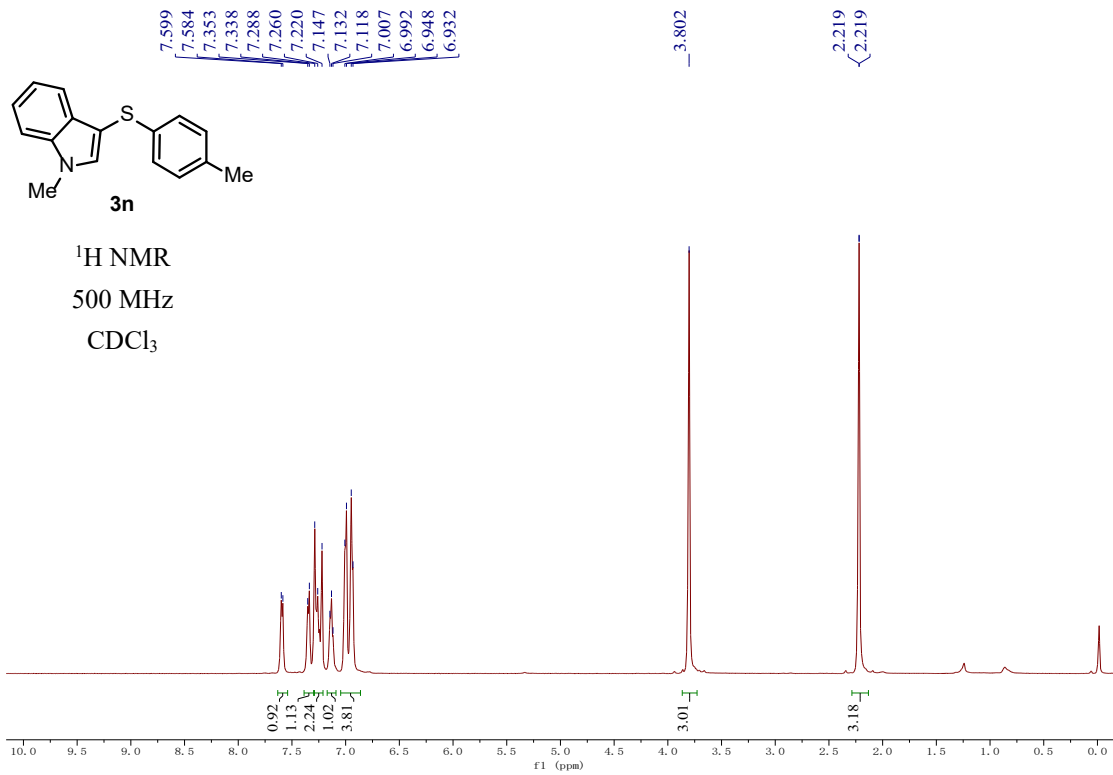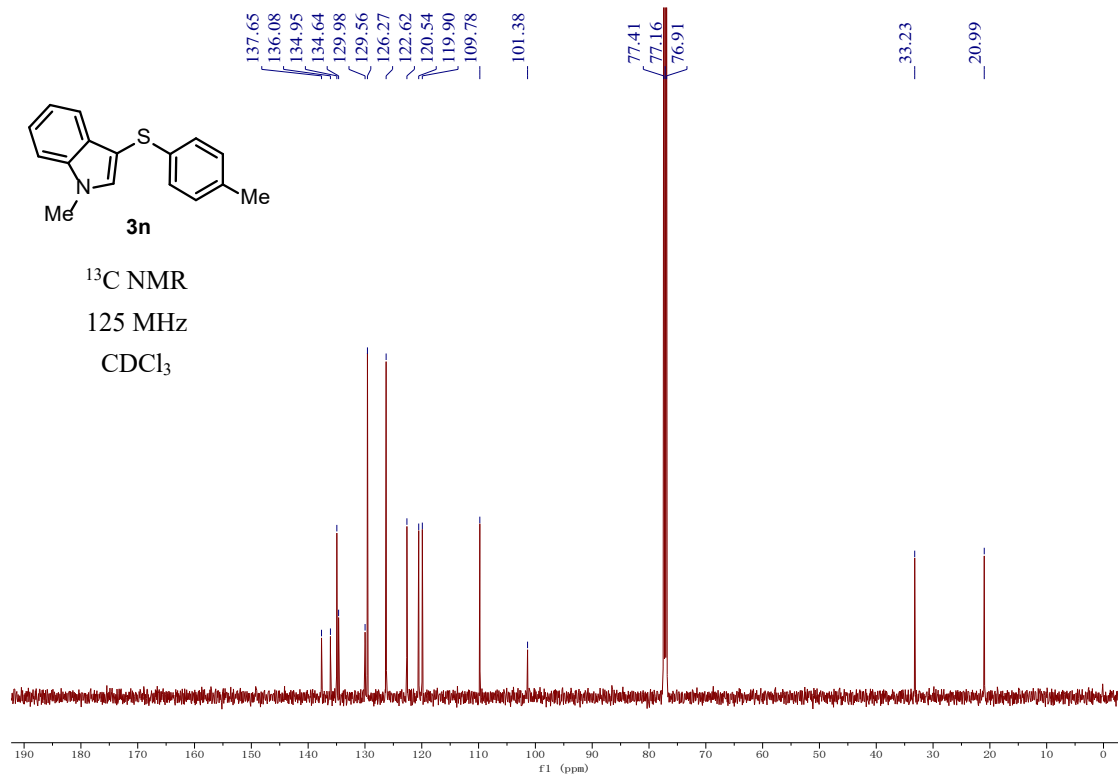

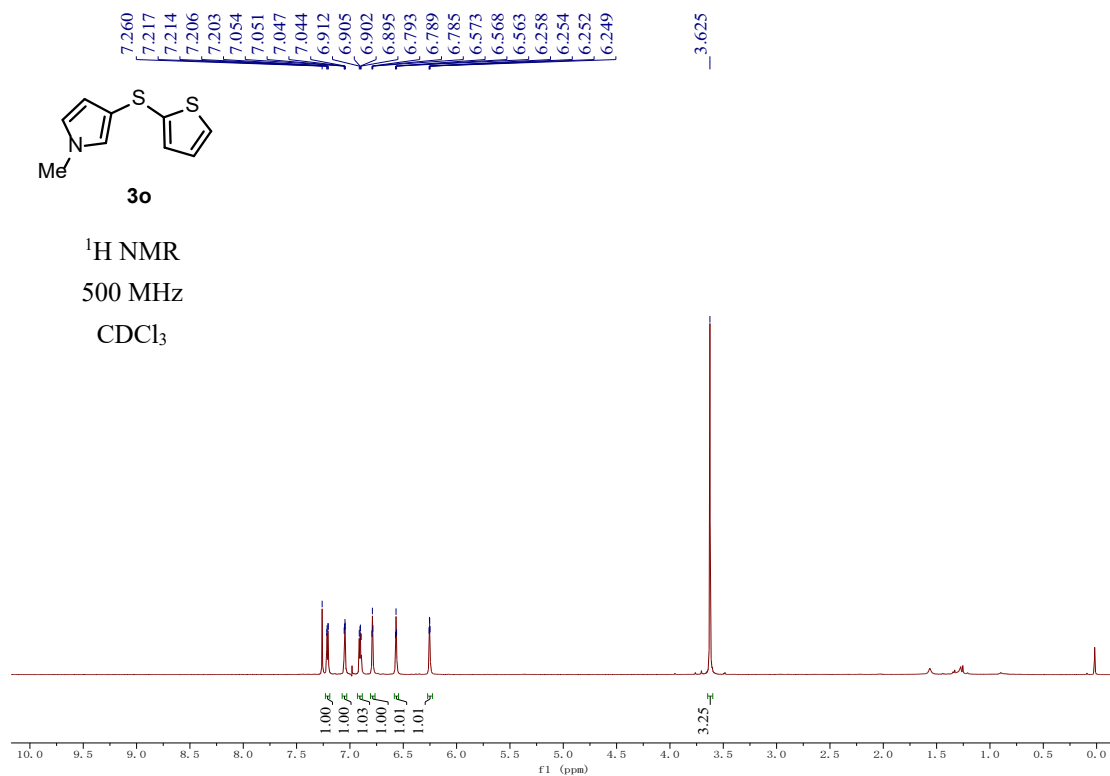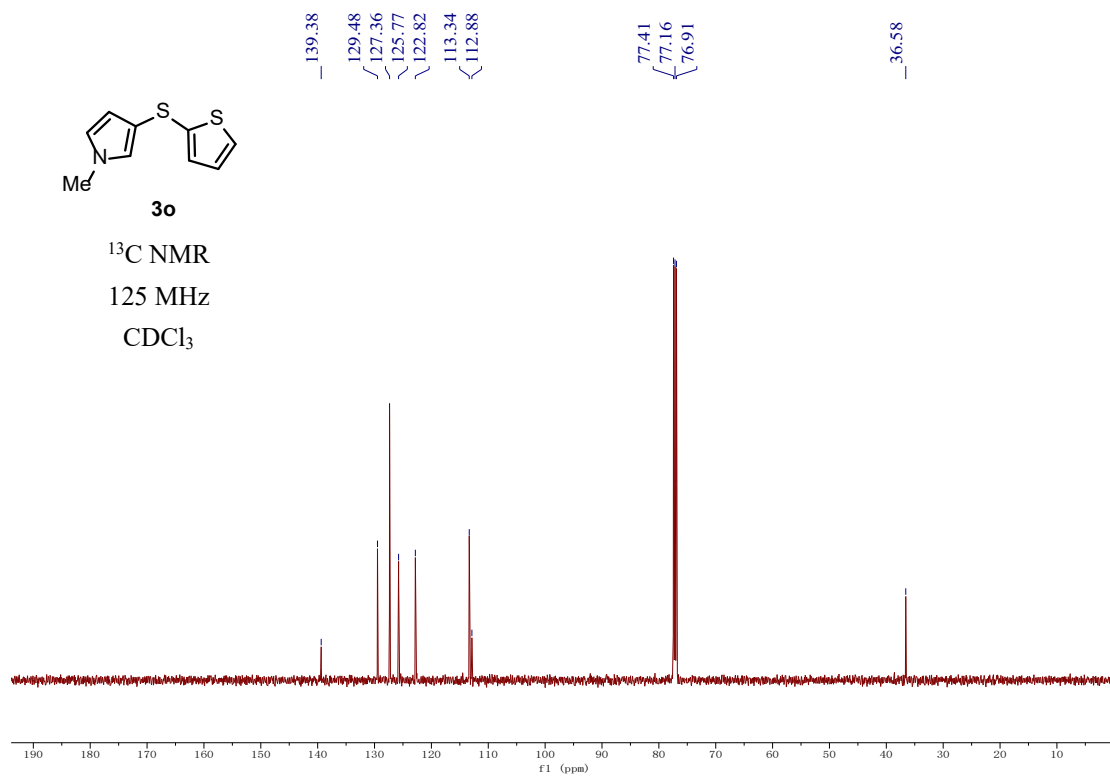

8.193  
8.186  
8.179  
8.174  
8.167  
8.159  
8.157  
7.897  
7.889  
7.883  
7.879  
7.877  
7.871  
7.863  
7.496  
7.488  
7.485  
7.482  
7.476  
7.473  
7.470  
7.467  
7.462  
7.459  
7.260

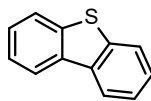

**3p**

<sup>1</sup>H NMR

500 MHz

CDCl<sub>3</sub>

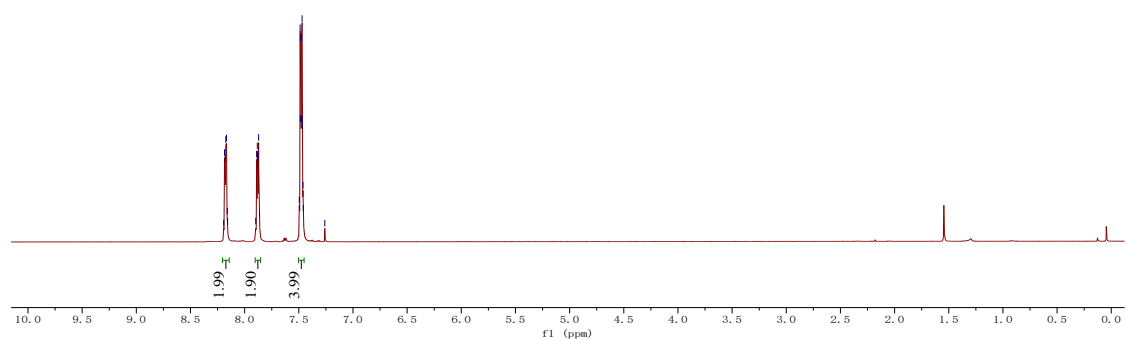

139.44  
135.55  
126.70  
124.35  
122.81  
121.58

77.30  
77.05  
76.80

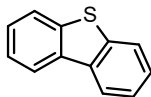

**3p**

<sup>13</sup>C NMR

125 MHz

CDCl<sub>3</sub>

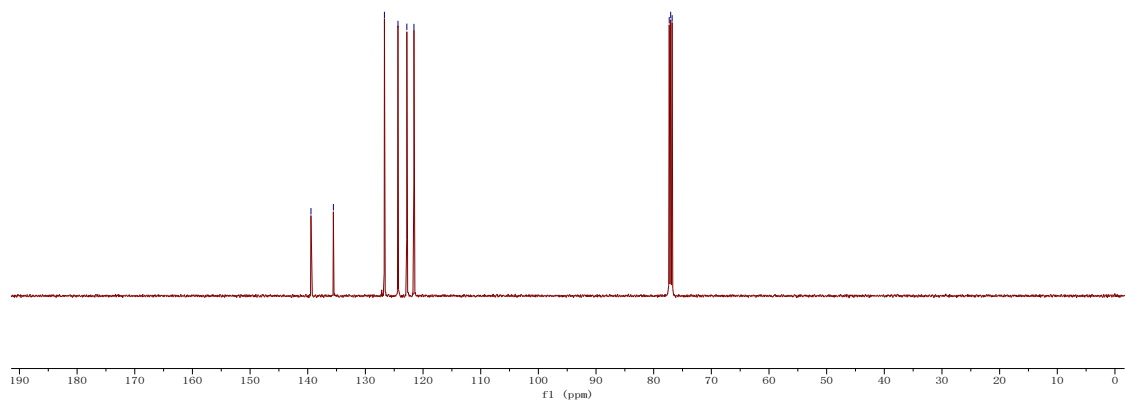

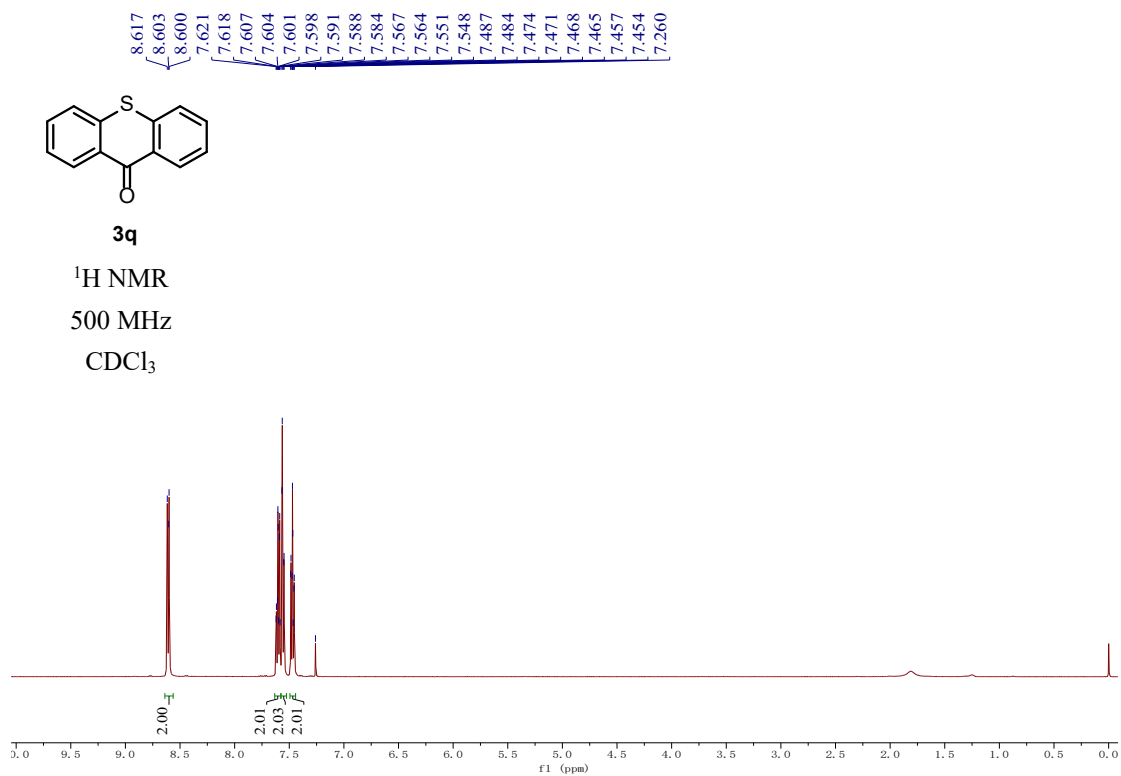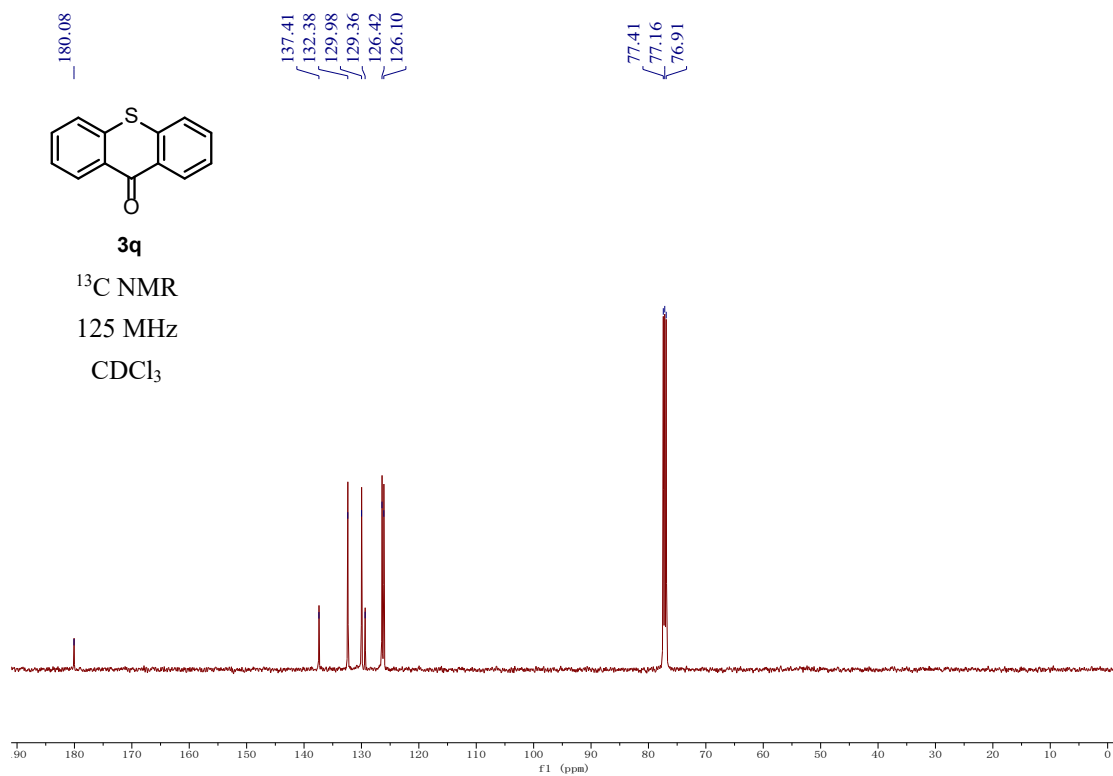

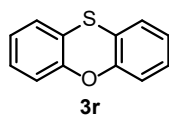

7.260  
7.152  
7.149  
7.136  
7.121  
7.118  
7.114  
7.111  
7.098  
7.095  
7.025  
7.012  
7.009  
6.999

<sup>1</sup>H NMR  
500 MHz  
CDCl<sub>3</sub>

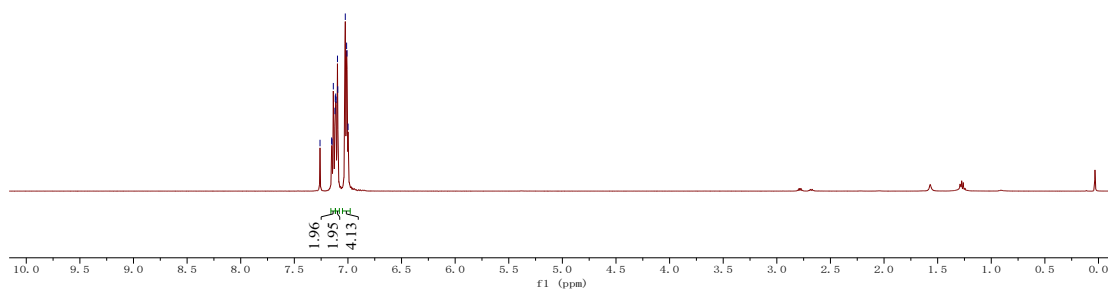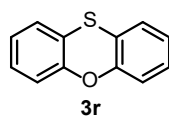

152.28

127.81  
126.89  
124.62  
120.25  
117.91

77.41  
77.16  
76.91

<sup>13</sup>C NMR  
125 MHz  
CDCl<sub>3</sub>

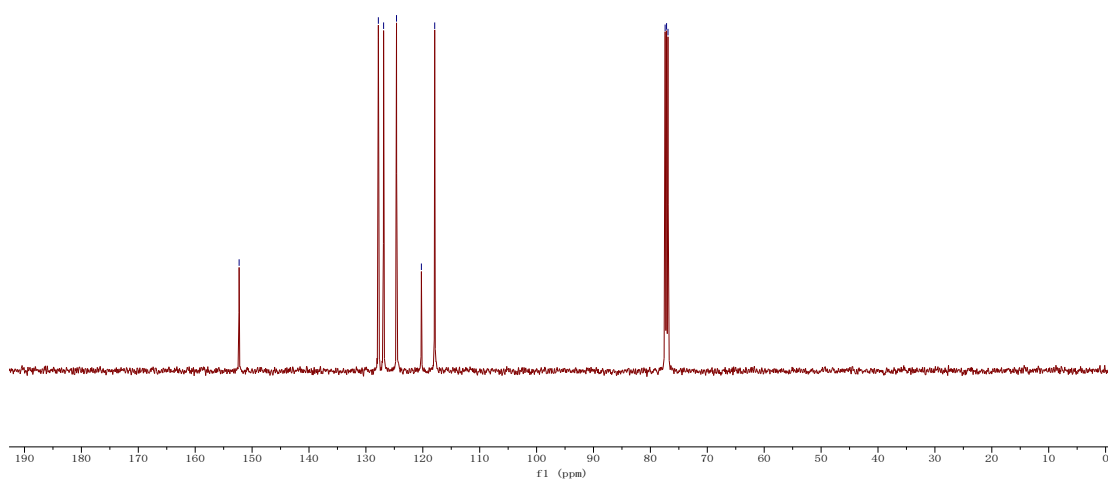

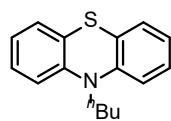

**3s**

$^1\text{H}$  NMR  
500 MHz  
 $\text{CDCl}_3$

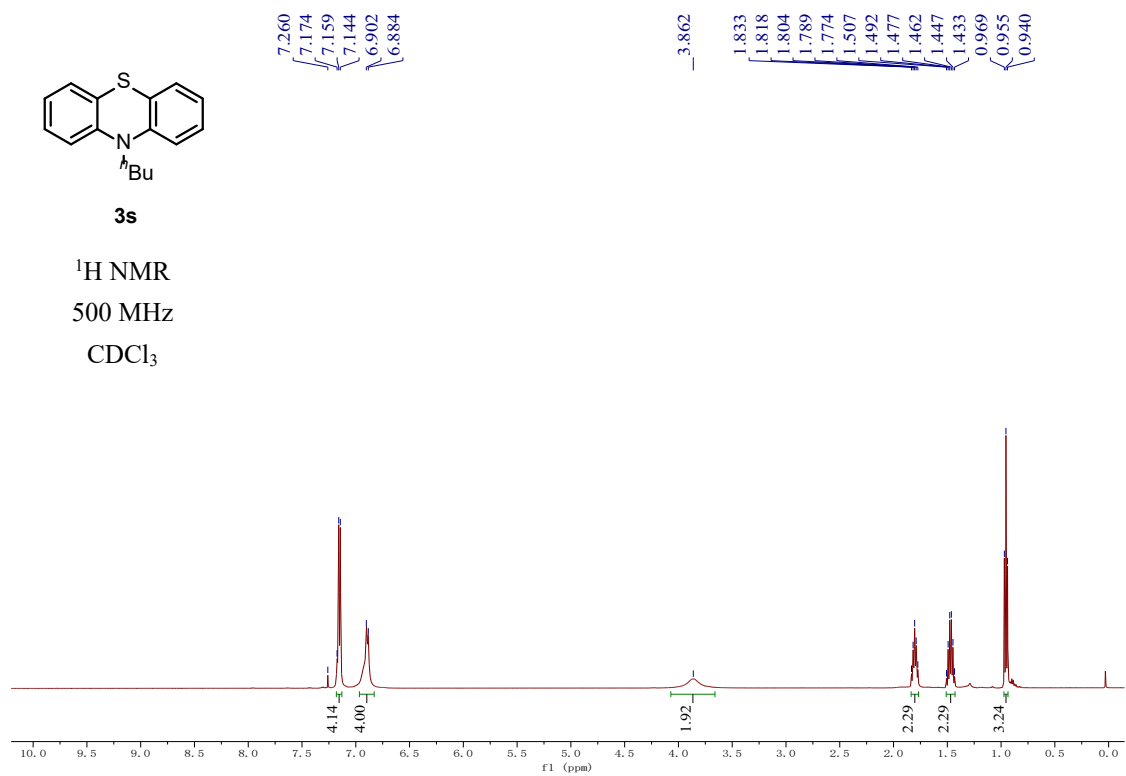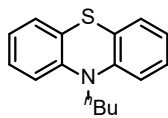

**3s**

$^{13}\text{C}$  NMR  
125 MHz  
 $\text{CDCl}_3$

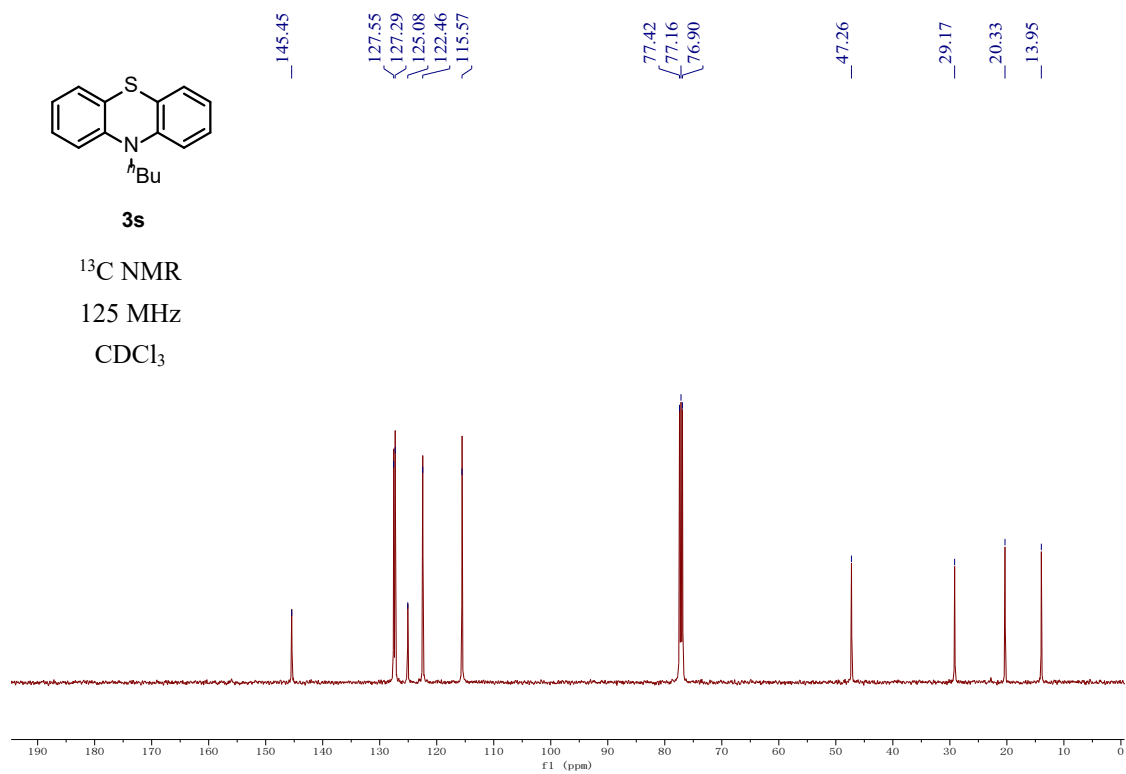

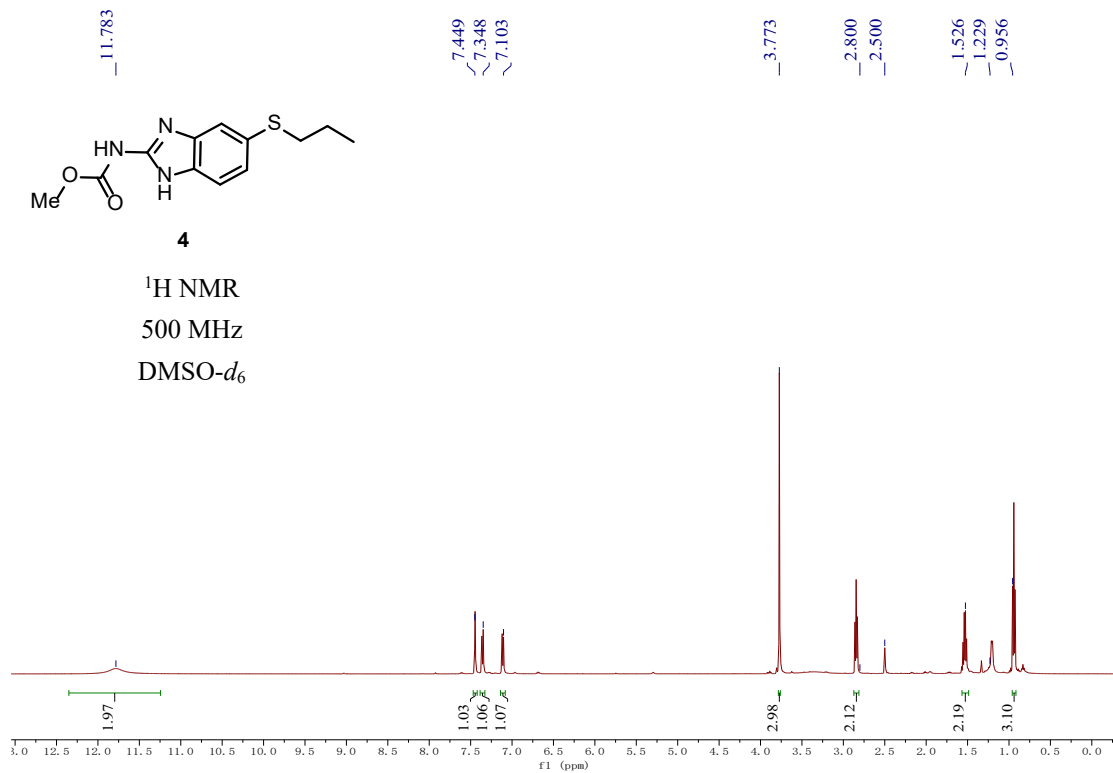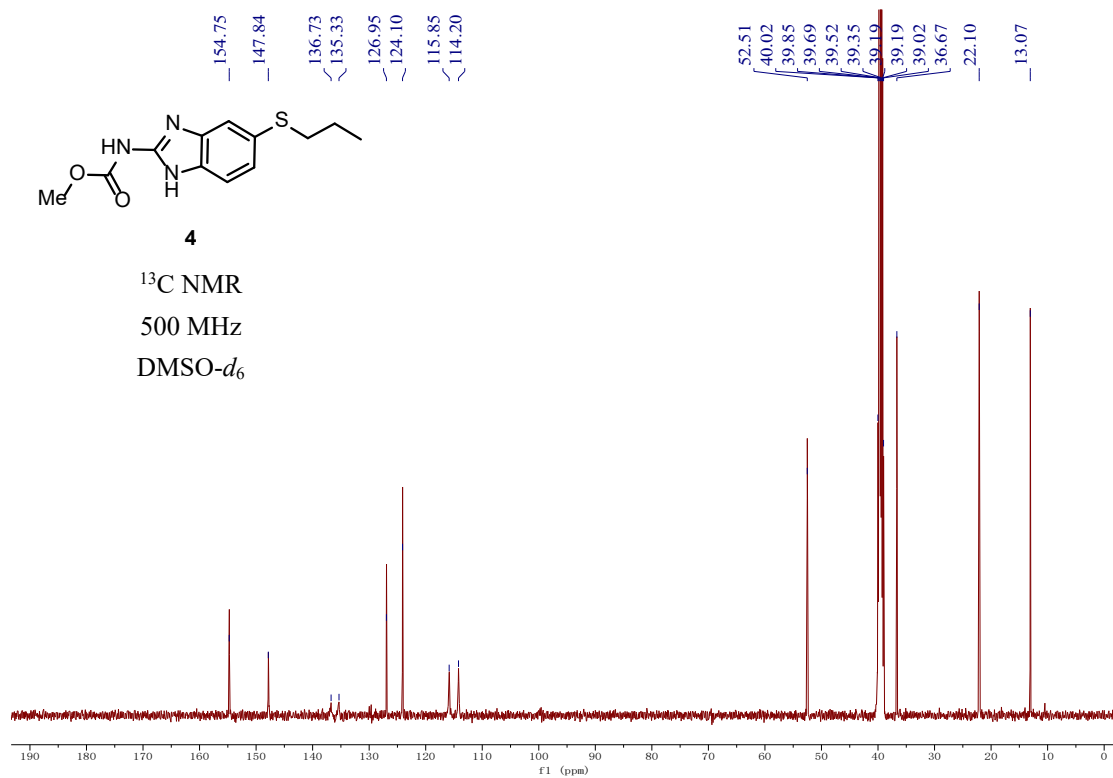

Supplement: d1gc00591j1.pdf [file d1gc00591j1.pdf]
